# Supplementary material
Source: PubMed Central journal article supplement (PMC2747740)

# The Selective Monoarylation of Acetate Esters and Aryl Methyl Ketones Using Aryl Chlorides

*Mark R. Biscoe and Stephen L. Buchwald\**

Department of Chemistry, Massachusetts Institute of Technology, 77 Massachusetts Avenue, Cambridge Massachusetts 02139

## Supporting Information

**General: Reagent Information.** THF, Et<sub>2</sub>O, CH<sub>2</sub>Cl<sub>2</sub> and toluene were purchased from J.T. Baker in CYCLE-TAINER<sup>®</sup> solvent-delivery kegs and vigorously purged with argon for 2 h. The solvents were further purified by passing them under argon pressure through two packed columns of neutral alumina (for THF and Et<sub>2</sub>O) or through neutral alumina and copper (II) oxide (for toluene and CH<sub>2</sub>Cl<sub>2</sub>). All reagents and solvents were used as received unless otherwise noted. Precatalyst **3** was prepared as described in ref. 1. *t*-Butyl acetate (Aldrich) was distilled from CaH<sub>2</sub>. 1M solutions of LHMDS in toluene were purchased from Aldrich. XPhos was received as a gift from Shasun. *t*-BuXPhos was purchased from Strem. KO*t*-Bu (Acros) was stored in a glovebox under an atmosphere of N<sub>2</sub>; scintillation vials of KO*t*-Bu were removed from the glovebox and stored in a benchtop desiccator for use (ca. 2 months). Flash chromatography was performed using Silicycle silica gel (ultra pure grade).

**General Analytical Information.** All compounds were characterized by <sup>1</sup>H NMR, <sup>13</sup>C NMR, and <sup>31</sup>P NMR (where applicable) spectroscopy. Copies of the <sup>1</sup>H, <sup>13</sup>C, and <sup>31</sup>P NMR spectra can be found at the end of the Supporting Information. Nuclear Magnetic Resonance spectra were recorded on a Bruker 400 MHz instrument. All <sup>1</sup>H NMR experiments are reported in δ units, parts per million (ppm), and were measured relative to the signals for residual chloroform (7.26 ppm) in the deuterated solvent, unless otherwise stated. All <sup>13</sup>C NMR spectra are reported in ppm relative to deuteriochloroform (77.23 ppm), unless otherwise stated, and all were obtained with <sup>1</sup>H decoupling. All <sup>31</sup>P NMR spectra are reported in ppm relative to H<sub>3</sub>PO<sub>4</sub> (0 ppm – external standard). All GC analyses were performed on a Hewlett-Packard 6890 gas chromatograph with an FID detector using a 25 m x 0.20 mm capillary column with cross-linked methyl siloxane as the stationary phase.

### General Procedural Information.

#### Representative procedure for the monoarylation of *t*-butyl acetate:

*t*-BuXPhos precatalyst **3** (4 mg, 0.005 mmol) was added to a test tube equipped with a stirbar. The test tube was sealed with a teflon septum-lined screw cap and evacuated/backfilled with argon. 4-Chlorotoluene (59 μL, 0.5 mmol), *t*-butyl acetate

(101  $\mu\text{L}$ , 0.75 mmol) and 1M LHMDS/toluene solution (1.5 mL, 1.5 mmol) were added in succession via syringe. The reaction mixture was allowed to stir for 30 min at room temperature. At this point, saturated aqueous  $\text{NH}_4\text{Cl}$  (ca. 1 mL) was added to the reaction solution, and the resulting mixture was vigorously shaken. This mixture was then poured into a separatory funnel and extracted three times with EtOAc. The combined organic washes were dried over  $\text{Na}_2\text{SO}_4$ . After column chromatography (2:98 to 4:96 gradient of EtOAc:Hexanes), the desired product was obtained as a colorless liquid (102 mg, 98 %).

### Representative procedures for the monoarylation of aryl acetyls:

#### *Procedure A: (generally with non-heteroaryl chlorides):*

XPhos precatalyst **4** (4 mg, 0.005 mmol) and  $\text{KO}t\text{-Bu}$  (112 mg, 1 mmol) were added to a test tube equipped with a stirbar. The test tube was sealed with a teflon septum-lined screw cap and evacuated/backfilled with argon. 4-Butyl chlorobenzene (0.089 g, 0.525 mmol), 2-acetylthiophene (54  $\mu\text{L}$ , 0.5 mmol) and toluene (2.0 mL) were added to the reaction vessel in succession via syringe. The reaction mixture was heated to 60  $^\circ\text{C}$  for 4 h. After cooling to room temperature, saturated aqueous  $\text{NH}_4\text{Cl}$  (ca. 1 mL) was added to the reaction solution, and the resulting mixture was vigorously shaken. This mixture was then poured into a separatory funnel and extracted three times with EtOAc. The combined organic washes were dried over  $\text{Na}_2\text{SO}_4$ . After column chromatography (90:10 Hex:EtOAc), the desired product was obtained as a colorless liquid (114 mg, 88 %).

#### *Procedure B (generally with heteroaryl chlorides):*

XPhos precatalyst **4** (4 mg, 0.005 mmol) and  $\text{KO}t\text{-Bu}$  (132 mg, 1.2 mmol) were added to a test tube equipped with a stirbar. The test tube was sealed with a teflon septum-lined screw cap and evacuated/backfilled with argon. 3-Chloropyridine (48  $\mu\text{L}$ , 0.5 mmol), 3-acetylpyridine (66  $\mu\text{L}$ , 0.6 mmol) and toluene (2.0 mL) were added to the reaction vessel in succession via syringe. The reaction mixture was heated to 60  $^\circ\text{C}$  for 4 h. After cooling to room temperature, saturated aqueous  $\text{NH}_4\text{Cl}$  (ca. 1 mL) was added to the reaction solution, and the resulting mixture was vigorously shaken. This mixture was then poured into a separatory funnel and extracted three times with EtOAc. The combined organic washes were dried over  $\text{Na}_2\text{SO}_4$ . After column chromatography (94:6  $\text{CH}_2\text{Cl}_2$ :MeOH), the desired product was obtained as a pale yellow solid (84 mg, 85 %).

### Preparation of *t*-BuXPhos precatalyst:

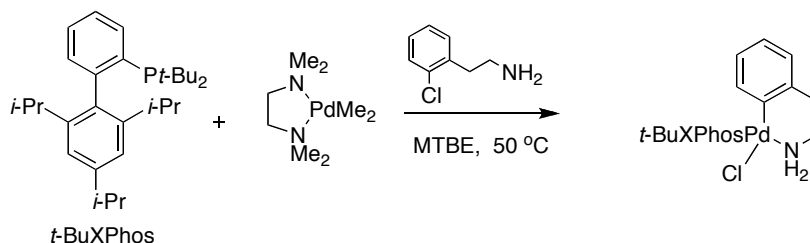

To a Schlenk tube equipped with a stirbar and a teflon screw valve,  $\text{Me}_2\text{Pd}(\text{II})(\text{tmeda})$  (0.48 g, 1.9 mmol) was added. The Schlenk tube was evacuated and back-filled with argon; this sequence was repeated a total of 3 times. Under a positive pressure of argon, the teflon screw valve was replaced with a rubber septum, through which MTBE (4 mL) and 2-chloro phenethylamine (0.3 g, 1.9 mmol) (Aldrich) were added via syringe. Still under a positive pressure of argon, the rubber septum was removed and *t*-BuXPhos (0.8 g, 1.9 mmol) was added. The reaction mixture was then resealed with the Teflon screw valve. The mixture was heated to 50 °C for 2 h. As the reaction progressed, it became milky-white in appearance. After cooling to room temperature, the reaction mixture was transferred to an Erlenmeyer flask using hexanes and then placed in a -20 °C freezer for 1 h. Using suction filtration, **6** was isolated as a white powder (0.98 g, 76 %).  $^1\text{H}$  NMR (400 MHz,  $\text{CDCl}_3$ ) is very complex (see below).  $^{31}\text{P}$  NMR (162 MHz,  $\text{CDCl}_3$ ):  $\delta$  57.5.

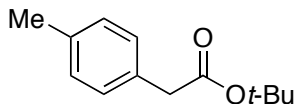

**tert-Butyl 2-*p*-tolylacetate** (Table 1, Entry 1). The general procedure was employed as described. A colorless oil (102 mg, 98 %) was isolated by column chromatography (gradient from 98:2 to 96:4 Hex:EtOAc).  $^1\text{H}$  NMR (400 MHz,  $\text{CDCl}_3$ )  $\delta$ : 7.16 (m, 4 H), 3.49 (s, 2 H), 2.34 (s, 3 H), 1.45 (s, 9 H).  $^{13}\text{C}$  NMR (100 MHz,  $\text{CDCl}_3$ ):  $\delta$  171.4, 136.5, 131.8, 129.3, 129.2, 80.9, 42.4, 28.2, 21.3. IR (neat,  $\text{cm}^{-1}$ ): 3051, 3006, 2979, 2927, 2871, 1734, 1516, 1368, 1258, 1142. Anal. Calcd. for  $\text{C}_{13}\text{H}_{18}\text{O}_2$ : C, 75.69; H, 8.80. Found: C, 75.97; H, 9.03.

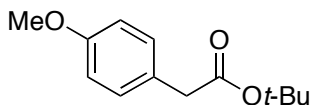

**tert-Butyl 2-(4-methoxyphenyl)acetate** (Table 1, Entry 2). The general procedure was employed as described. A colorless oil (100 mg, 90 %) was isolated by column chromatography (85:15 Hex:EtOAc).  $^1\text{H}$  NMR (400 MHz,  $\text{CDCl}_3$ )  $\delta$ : 7.18 (d,  $J$  = 8.7 Hz, 2 H), 6.85 (d,  $J$  = 8.7 Hz, 2 H), 3.79 (s, 3 H), 3.46 (s, 2 H), 1.44 (s, 9 H).  $^{13}\text{C}$  NMR (100 MHz,  $\text{CDCl}_3$ ):  $\delta$  171.5, 158.7, 130.4, 127.0, 114.1, 80.9, 55.4, 41.9, 28.2. IR (neat,  $\text{cm}^{-1}$ ): 3036, 3003, 2978, 2935, 2837, 1733, 1614, 1514, 1368, 1036. Anal. Calcd. for  $\text{C}_{15}\text{H}_{17}\text{NO}_2$ : C, 70.24; H, 8.16. Found: C, 70.21; H, 8.35.

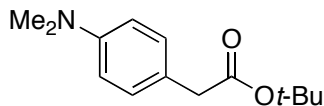

**tert-Butyl 2-(4-(dimethylamino)phenyl)acetate** (Table 1, Entry 3). The general procedure was employed as described. A colorless liquid (106 mg, 90 %) was isolated by column chromatography (gradient from 90:10 to 85:15 Hex:EtOAc).  $^1\text{H}$  NMR (400 MHz,  $\text{CDCl}_3$ )  $\delta$ : 7.13 (d,  $J$  = 8.6 Hz, 2 H), 6.70 (d,  $J$  = 8.6 Hz, 2 H), 3.42 (s, 2 H), 2.93 (s,

6 H), 1.43 (s, 9 H).  $^{13}\text{C}$  NMR (100 MHz,  $\text{CDCl}_3$ ):  $\delta$  171.9, 149.8, 130.0, 122.9, 113.0, 80.6, 41.8, 41.0, 28.3. IR (neat,  $\text{cm}^{-1}$ ): 3074, 2978, 2931, 2802, 1733, 1617, 1524, 1367, 1141, 948. Anal. Calcd. for  $\text{C}_{14}\text{H}_{21}\text{NO}_2$ : C, 71.46; H, 8.99. Found: C, 71.49; H, 8.94.

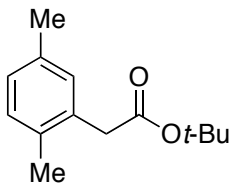

**tert-Butyl 2-(2,5-dimethylphenyl)acetate** (Table 1, Entry 4). The general procedure was employed as described. A colorless oil (104 mg, 95 %) was isolated by column chromatography (97:3 Hex:EtOAc).  $^1\text{H}$  NMR (400 MHz,  $\text{CDCl}_3$ )  $\delta$ : 7.06 (d,  $J$  = 7.6 Hz, 1 H), 6.97-7.01 (m, 2 H), 3.51 (s, 2 H), 2.30 (s, 3 H), 2.26 (s, 3 H), 1.45 (s, 9 H).  $^{13}\text{C}$  NMR (100 MHz,  $\text{CDCl}_3$ ):  $\delta$  171.3, 135.6, 133.7, 133.4, 131.1, 130.3, 128.0, 80.9, 40.7, 28.5, 21.1, 19.3. IR (neat,  $\text{cm}^{-1}$ ): 3004, 2978, 2927, 2870, 1734, 1506, 1457, 1368, 1145. Anal. Calcd. for  $\text{C}_{14}\text{H}_{20}\text{O}_2$ : C, 76.33; H, 9.15. Found: C, 76.10; H, 9.28.

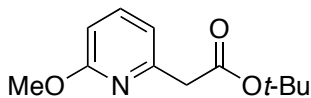

**tert-Butyl 2-(6-methoxypyridin-2-yl)acetate** (Table 1, Entry 5). The general procedure was employed as described, but using an ice bath instead of at rt. A colorless liquid (103 mg, 92 %) was isolated by column chromatography (90:10 Hex:EtOAc).  $^1\text{H}$  NMR (400 MHz,  $\text{CDCl}_3$ )  $\delta$ : 7.50 (dd,  $J$  = 8.2, 7.3 Hz, 1 H), 6.80 (d,  $J$  = 7.2 Hz, 1 H), 6.59 (d,  $J$  = 8.3 Hz, 1 H), 3.90 (s, 3 H), 3.63 (s, 2 H), 1.45 (s, 9 H).  $^{13}\text{C}$  NMR (100 MHz,  $\text{CDCl}_3$ ):  $\delta$  170.3, 163.8, 152.9, 139.0, 116.3, 108.8, 81.1, 53.5, 45.1, 28.2. IR (neat,  $\text{cm}^{-1}$ ): 3069, 3005, 2979, 2952, 2872, 1734, 1602, 1580, 1469, 1036.

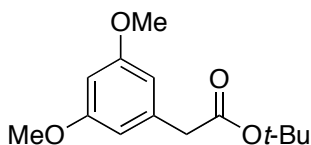

**tert-Butyl 2-(3,5-dimethoxyphenyl)acetate** (Table 1, Entry 6). The general procedure was employed as described. A colorless oil (112 mg, 89 %) was isolated by column chromatography (85:15 Hex:EtOAc).  $^1\text{H}$  NMR (400 MHz,  $\text{CDCl}_3$ )  $\delta$ : 6.43 (d,  $J$  = 2.2 Hz, 2 H), 6.36 (t,  $J$  = 2.2 Hz, 1 H), 3.78 (s, 6 H), 3.46 (s, 2 H), 1.4 (s, 9 H).  $^{13}\text{C}$  NMR (100 MHz,  $\text{CDCl}_3$ ):  $\delta$  170.9, 160.9, 137.0, 107.4, 99.2, 81.1, 55.5, 43.1, 28.2. IR (neat,  $\text{cm}^{-1}$ ): 3002, 2977, 2937, 2839, 1734, 1598, 1458, 1207, 1068, 686. Anal. Calcd. for  $\text{C}_{14}\text{H}_{20}\text{O}_4$ : C, 66.65; H, 7.99. Found: C, 66.89; H, 8.12.



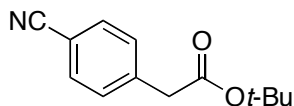

**tert-Butyl 2-(4-cyanophenyl)acetate** (Table 1, Entry 7).<sup>2</sup> The general procedure was employed as described, but using an ice bath instead of at rt. A white powder (94 mg, 87 %) containing < 5 % diarylated product was isolated by column chromatography (80:20 Hex:EtOAc). <sup>1</sup>H NMR (400 MHz, CDCl<sub>3</sub>) δ: 7.60 (d, *J* = 8.4 Hz, 2 H), 7.37 (d, *J* = 8.4 Hz, 2 H), 3.58 (s, 2 H), 1.42 (s, 9 H). <sup>13</sup>C NMR (100 MHz, CDCl<sub>3</sub>): δ 169.7, 140.2, 132.4, 130.3, 119.0, 111.0, 81.8, 42.7, 28.1. IR (neat, cm<sup>-1</sup>): 3067, 3052, 3008, 2981, 2227, 1734, 1609, 1510, 1339, 1150.

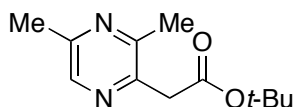

**tert-Butyl 2-(3,5-dimethylpyrazin-2-yl)acetate** (Table 1, Entry 8). The general procedure was employed as described. A yellow liquid (93 mg, 84 %) was isolated by column chromatography (50:50 Hex:EtOAc). <sup>1</sup>H NMR (400 MHz, CDCl<sub>3</sub>) δ: 8.21 (s, 1 H), 3.76 (s, 2 H), 2.48 (s, 6 H), 1.42 (s, 9 H). <sup>13</sup>C NMR (100 MHz, CDCl<sub>3</sub>): δ 169.3, 150.4, 149.8, 148.3, 142.2, 81.8, 43.0, 28.2, 21.3, 21.1. IR (neat, cm<sup>-1</sup>): 3046, 2979, 2929, 1733, 1457, 1369, 1280, 1153. Anal. Calcd. for C<sub>12</sub>H<sub>18</sub>N<sub>2</sub>O<sub>2</sub>: C, 64.84; H, 8.16. Found: C, 65.04; H, 8.31.

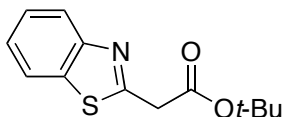

**tert-Butyl 2-(benzo[d]thiazol-2-yl)acetate** (Table 1, Entry 9). The general procedure was employed as described, but with 4 h reaction time. A pale yellow liquid (118 mg, 95 %) was isolated by column chromatography (80:20 Hex:EtOAc). <sup>1</sup>H NMR (400 MHz, CDCl<sub>3</sub>) δ: 8.00 (d, *J* = 8.1 Hz, 1 H), 7.86 (d, *J* = 8.1 Hz, 1 H), 7.46 (td, *J* = 7.1, 1.2 Hz, 1 H), 7.37 (td, *J* = 7.1, 1.2 Hz, 1 H), 4.09 (s, 2 H), 1.49 (s, 9 H). <sup>13</sup>C NMR (100 MHz, CDCl<sub>3</sub>): δ 167.8, 163.5, 152.8, 136.0, 126.2, 125.3, 123.1, 121.7, 82.7, 41.3, 28.2. IR (neat, cm<sup>-1</sup>): 3064, 2979, 2933, 1734, 1507, 1370, 1151, 761. Anal. Calcd. for C<sub>13</sub>H<sub>15</sub>NO<sub>2</sub>S: C, 62.62; H, 6.06. Found: C, 62.06; H, 5.86.

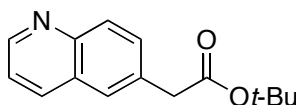

**tert-Butyl 2-(quinolin-6-yl)acetate** (Table 1, Entry 10). The general procedure was employed as described, but with 14 h reaction time. A yellow liquid (103 mg, 85 %) was isolated by column chromatography (95:5 CH<sub>2</sub>Cl<sub>2</sub>:MeOH). <sup>1</sup>H NMR (400 MHz, CDCl<sub>3</sub>) δ: 8.88 (dd, *J* = 4.2, 1.7 Hz, 1 H), 8.11 (d, *J* = 8.3 Hz, 1 H), 8.05 (d, *J* = 8.6 Hz, 1 H), 7.69 (s, 1 H), 7.64 (dd, *J* = 8.6, 2.0 Hz, 1 H), 7.38 (dd, *J* = 8.3, 4.2 Hz, 1 H), 3.71 (s, 2 H), 1.44 (s, 9 H). <sup>13</sup>C NMR (100 MHz, CDCl<sub>3</sub>): δ 170.7, 150.4, 147.6, 136.0, 133.3,

131.3, 129.7, 128.4, 127.9, 121.4, 81.4, 42.8, 28.2. IR (neat,  $\text{cm}^{-1}$ ): 3074, 3003, 2979, 2933, 1729, 1596, 1501, 1368, 1148. Anal. Calcd. for  $\text{C}_{15}\text{H}_{17}\text{NO}_2$ : C, 74.05; H, 7.04. Found: C, 73.89; H, 7.00.

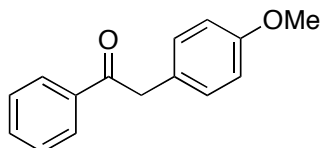

**2-(4-Methoxyphenyl)-1-phenylethanone** (Table 2, Entry 1). General procedure A was employed as described. A white powder (101 mg, 89 %) was isolated by column chromatography (gradient from 95:5 to 90:10 Hex:EtOAc). Mp: 97-98 °C (lit mp:<sup>3</sup> 94-96 °C).  $^1\text{H}$  NMR (400 MHz,  $\text{CDCl}_3$ )  $\delta$ : 8.02 (m, 2 H), 7.56 (tt,  $J = 7.0, 1.3$  Hz, 1H), 7.46 (t,  $J = 7.5$  Hz, 2 H), 7.20 (d,  $J = 8.7$  Hz, 2 H), 6.88 (d,  $J = 8.7$  Hz, 2 H), 4.24 (s, 2 H), 3.78 (s, 3 H).  $^{13}\text{C}$  NMR (100 MHz,  $\text{CDCl}_3$ ):  $\delta$  198.1, 158.6, 136.7, 133.2, 130.6, 128.8, 128.7, 126.6, 114.3, 55.3, 44.7. IR (neat,  $\text{cm}^{-1}$ ): 3055, 3024, 3000, 2928, 1692, 1514, 1447, 1035, 793, 756. Anal. Calcd. for  $\text{C}_{15}\text{H}_{14}\text{O}_2$ : C, 79.62; H, 6.24. Found: C, 79.58; H, 6.19.

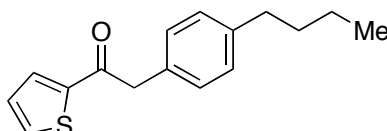

**2-(4-Butylphenyl)-1-(thiophen-2-yl)ethanone** (Table 2, Entry 2). General procedure A was employed as described. A colorless liquid (114 mg, 88 %) was isolated by column chromatography (90:10 Hex:EtOAc).  $^1\text{H}$  NMR (400 MHz,  $\text{CDCl}_3$ )  $\delta$ : 7.77 (dd,  $J = 3.8, 1.1$  Hz, 1 H), 7.63 (dd,  $J = 5.0, 1.1$  Hz, 1 H), 7.22 (m, 2 H), 7.12 (m, 3 H), 4.16 (s, 2 H), 2.59 (t,  $J = 7.7$  Hz, 2 H), 1.60 (m, 2 H), 1.36 (m, 2 H), 0.92 (t,  $J = 7.3$  Hz, 3 H).  $^{13}\text{C}$  NMR (100 MHz,  $\text{CDCl}_3$ ):  $\delta$  190.9, 144.1, 141.9, 134.2, 132.8, 131.6, 129.4, 128.9, 128.3, 46.2, 35.4, 33.8, 22.6, 14.1. IR (neat,  $\text{cm}^{-1}$ ): 3052, 3023, 2956, 2928, 2857, 1659, 1515, 1414, 1356, 1059, 724.

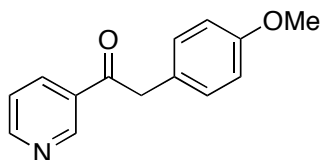

**2-(4-Methoxyphenyl)-1-(pyridin-3-yl)ethanone** (Table 2, Entry 3). General procedure A was employed as described with the exception that 3 mL of toluene were used. A white powder was isolated (92 mg, 81 %) was isolated by column chromatography (97:3:1  $\text{CH}_2\text{Cl}_2$ :MeOH: $\text{NEt}_3$ ). Mp: 91-93 °C.  $^1\text{H}$  NMR (400 MHz,  $\text{CDCl}_3$ )  $\delta$ : 9.22 (s, 1 H), 8.75 (dd,  $J = 4.8, 1.8$  Hz, 1 H), 8.24 (dt,  $J = 8.0, 1.8$  Hz, 1 H), 7.39 (dd,  $J = 8.0, 4.8$  Hz, 1 H), 7.39 (d,  $J = 8.4$  Hz, 2 H) 6.85 (d,  $J = 8.4$  Hz, 2 H), 4.22 (s, 2 H), 3.76 (s, 3 H).  $^{13}\text{C}$  NMR (100 MHz,  $\text{CDCl}_3$ ):  $\delta$  196.8, 158.9, 153.5, 150.1, 136.2, 132.0, 130.6, 125.6, 123.9, 114.4, 55.4, 45.1. IR (neat,  $\text{cm}^{-1}$ ): 2958, 2936, 2836, 1691,

1584, 1516, 1030, 797, 705. Anal. Calcd. for C<sub>14</sub>H<sub>13</sub>NO<sub>2</sub>: C, 73.99; H, 5.77. Found: C, 73.30; H, 5.69.

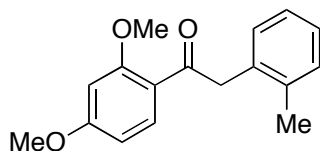

**1-(2,4-Dimethoxyphenyl)-2-*o*-tolylethanone** (Table 2, Entry 4). General procedure B was employed as described. A colorless oil (131 mg, 97 %) was isolated by column chromatography (70:30 Hex:EtOAc). <sup>1</sup>H NMR (400 MHz, CDCl<sub>3</sub>) δ: 7.82 (d, *J* = 8.7 Hz, 1 H), 7.11-7.18 (m, 4 H), 6.54 (dd, *J* = 8.7, 2.3 Hz, 1 H), 6.48 (d, *J* = 2.3 Hz, 1 H), 4.30 (s, 2 H), 3.91 (s, 3 H), 3.86 (s, 3 H), 2.24 (s, 3 H). <sup>13</sup>C NMR (100 MHz, CDCl<sub>3</sub>): δ 197.8, 164.6, 160.8, 137.2, 134.9, 133.1, 130.4, 130.2, 127.0, 126.0, 121.3, 105.4, 98.5, 55.73, 55.67, 48.6, 20.0. IR (neat, cm<sup>-1</sup>): 3064, 3015, 2967, 2943, 2840, 1667, 1601, 1464, 1257, 1214, 835, 745.

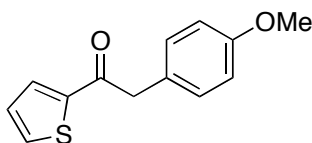

**2-(4-Methoxyphenyl)-1-(thiophen-2-yl)ethanone** (Table 2, Entry 5). General procedure A was employed as described. A white solid (108 mg, 93 %) was isolated by column chromatography (85:15 Hex:EtOAc). Mp: 78-80 °C. <sup>1</sup>H NMR (400 MHz, CDCl<sub>3</sub>) δ: 7.76 (dd, *J* = 3.8, 1.1 Hz, 1 H), 7.63 (dd, *J* = 5.0, 1.1 Hz, 1 H), 7.22 (m, 2 H), 7.12 (m, 1 H), 6.85 (m, 2 H), 4.13 (s, 2 H), 3.79 (s, 3 H). <sup>13</sup>C NMR (100 MHz, CDCl<sub>3</sub>): δ 191.0, 158.8, 144.0, 134.1, 132.8, 130.6, 128.4, 126.5, 114.3, 55.5, 45.7. IR (neat, cm<sup>-1</sup>): 3102, 3000, 2955, 2933, 2908, 2835, 1657, 1611, 1512, 1414, 1248, 1179. Anal. Calcd. for C<sub>13</sub>H<sub>12</sub>O<sub>2</sub>S: C, 67.21; H, 5.21. Found: C, 67.47; H, 5.27.

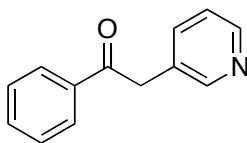

**1-Phenyl-2-(pyridin-3-yl)ethanone** (Table 2, Entry 6).<sup>4</sup> General procedure B was employed as described. A colorless liquid (88 mg, 90 %) was isolated by column chromatography (90:10 Hex:EtOAc). <sup>1</sup>H NMR (400 MHz, CDCl<sub>3</sub>) δ: 8.52 (m, 2 H), 8.01 (d, *J* = 6.3 Hz, 2 H), 7.58 (app. t, *J* = 7.5 Hz, 2 H), 7.48 (app. t, *J* = 7.8 Hz, 2 H), 7.26 (m, 1 H), 4.30 (s, 2 H). <sup>13</sup>C NMR (100 MHz, CDCl<sub>3</sub>): δ 196.6, 150.8, 148.6, 137.4, 136.4, 133.8, 130.3, 129.0, 128.6, 123.6, 42.5.

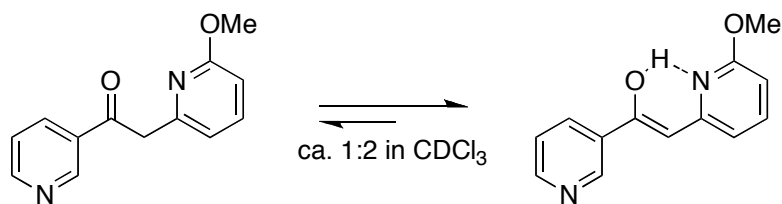

**2-(6-Methoxypyridin-2-yl)-1-(pyridin-3-yl)ethanone** (Table 2, Entry 7).

General procedure B was employed as described with the exception that 4 mL of toluene were used. A yellow oil (87 mg, 76 %) was isolated by column chromatography (95:5:1 CH<sub>2</sub>Cl<sub>2</sub>:MeOH;NEt<sub>3</sub>) as a 1:2 mixture of tautomers. <sup>1</sup>H NMR (400 MHz, CDCl<sub>3</sub>) δ: 14.12 (s, 2.1 H), 9.33 (dd, *J* = 2.2, 0.8 Hz, 1.0 H), 9.03 (dd, *J* = 2.3, 0.7 Hz, 2.1 H), 8.74 (dd, *J* = 4.8, 1.7 Hz, 1.0 H), 8.58 (dd, *J* = 4.8, 1.6 Hz, 2.1 H), 8.33 (dt, *J* = 8.0, 1.9 Hz, 1.0 H), 8.05 (dt, *J* = 8.0, 1.9 Hz, 2.1 H), 7.56 (dd, *J* = 8.2, 7.5 Hz, 2.1 H), 7.52 (dd, *J* = 8.2, 7.2 Hz, 1.0 H), 7.39 (ddd, *J* = 8.0, 4.8, 0.8 Hz, 1.0 H), 7.32 (ddd, *J* = 8.0, 4.8, 0.8 Hz, 2.1 H), 6.86 (d, *J* = 7.2 Hz, 1.0 H), 6.71 (d, *J* = 7.2 Hz, 2.1 H), 6.59 (d, *J* = 8.2 Hz, 1.0 H), 6.55 (d, *J* = 8.2 Hz, 2.1 H), 6.08 (s, 2.1 H), 4.36 (s, 2.0 H), 4.00 (s, 6.6 H), 3.80 (s, 3.0 H). <sup>13</sup>C NMR (100 MHz, CDCl<sub>3</sub>): δ 196.2, 163.9, 162.0, 158.0, 155.5, 153.6, 152.0, 151.0, 150.1, 147.1, 140.0, 139.4, 136.4, 132.7, 132.1, 131.7, 123.7, 123.4, 116.7, 114.5, 109.3, 107.4, 97.0, 53.8, 53.5, 48.6. IR (neat, cm<sup>-1</sup>): 3410, 3035, 2979, 2910, 1690, 1584, 1440.

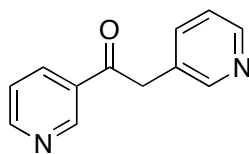

**1,2-Di(pyridin-3-yl)ethanone** (Table 2, Entry 8).

General procedure B was employed as described. A pale yellow solid (84 mg, 85 %) was isolated by column chromatography (94:6 CH<sub>2</sub>Cl<sub>2</sub>:MeOH). Mp: 82-84 °C. <sup>1</sup>H NMR (400 MHz, CDCl<sub>3</sub>) δ: 9.24 (m, 1 H), 8.80 (dd, *J* = 4.8, 1.7 Hz, 1 H), 8.53 (dd, *J* = 4.8, 1.6 Hz, 1 H), 8.51 (d, *J* = 1.9 Hz, 1 H), 8.26 (dt, *J* = 8.0, 2.0 Hz, 1 H), 7.59 (dt, *J* = 7.9, 2.0 Hz, 1 H), 7.44 (ddd, *J* = 7.9, 4.8, 0.8 Hz, 1 H), 7.28 (dd, *J* = 7.4, 4.8 Hz, 1 H), 4.32 (s, 2 H). <sup>13</sup>C NMR (100 MHz, CDCl<sub>3</sub>): δ 195.5, 154.1, 150.8, 150.0, 148.9, 137.4, 135.9, 131.7, 129.4, 124.0, 123.7, 42.8. IR (neat, cm<sup>-1</sup>): 3035, 2915, 1692, 1586, 1481, 1421, 1336, 704. Anal. Calcd. for C<sub>12</sub>H<sub>10</sub>N<sub>2</sub>O: C, 72.71; H, 5.08. Found: C, 72.52; H, 5.13.

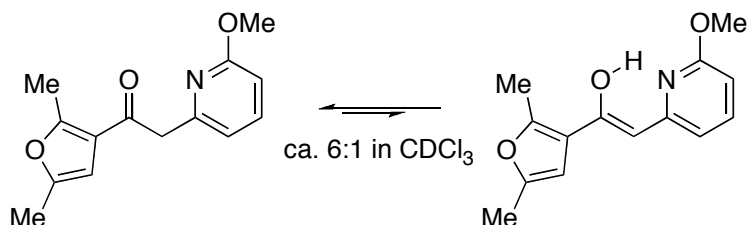

**1-(2,5-Dimethylfuran-3-yl)-2-(6-methoxypyridin-2-yl)ethanone** (Table 2, Entry 9).

General procedure B was employed as described with the exception that 3 mL of toluene were used. A colorless oil (95 mg, 78 %) was isolated by column chromatography (85:15 Hex:EtOAc) as a 6:1 mixture of tautomers. <sup>1</sup>H NMR (400 MHz,

CDCl<sub>3</sub>)  $\delta$ : 13.8 (s, 0.15 H), 7.45-7.51 (m, 1.0 H), 6.81, (d,  $J$  = 7.6 Hz, 0.85 H), 6.58 (d,  $J$  = 8.4 Hz, 0.85 H), 6.56 (d,  $J$  = 7.6 Hz, 0.15 H), 6.43 (d,  $J$  = 8.4 Hz, 0.15 H), 6.34 (s, 0.85 H), 6.08 (s, 0.15 H), 5.57 (s, 0.15 H), 4.05 (s, 1.70 H), 3.96 (s, 0.45 H), 3.87 (s, 2.55 H), 2.54 (s, 2.55 H), 2.53 (s, 0.45 H), 2.23 (s, 0.45 H), 2.22 (s, 2.55 H). <sup>13</sup>C NMR (100 MHz, CDCl<sub>3</sub>):  $\delta$  193.4, 163.9, 161.9, 158.0, 157.8, 156.7, 153.0, 150.1, 149.9, 139.7, 139.1, 121.7, 117.8, 116.7, 113.4, 108.7, 106.4, 106.2, 105.7, 104.9, 95.7, 53.7, 53.4, 50.7, 14.5, 14.2, 13.5, 13.3. IR (neat, cm<sup>-1</sup>): 3402, 3073, 2981, 2950, 2923, 1677, 1600, 1577, 1468, 1033, 736.

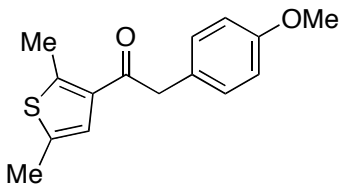

**1-(2,5-Dimethylthiophen-3-yl)-2-(4-methoxyphenyl)ethanone** (Table 2, Entry 10). General procedure A was employed as described with the exception that 3 mL of toluene were used. A colorless liquid that solidified into a white solid (107 mg, 82 %) was isolated by column chromatography (90:10 Hex:EtOAc) (Mp: 42-43 °C). <sup>1</sup>H NMR (400 MHz, CDCl<sub>3</sub>)  $\delta$ : 7.15 (d,  $J$  = 8.7 Hz, 2 H), 7.07 (s, 1 H), 6.88 (d,  $J$  = 8.7 Hz, 2 H), 4.03 (s, 2 H), 3.79 (s, 3 H), 2.66 (s, 3 H), 2.41 (s, 3 H). <sup>13</sup>C NMR (100 MHz, CDCl<sub>3</sub>):  $\delta$  194.1, 158.6, 148.6, 135.3, 135.2, 130.7, 126.9, 126.3, 114.2, 55.4, 47.7, 16.3, 15.2. IR (neat, cm<sup>-1</sup>): 3033, 2996, 2954, 2920, 2834, 1665, 1613, 1512, 1479, 1248, 1126, 1035. Anal. Calcd. for C<sub>15</sub>H<sub>16</sub>O<sub>2</sub>S: C, 69.20; H, 6.19. Found: C, 69.49; H, 6.24.

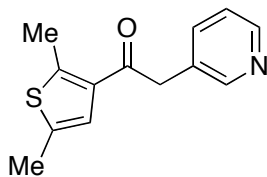

**1-(2,5-Dimethylthiophen-3-yl)-2-(pyridin-3-yl)ethanone** (Table 2, Entry 11). General procedure B was employed as described with the exception that 3 mL of toluene were used. A pale yellow oil (98 mg, 85 %) was isolated by column chromatography (50:50 Hex:EtOAc). <sup>1</sup>H NMR (400 MHz, CDCl<sub>3</sub>)  $\delta$ : 8.50 (dd,  $J$  = 4.8, 1.4 Hz, 1 H), 8.46 (d,  $J$  = 1.7 Hz, 1 H), 7.57 (dt,  $J$  = 7.8, 1.8 Hz, 1 H), 7.26 (m, 1 H), 7.07 (s, 1 H), 4.09 (s, 2 H), 2.64 (s, 3 H), 2.41 (s, 3 H). <sup>13</sup>C NMR (100 MHz, CDCl<sub>3</sub>):  $\delta$  192.4, 150.8, 149.2, 148.4, 137.4, 135.7, 134.7, 130.5, 125.9, 123.5, 45.3, 16.3, 15.2. IR (neat, cm<sup>-1</sup>): 3030, 2953, 2920, 2859, 1669, 1577, 1549, 1479, 1360, 1130, 1028. Anal. Calcd. for C<sub>13</sub>H<sub>13</sub>NOS: C, 67.50; H, 5.66. Found: C, 67.11; H, 5.67.

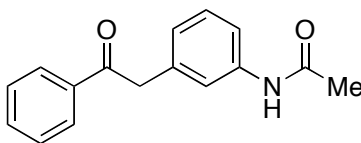

***N*-(3-(2-Oxo-2-phenylethyl)phenyl)acetamide** (Table 2, Entry 12). General procedure B was employed as described with the exception that 3 mL of toluene were used. A white powder (108 mg, 86 %) was isolated by column chromatography (gradient from 50:50 to 25:75 Hex:EtOAc). Mp: 126-128 °C. <sup>1</sup>H NMR (400 MHz, CDCl<sub>3</sub>) δ: 8.15 (s, 1 H), 7.98 (d, *J* = 7.2 Hz, 2 H), 7.54 (t, *J* = 7.8 Hz, 1 H), 7.44 (app. t, *J* = 7.8 Hz, 3 H), 7.33 (d, *J* = 8.0 Hz, 1 H), 7.19 (t, *J* = 7.8 Hz, 1 H), 6.91 (d, *J* = 7.6 Hz, 1 H), 4.22 (s, 2 H), 2.02 (s, 3 H). <sup>13</sup>C NMR (100 MHz, CDCl<sub>3</sub>): δ 198.3, 169.1, 138.7, 136.5, 135.2, 133.6, 129.2, 128.9, 128.7, 125.3, 121.3, 118.7, 45.5, 24.5. IR (neat, cm<sup>-1</sup>): 3313, 3151, 3087, 2919, 1676, 1612, 1595, 1581, 1553, 1491, 1210, 691. Anal. Calcd. for C<sub>16</sub>H<sub>15</sub>NO<sub>2</sub>: C, 75.87; H, 5.97. Found: C, 75.32; H, 6.00.

#### References:

- 1) Biscoe, M. R.; Fors, B. P.; Buchwald, S. L. *J. Am. Chem. Soc.* **2008**, *130*, 6686.
- 2) Hama, T.; Hartwig, J. F. *Org. Lett.* **2008**, *10*, 1549.
- 3) Dittmer, D. C. *J. Org. Chem.* **1959**, *24*, 651.
- 4) Reynolds, S. *J. Am. Chem. Soc.* **1960**, *82*, 472.

# Compound 4

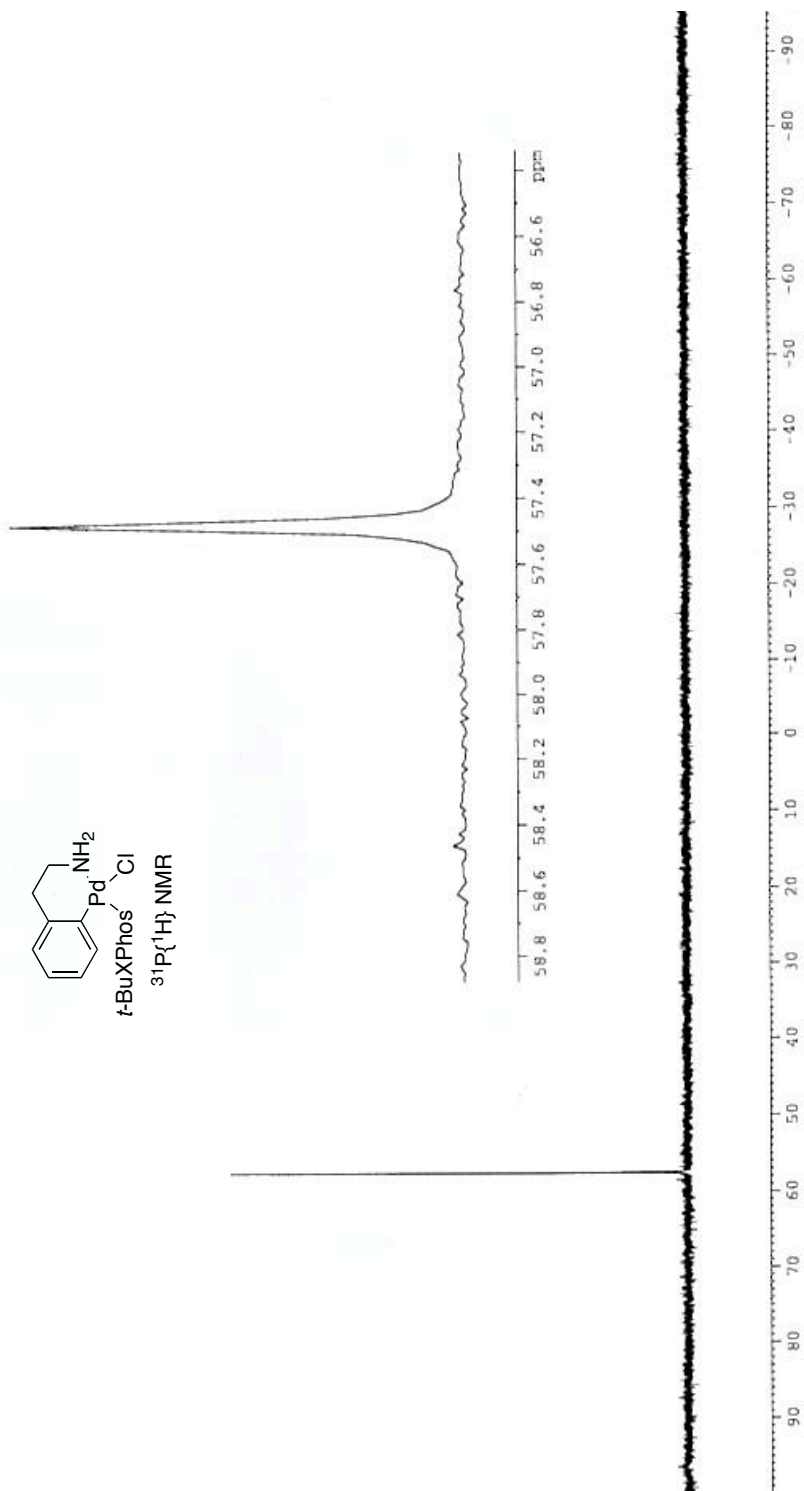

# Compound 4

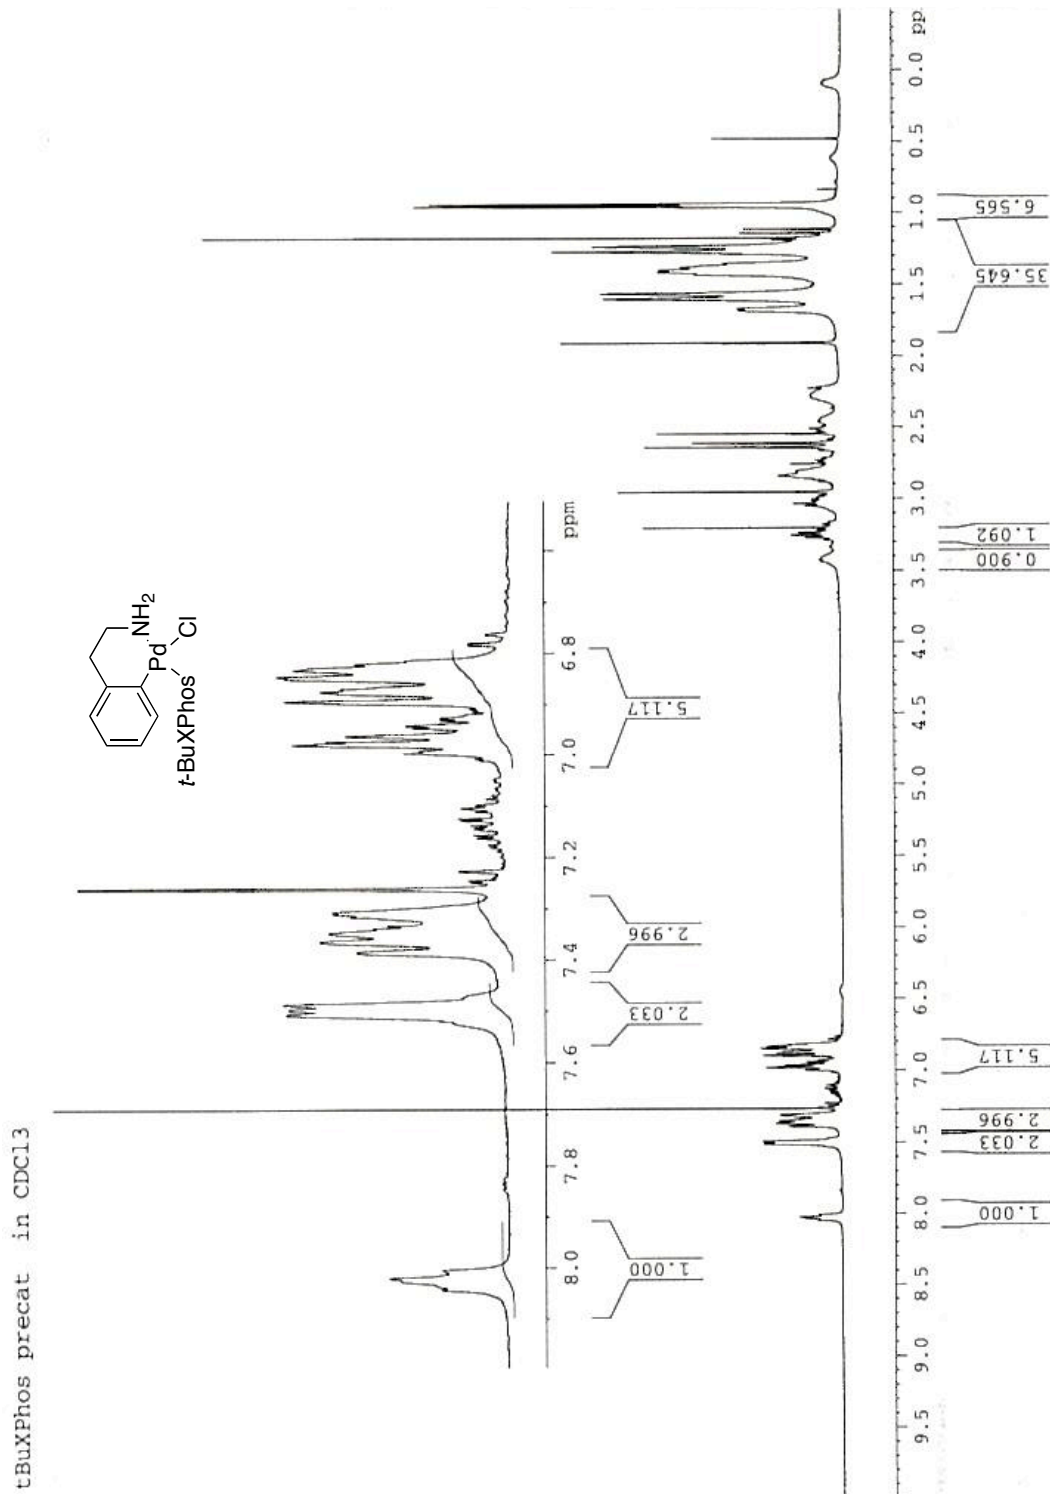



Table 1, Entry 1

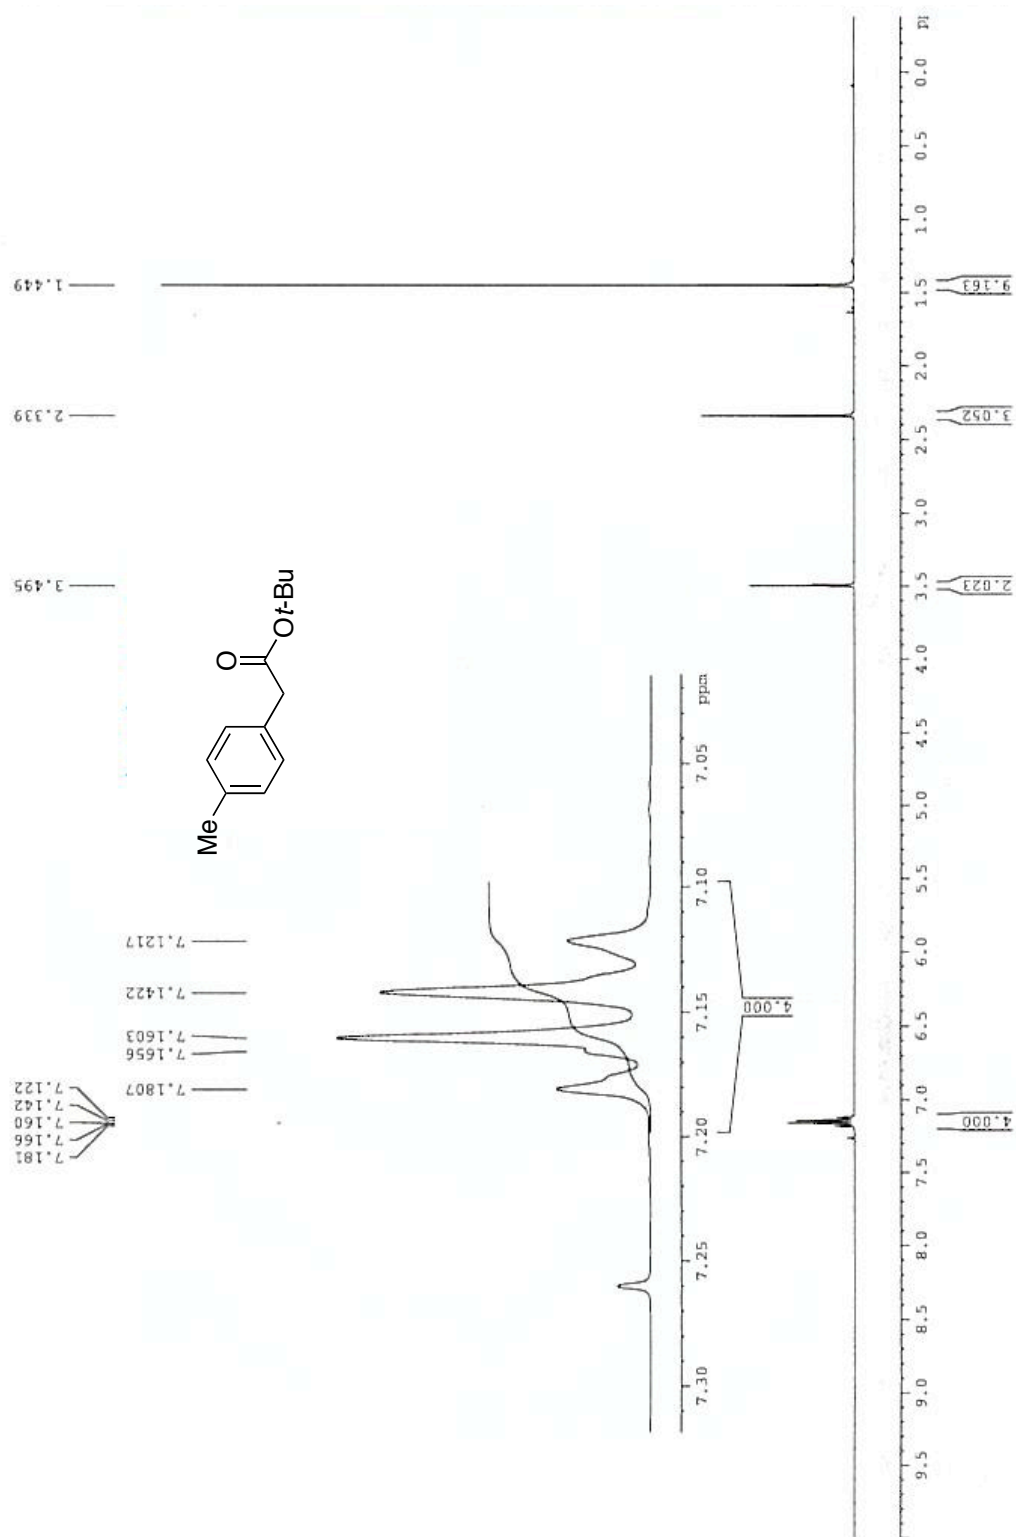

Table 1, Entry 1

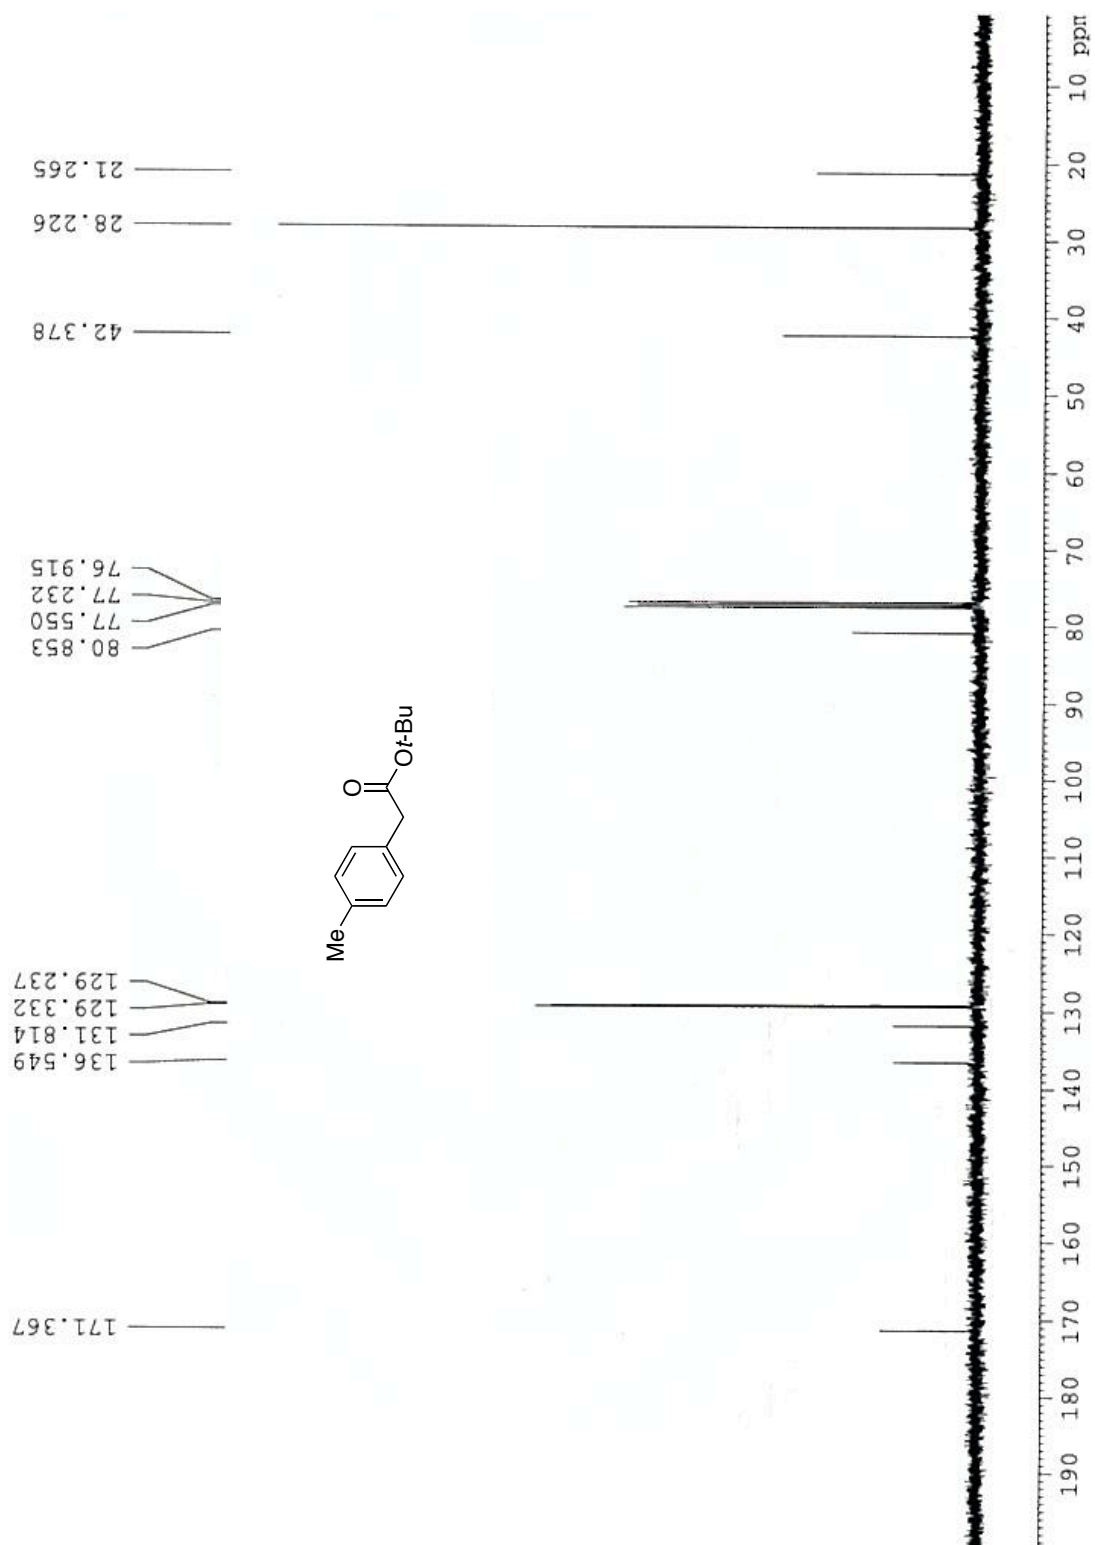

Table 1, Entry 2

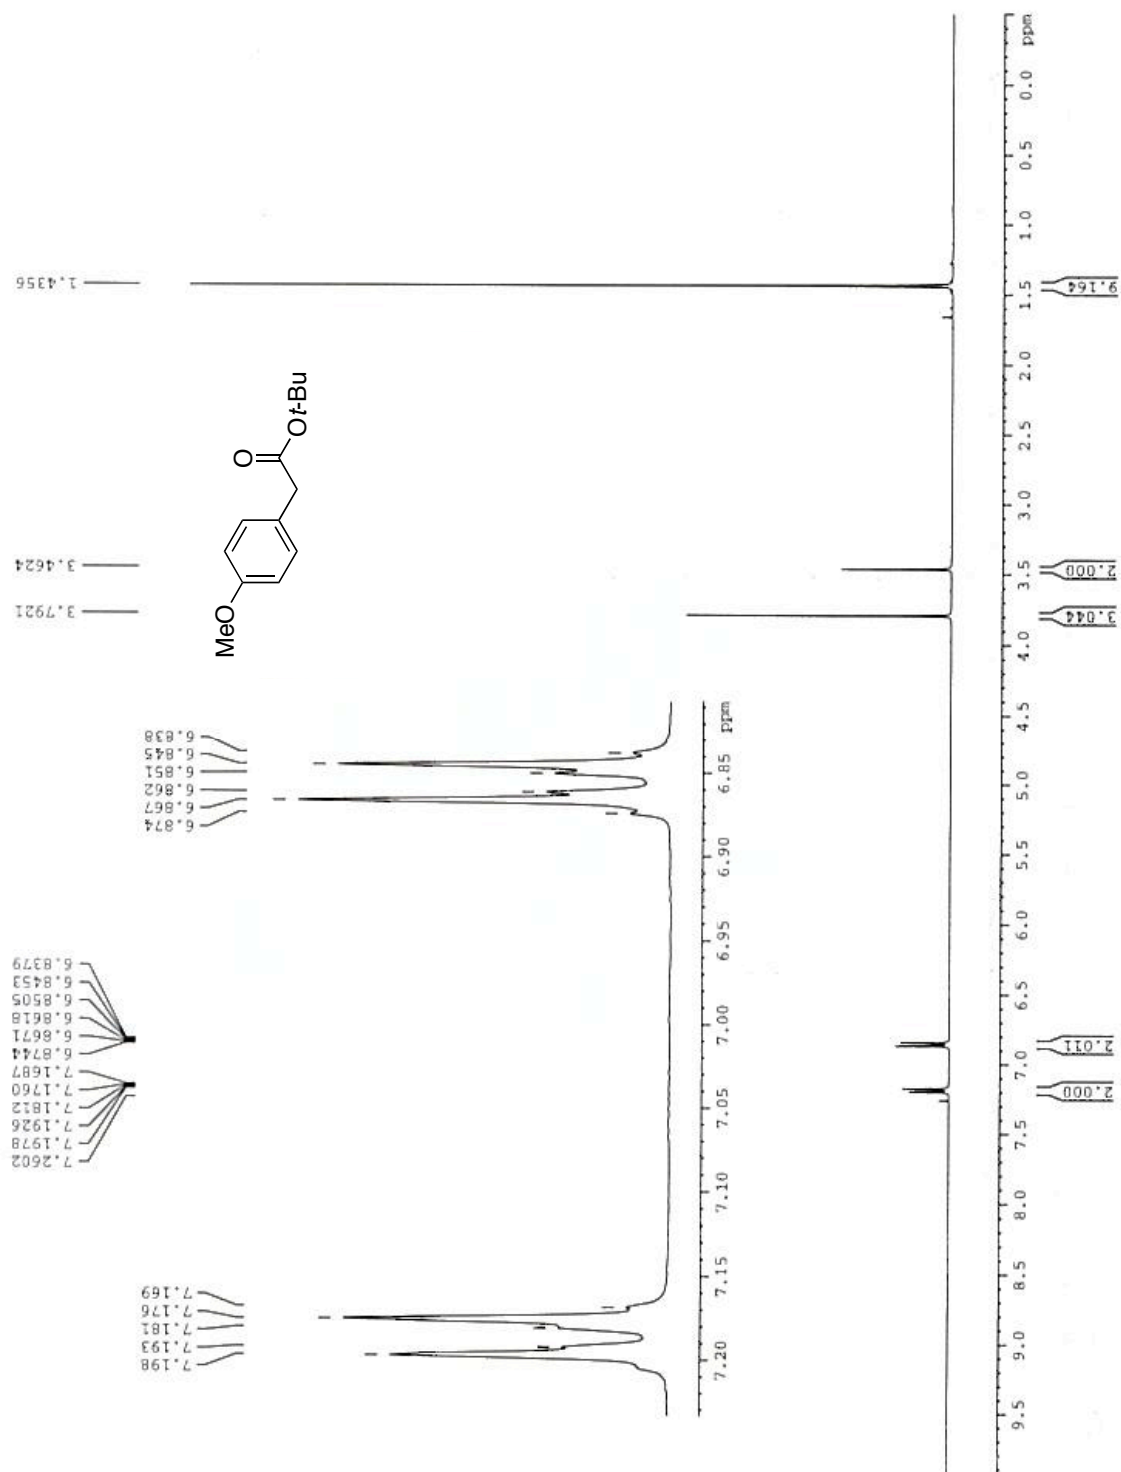

Table 1, Entry 2

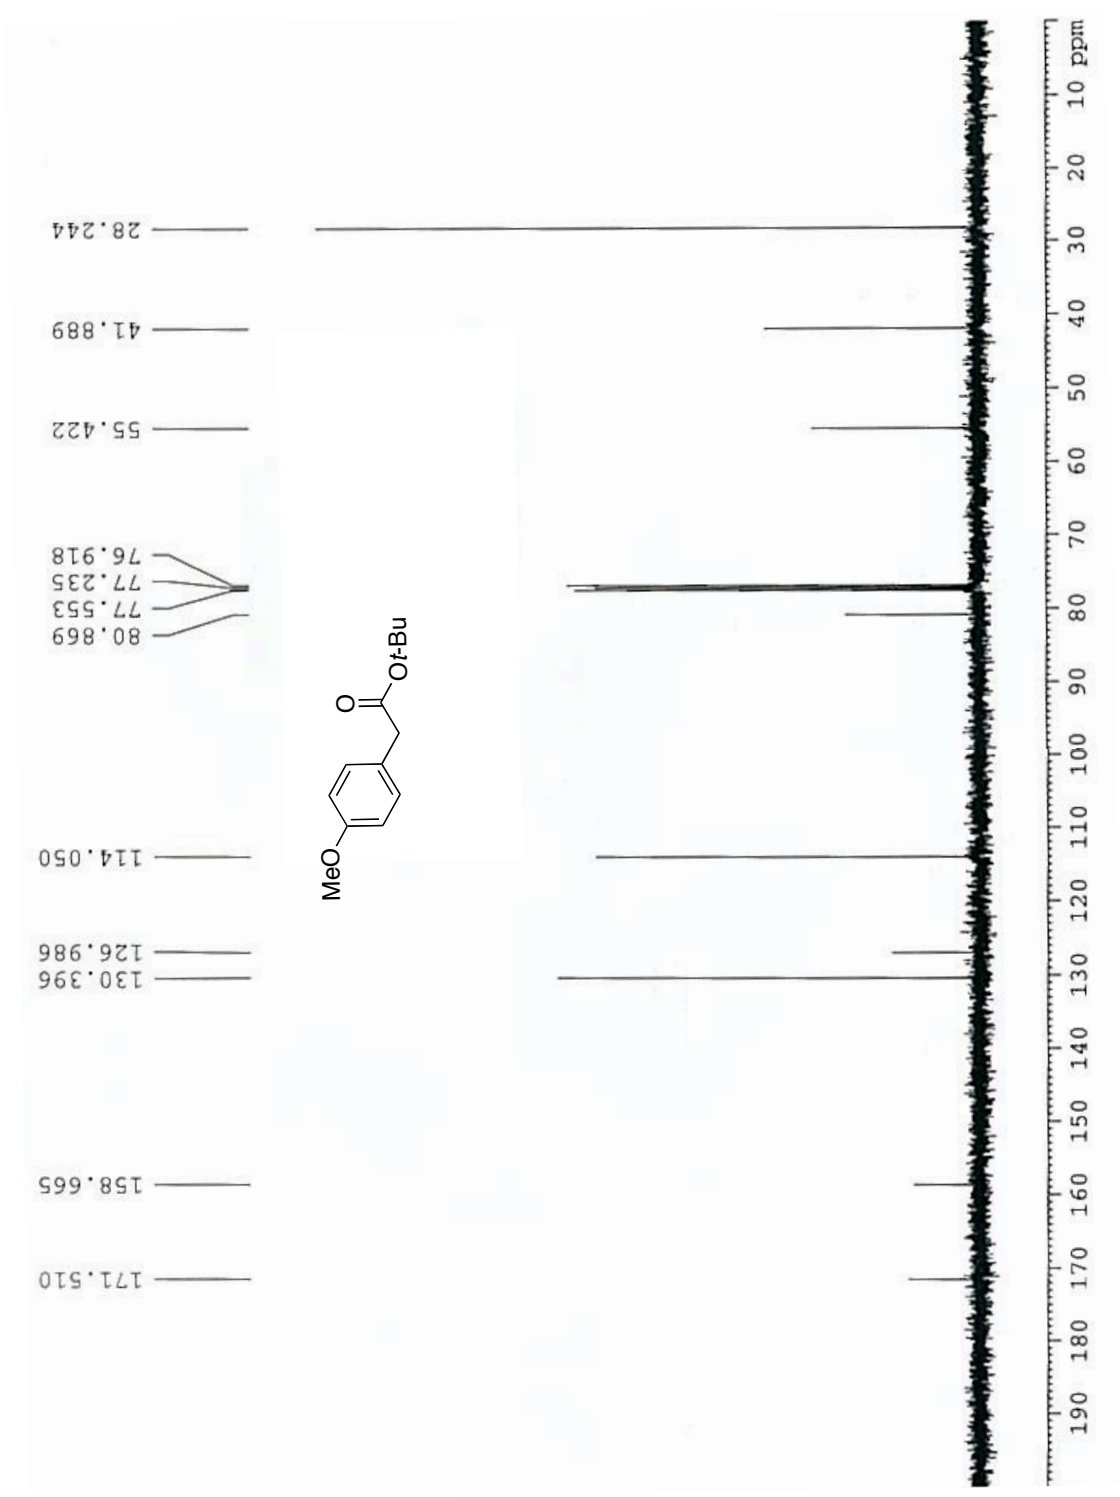

Table 1, Entry 3

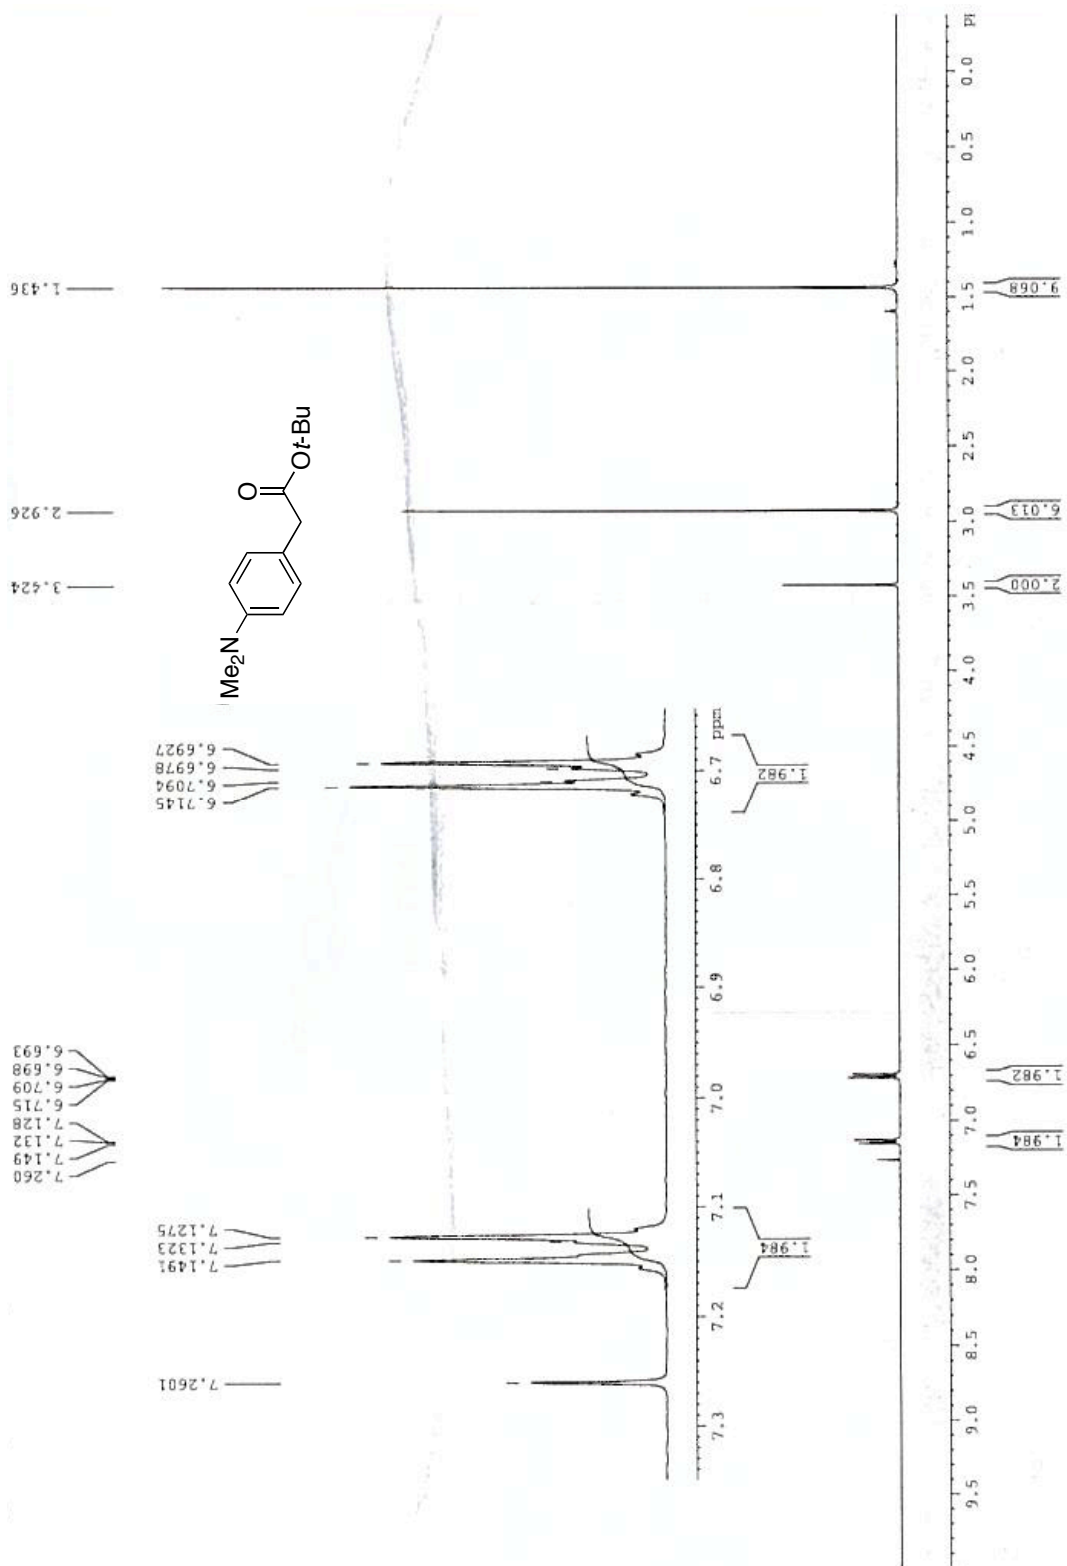

Table 1, Entry 3

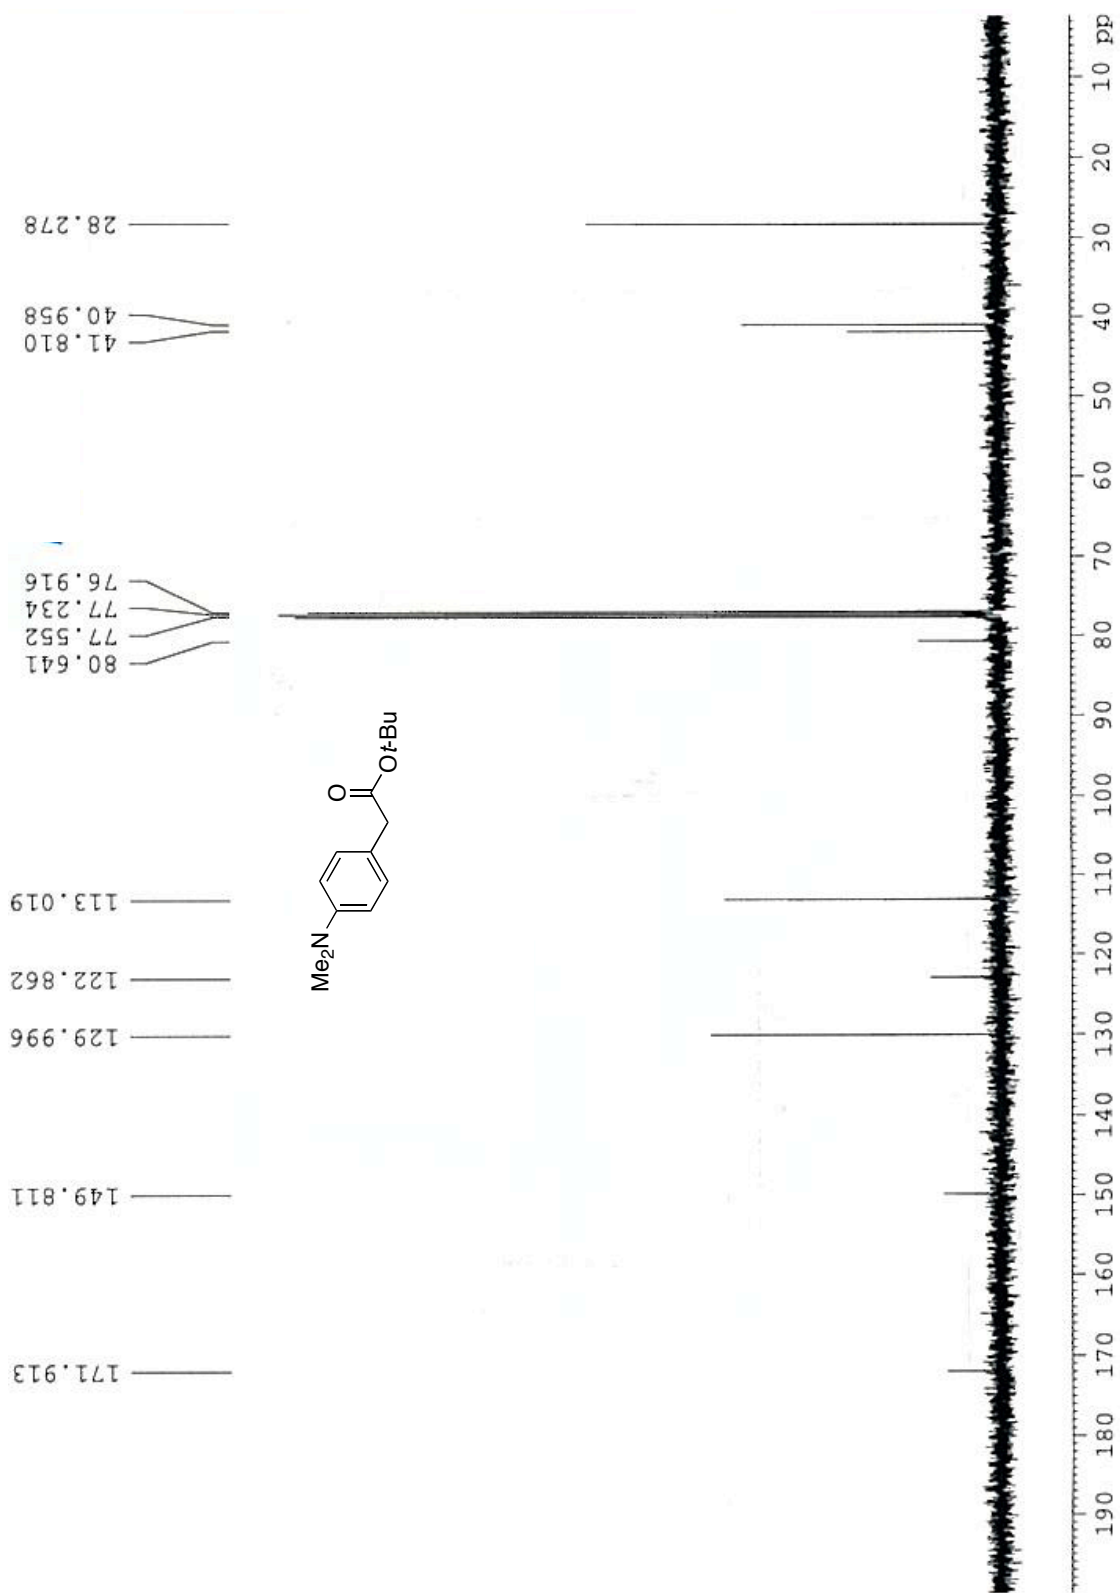

Table 1, Entry 4

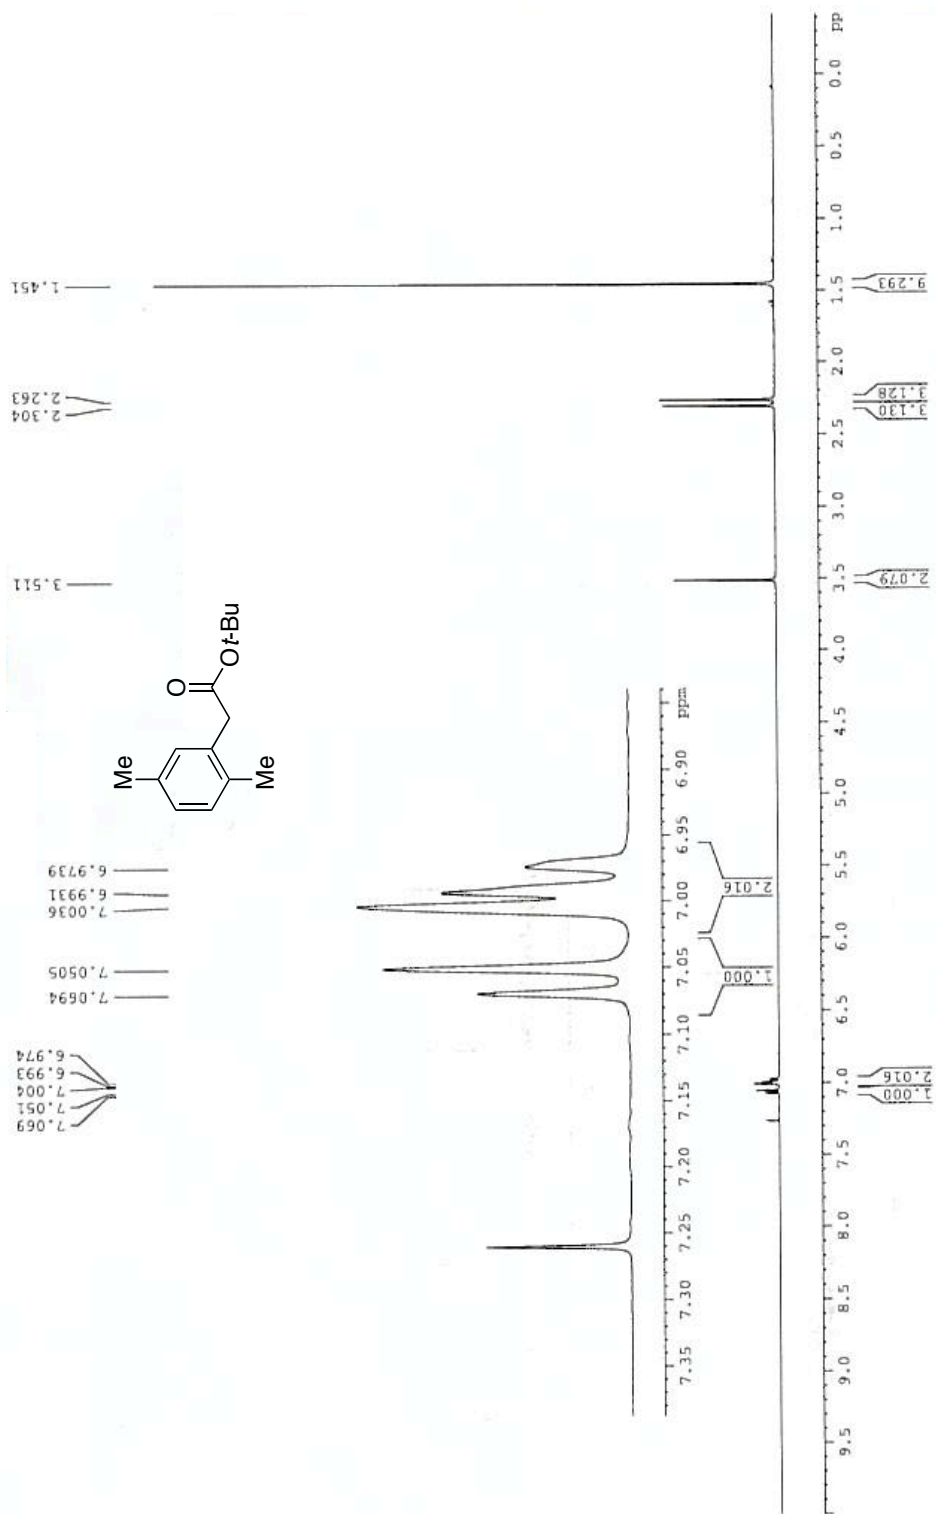

Table 1, Entry 4

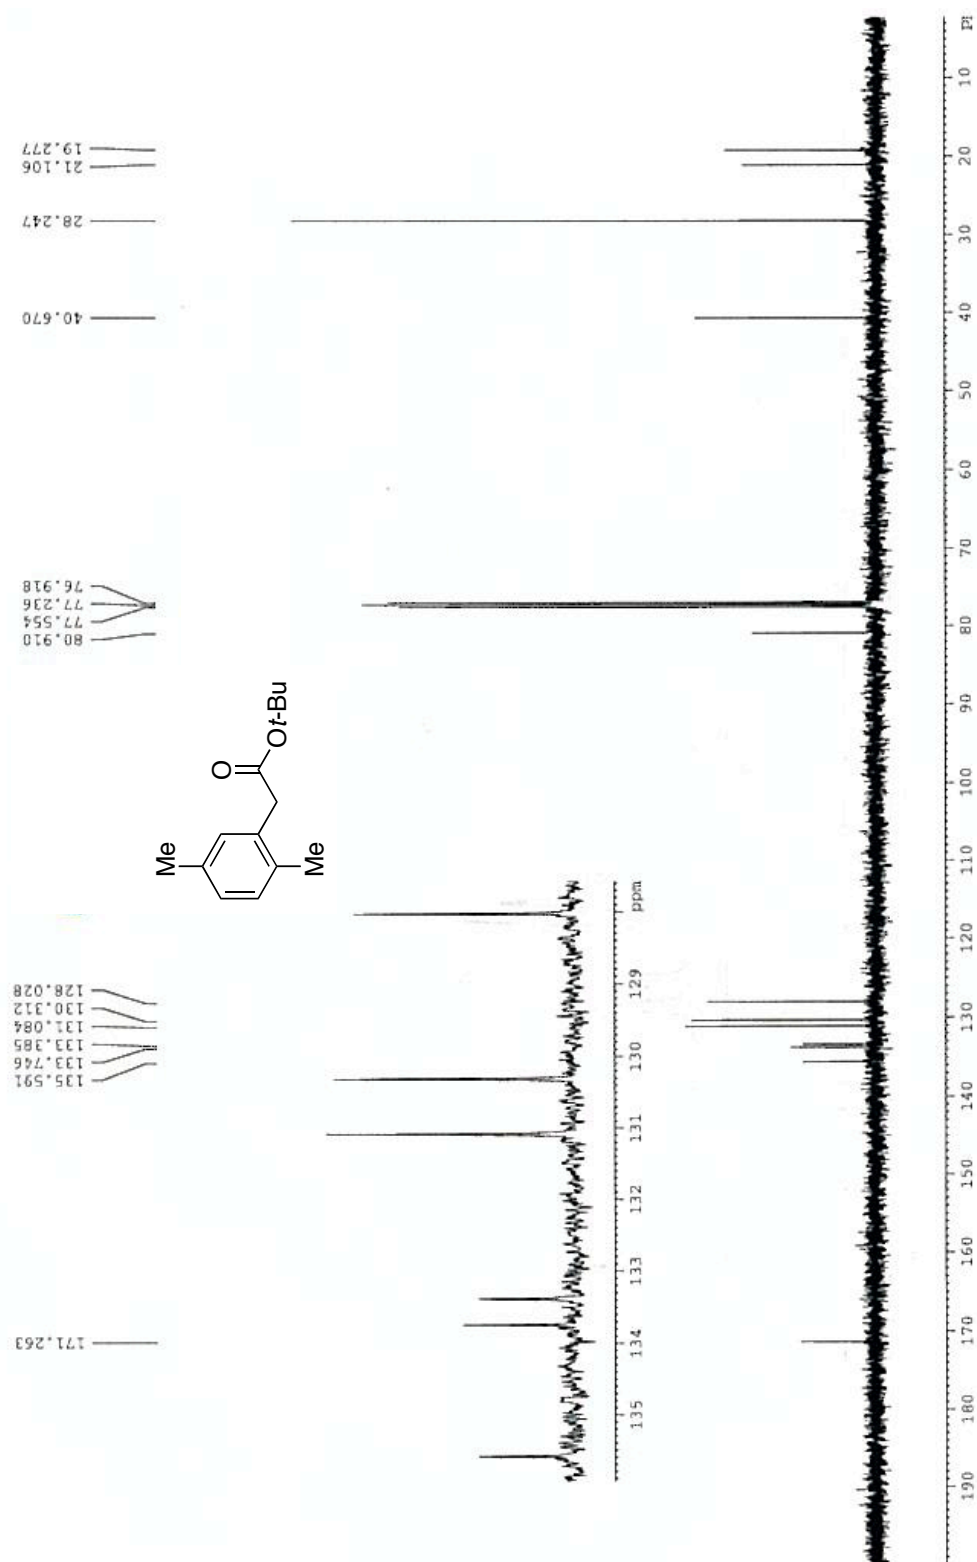



Table 1, Entry 5

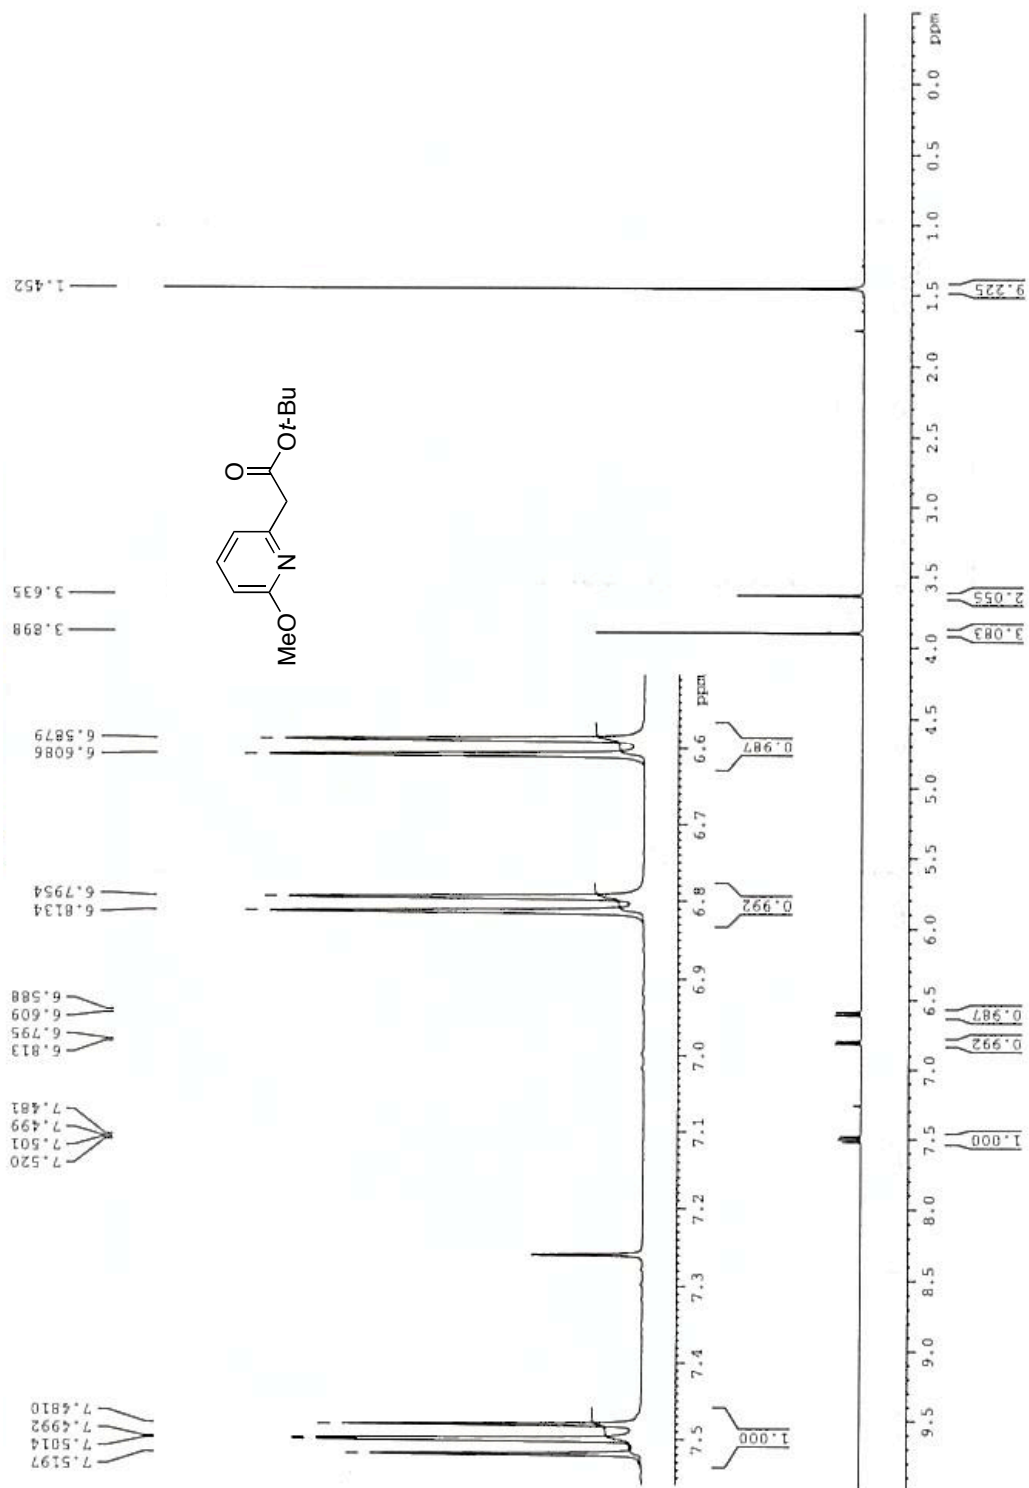

Table 1, Entry 5

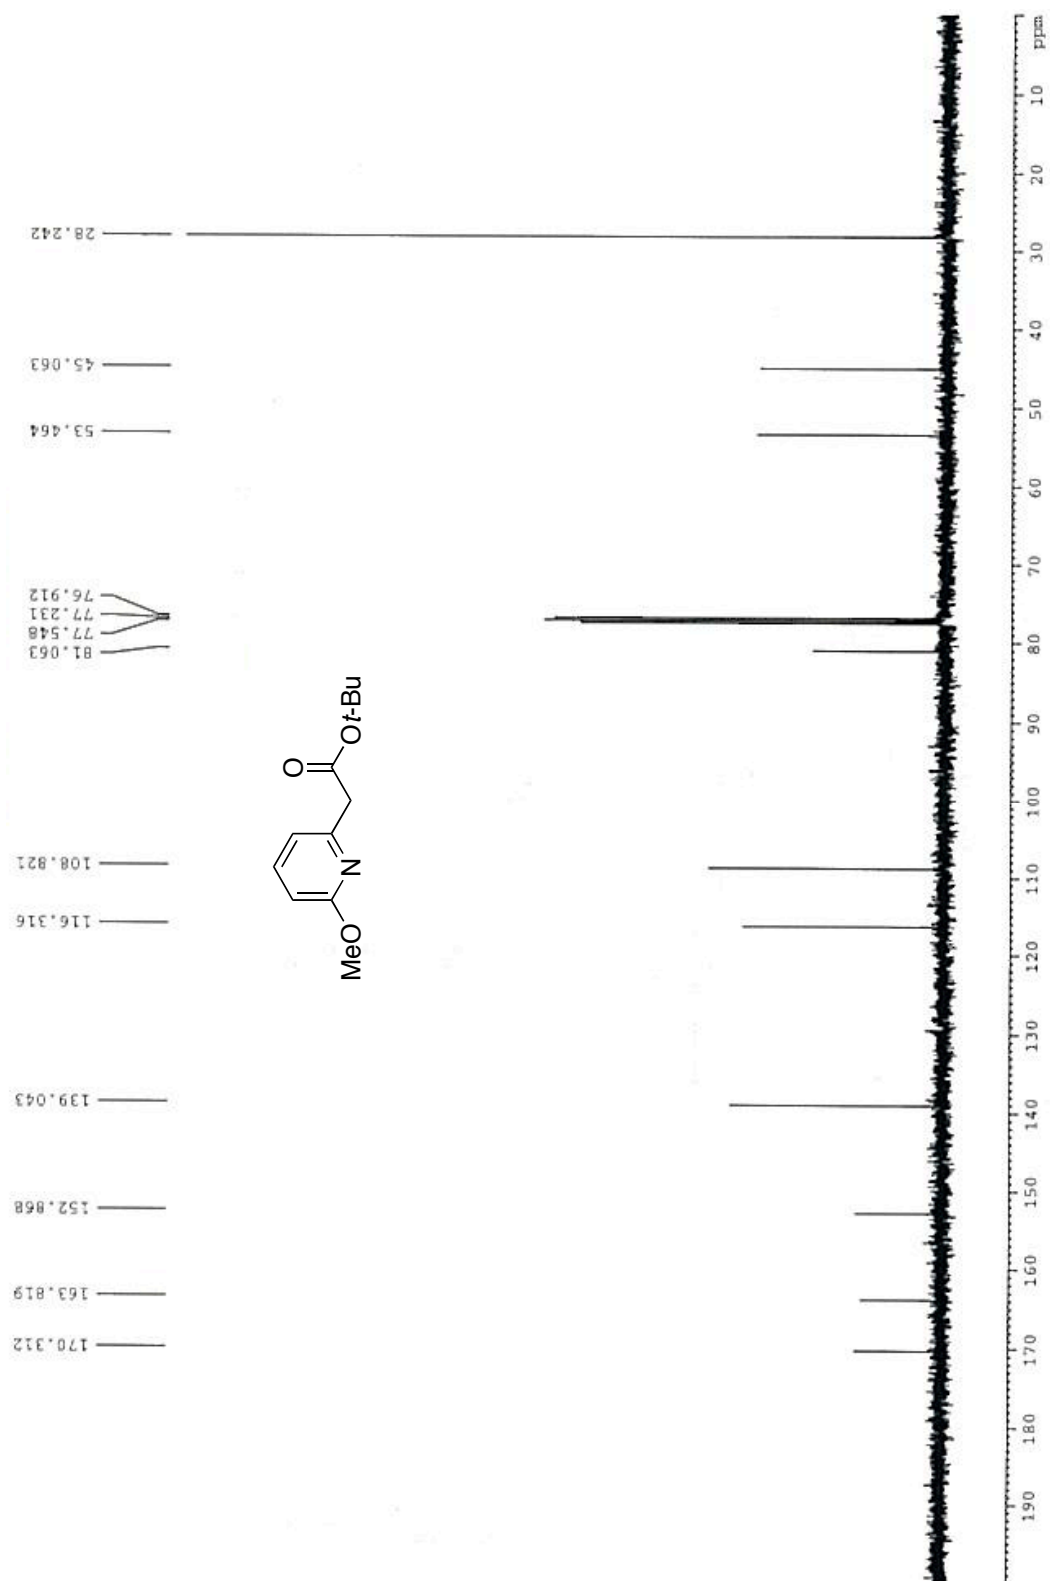

Table 1, Entry 6

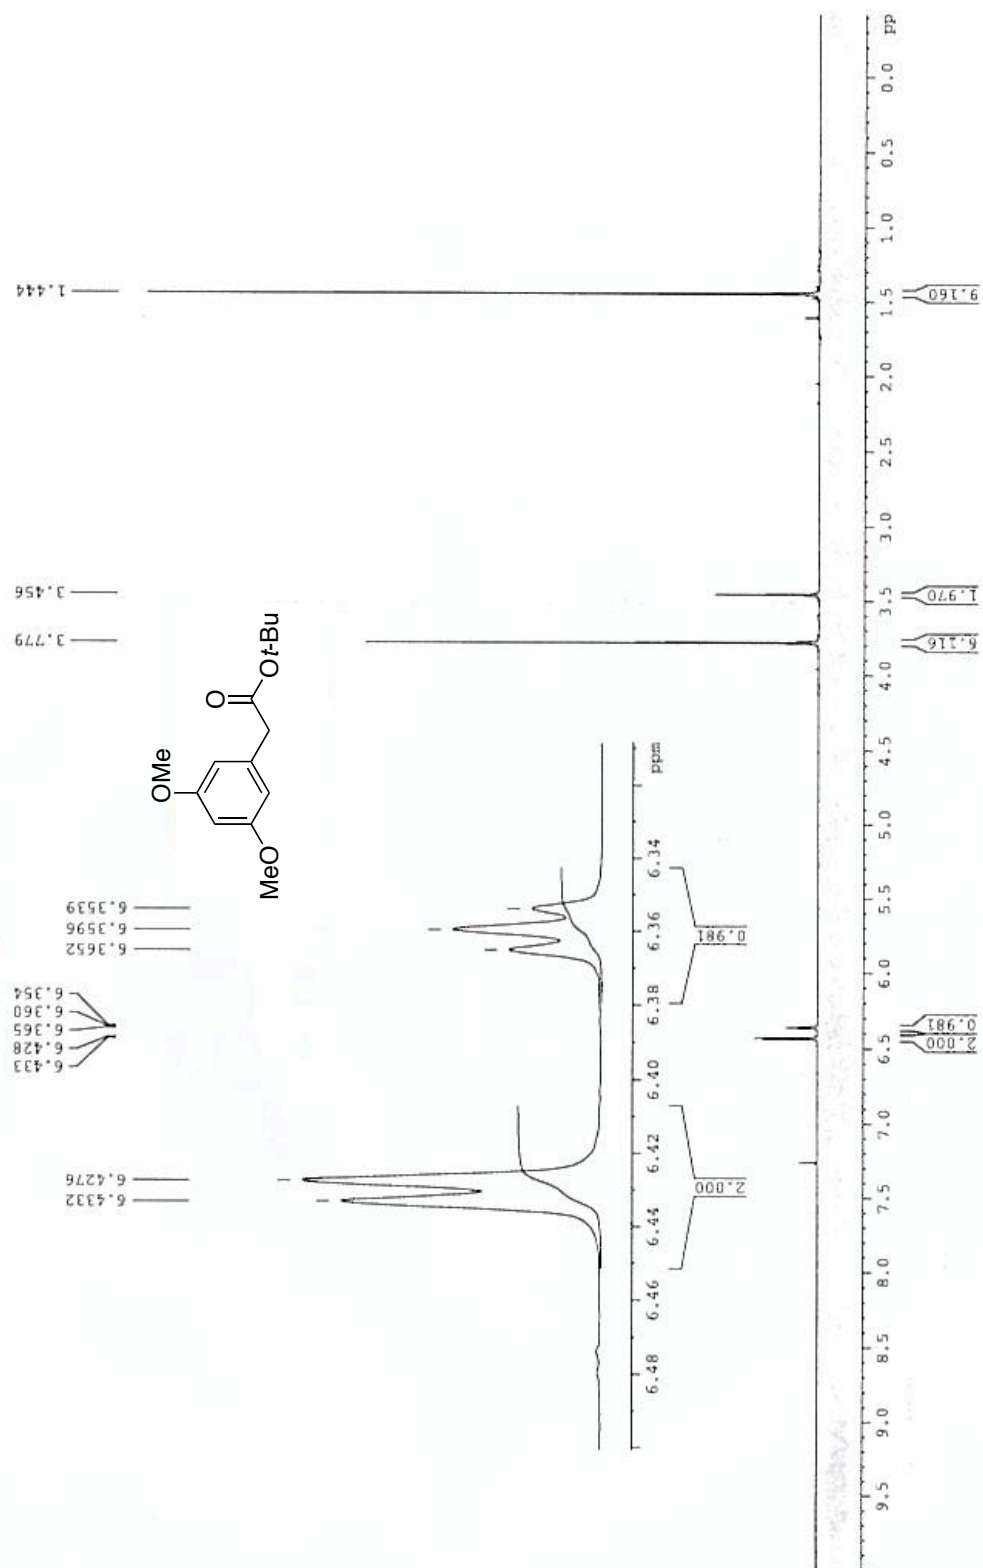

Table 1, Entry 6

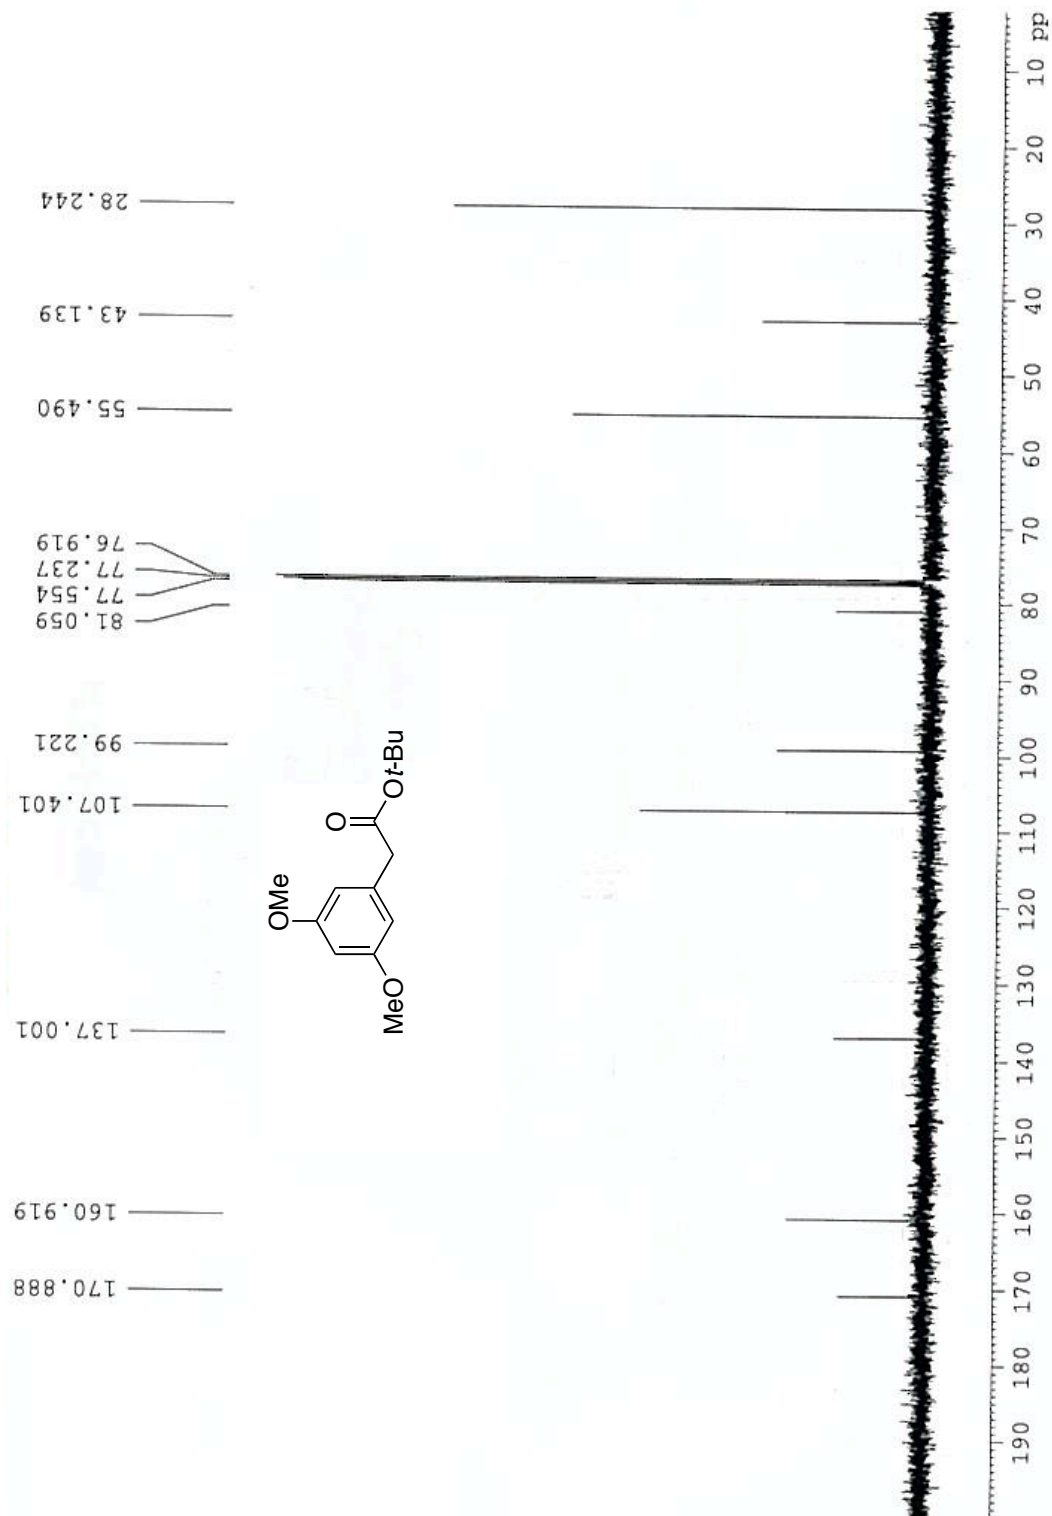

Table 1, Entry 7

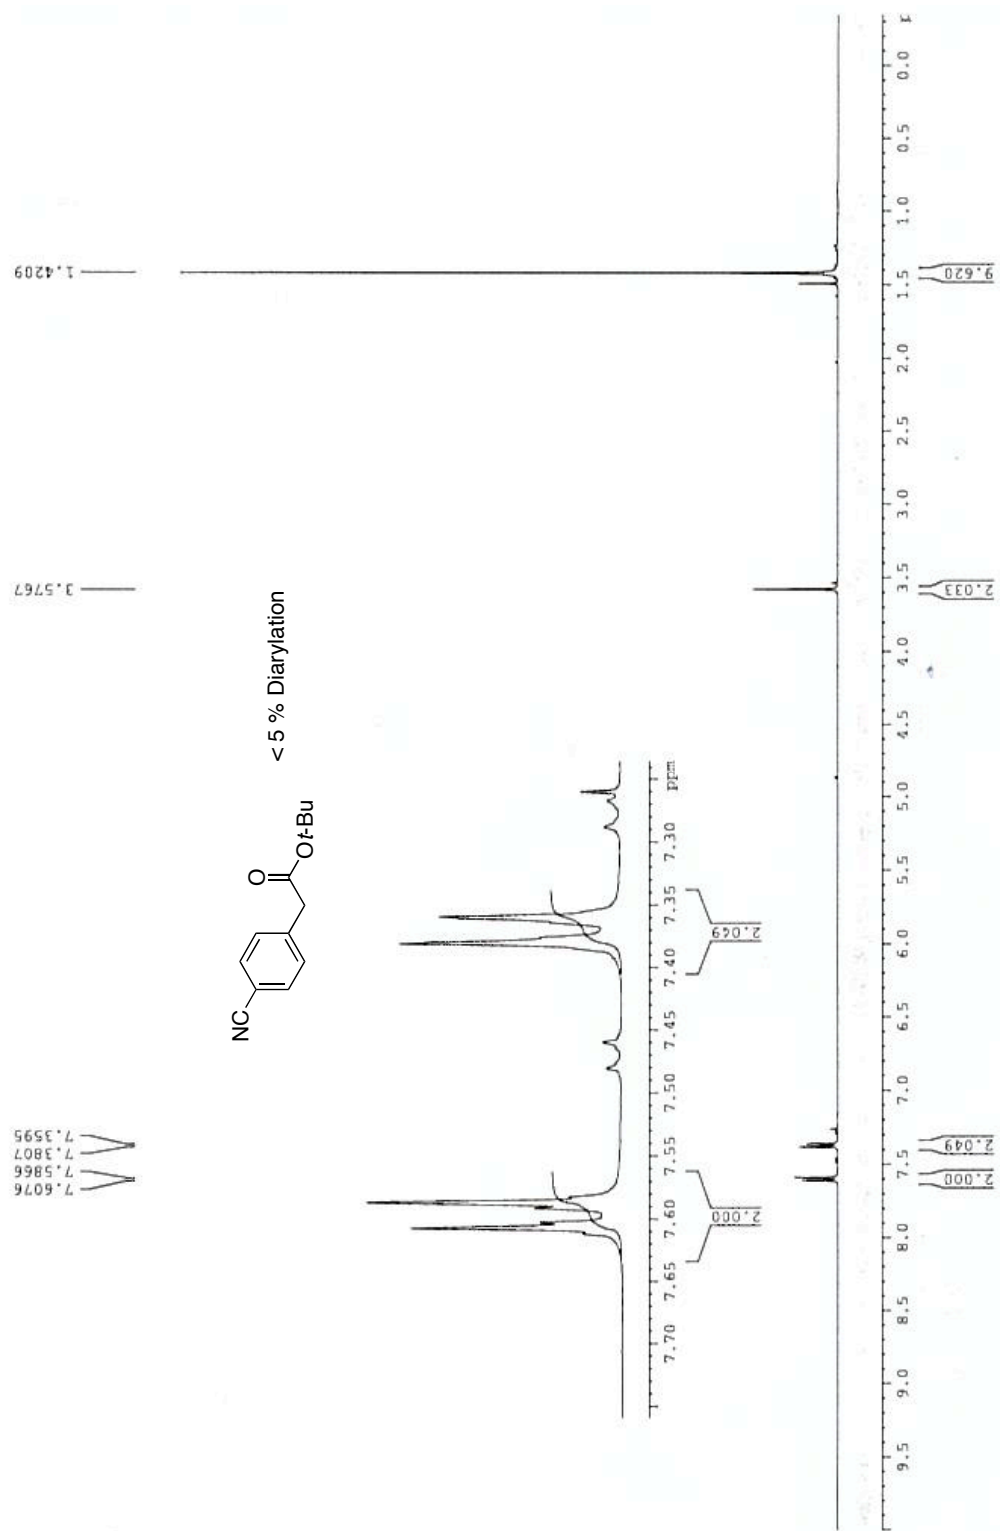

Table 1, Entry 7

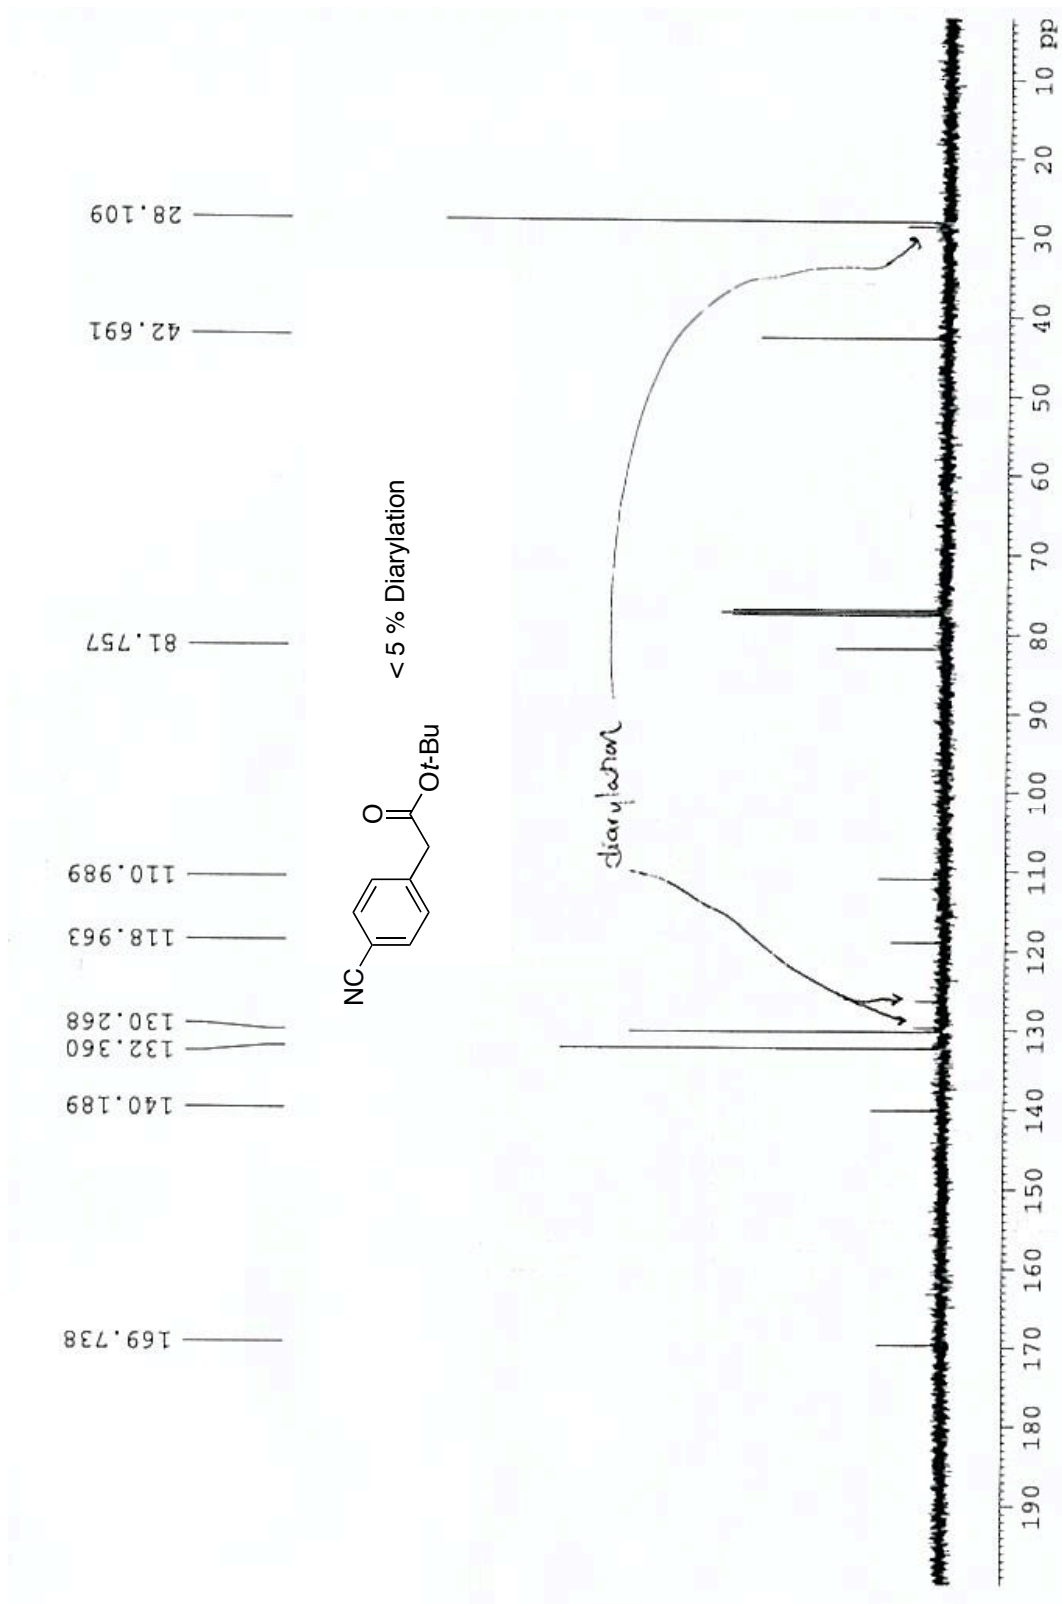

Table 1, Entry 8

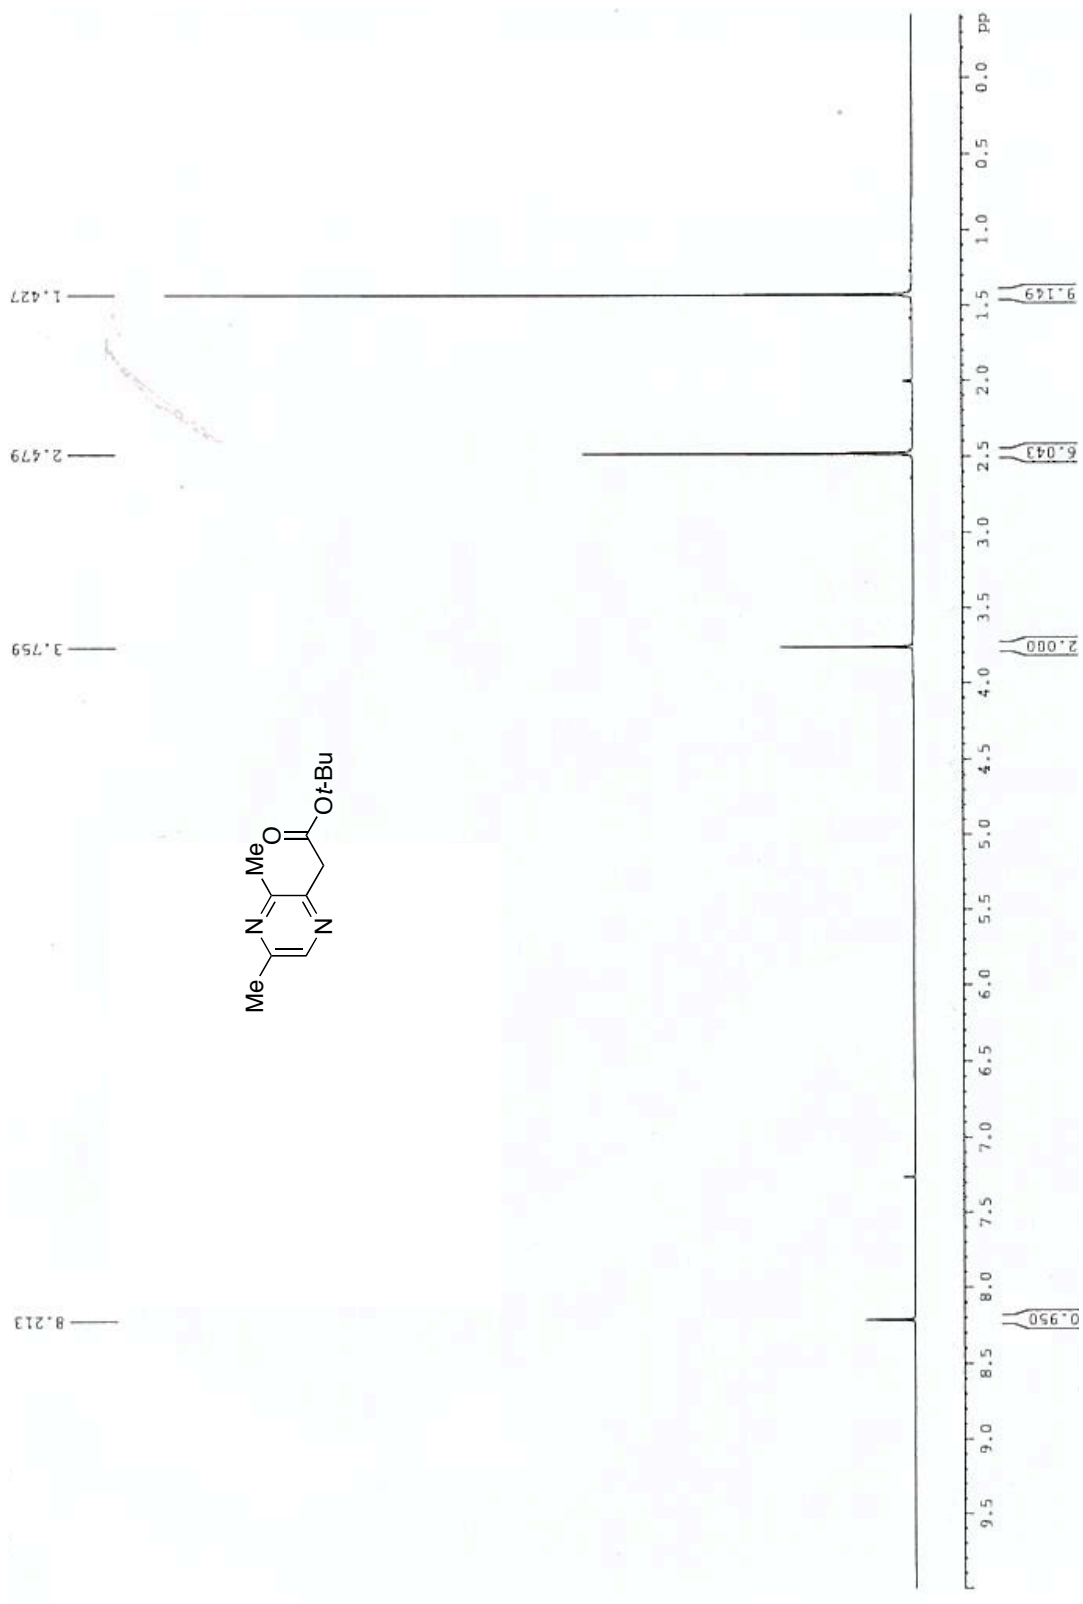

Table 1, Entry 8

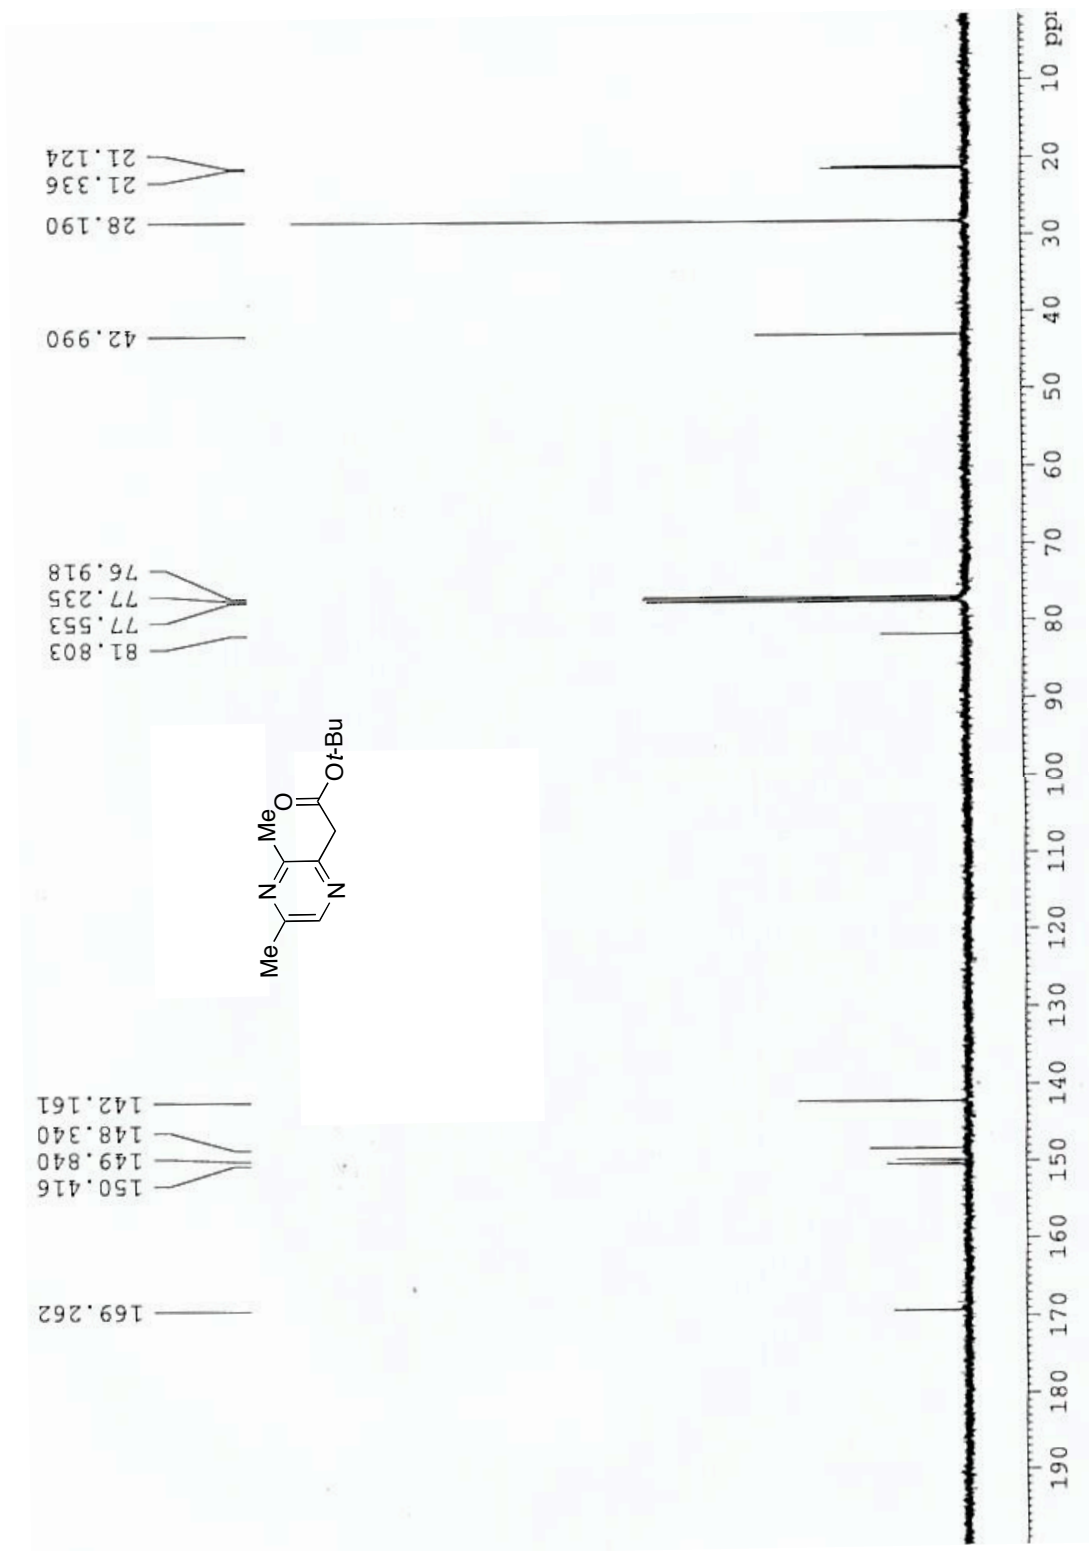



Table 1, Entry 9

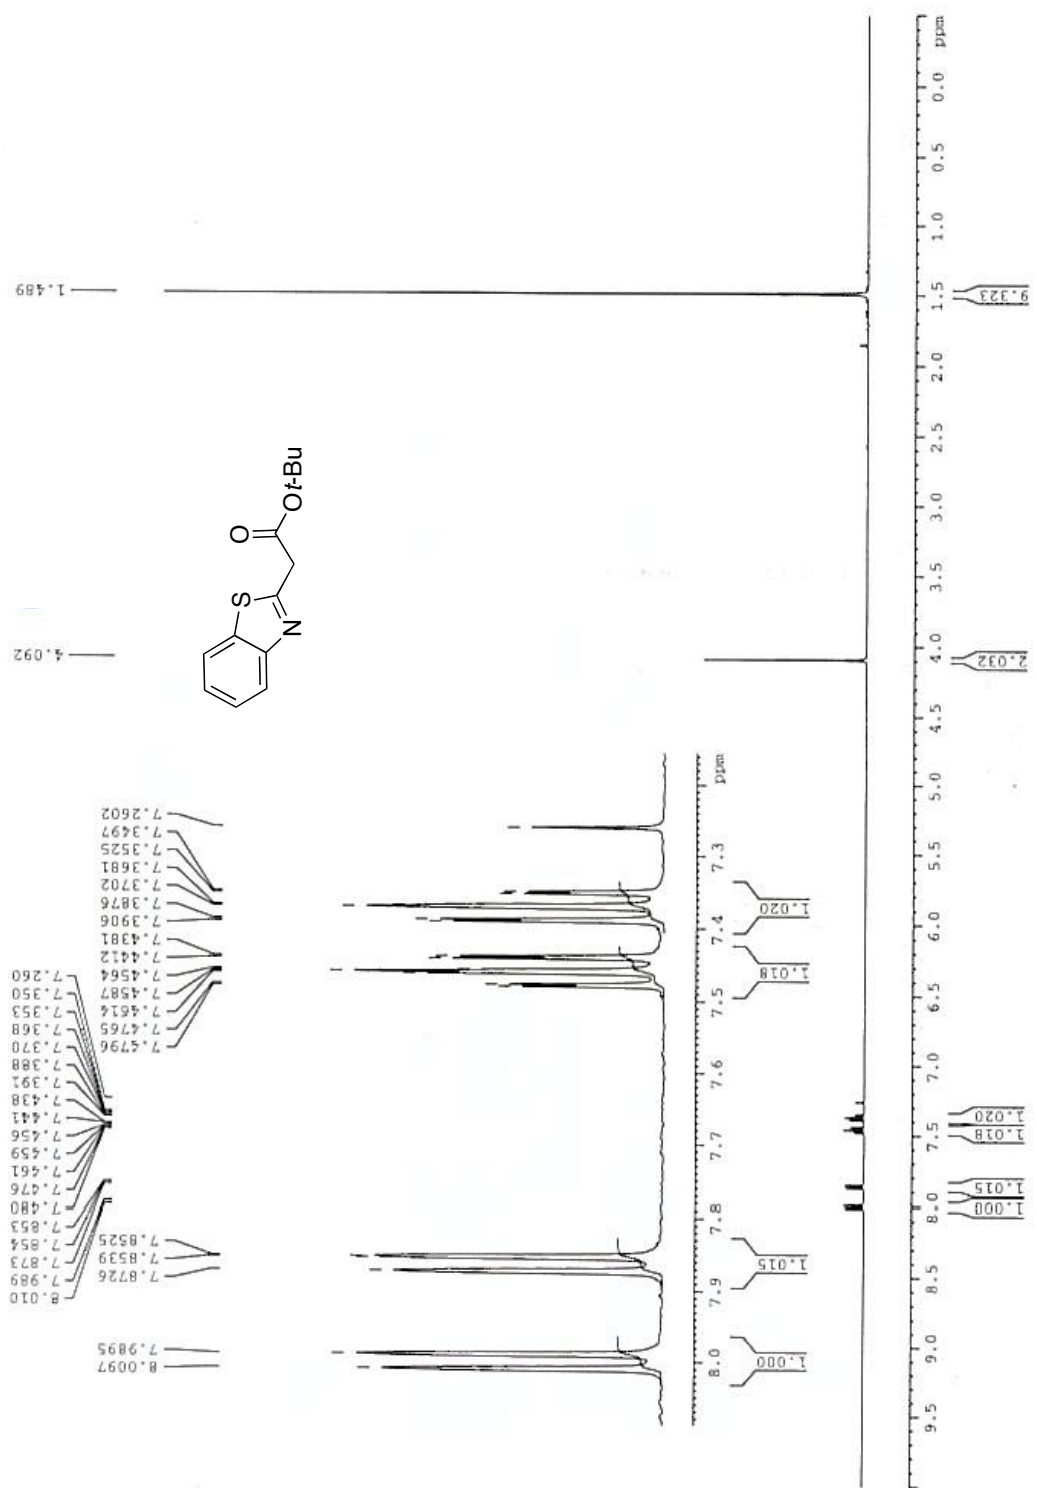

Table 1, Entry 9

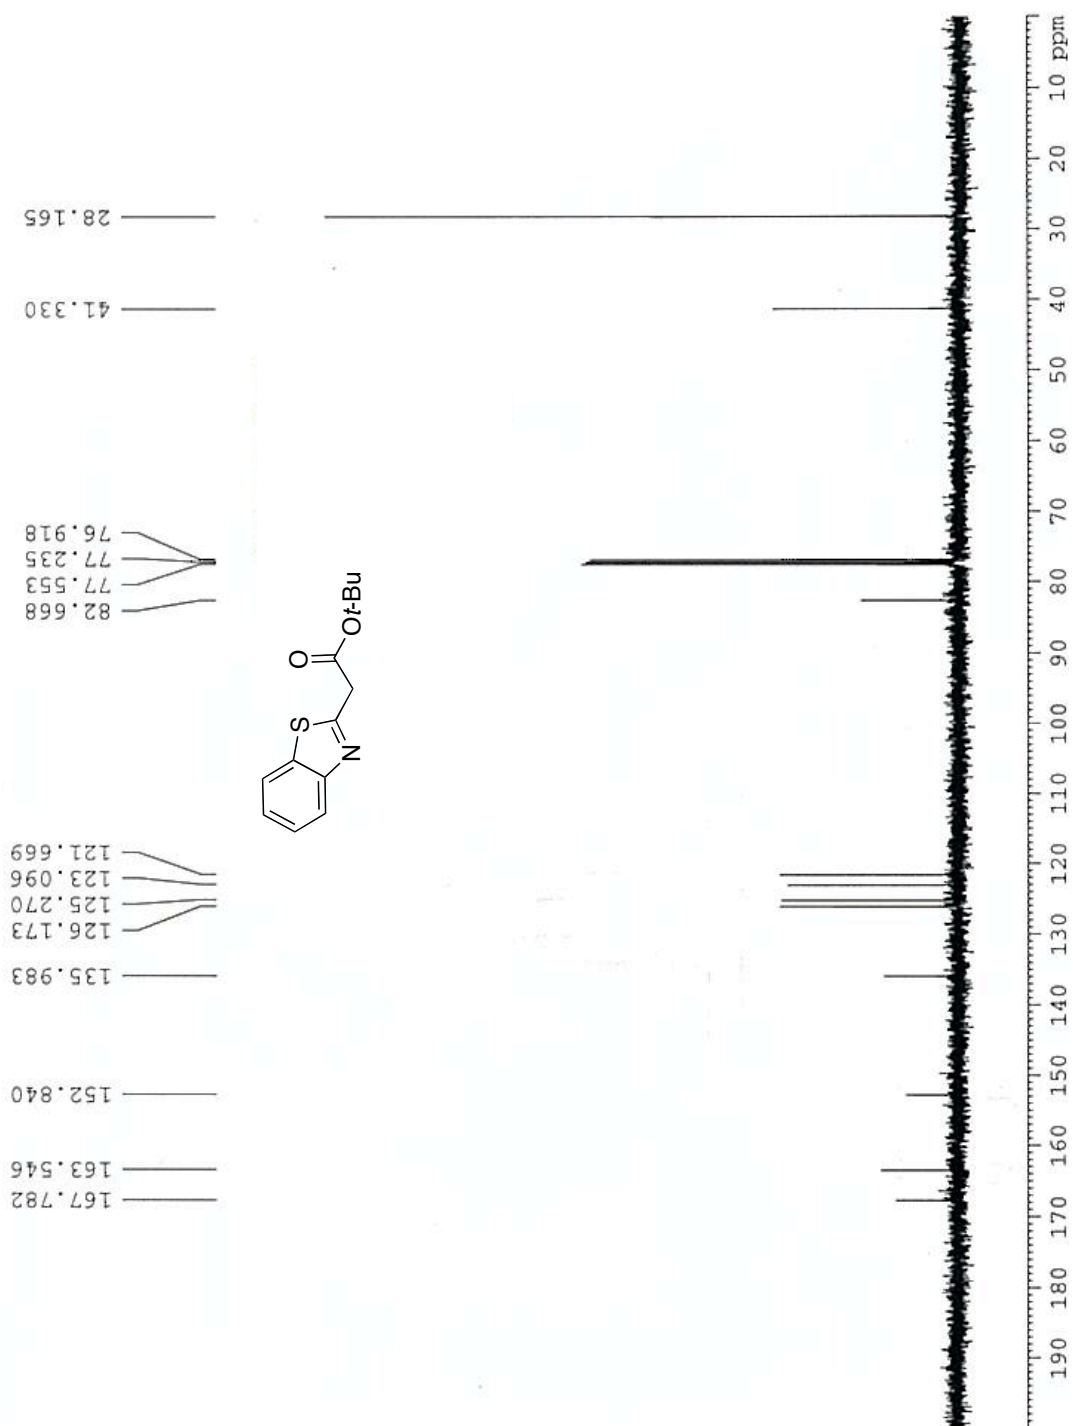

Table 1, Entry 10

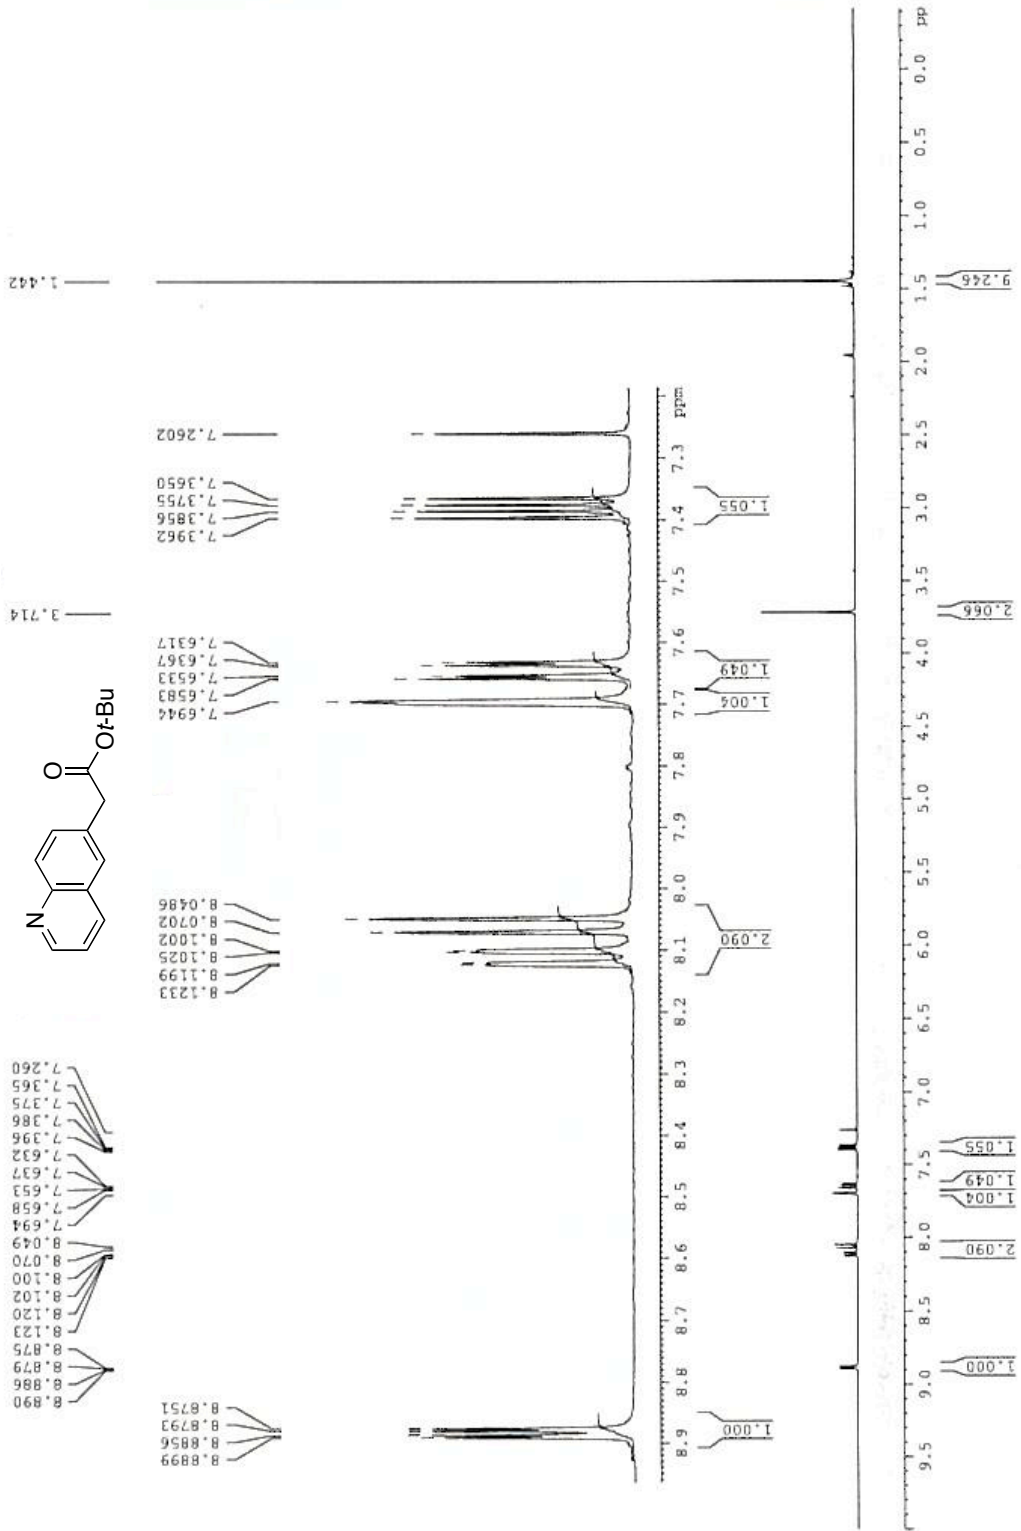

Table 1, Entry 10

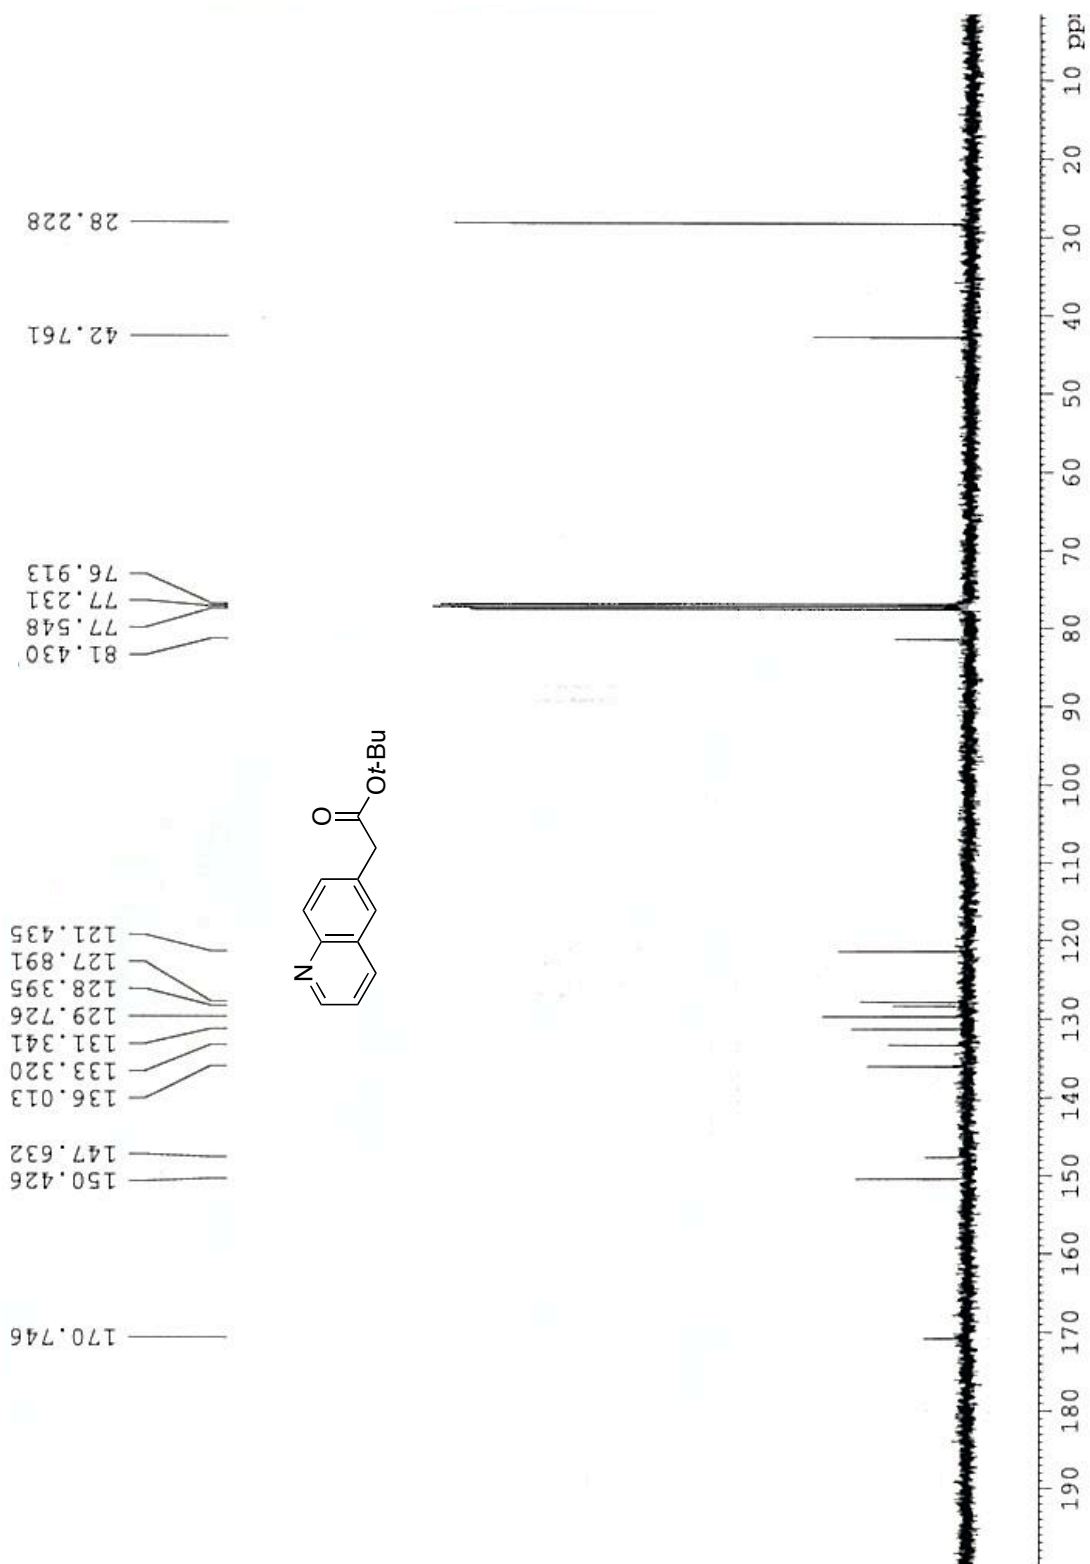

Table 2, Entry 1

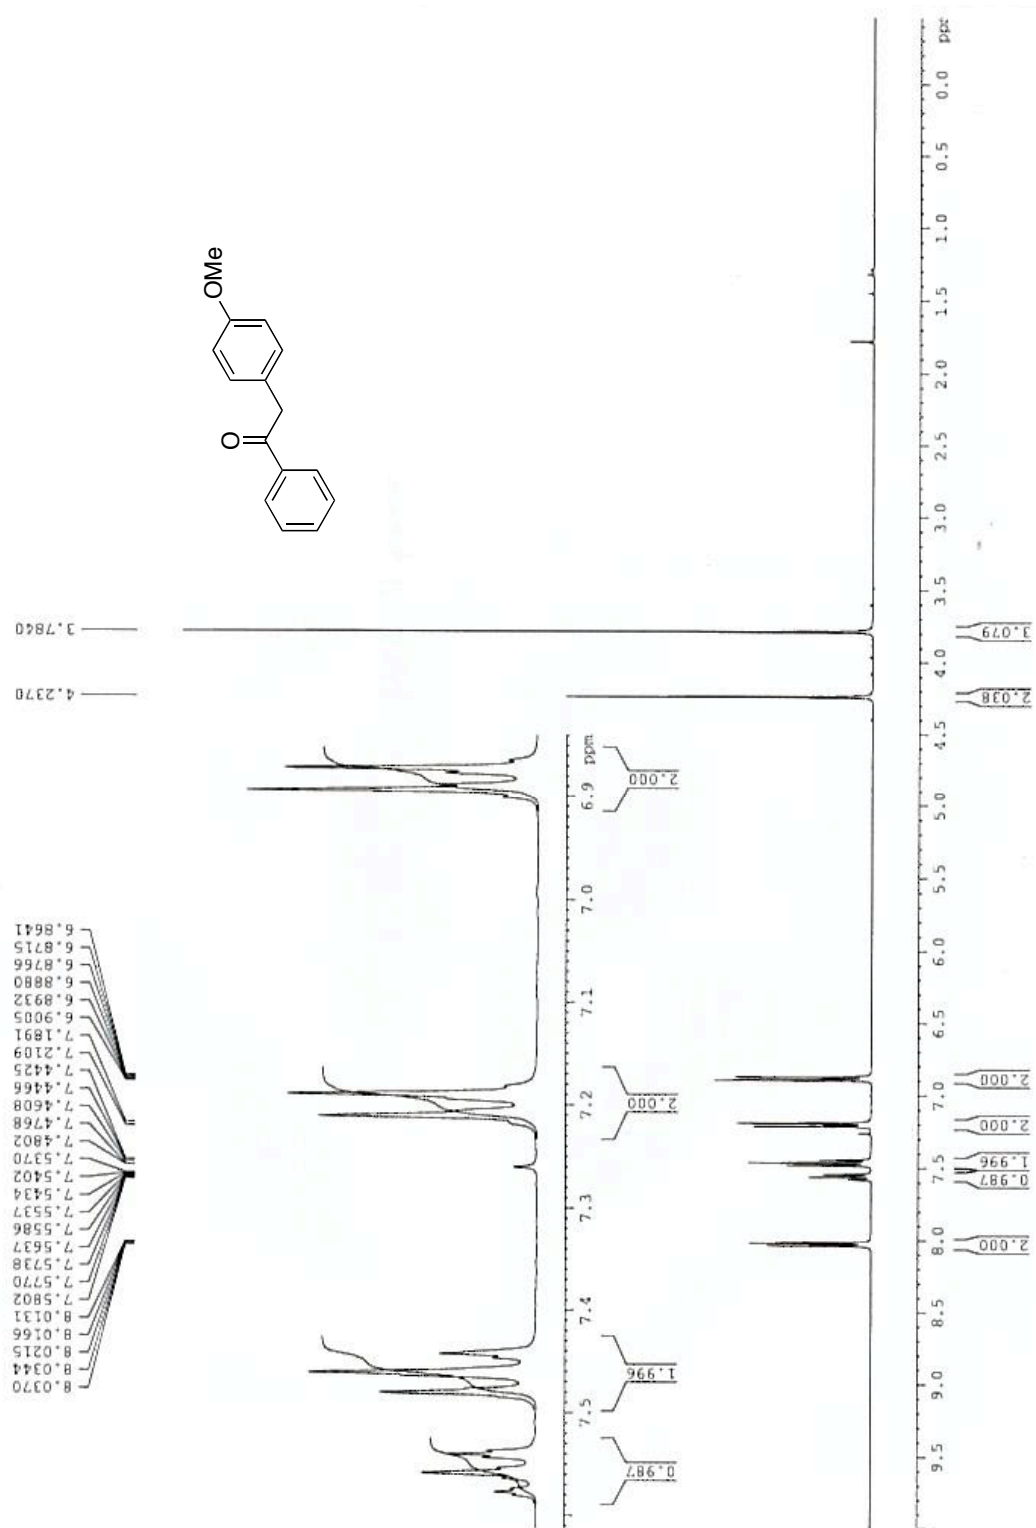

Table 2, Entry 1

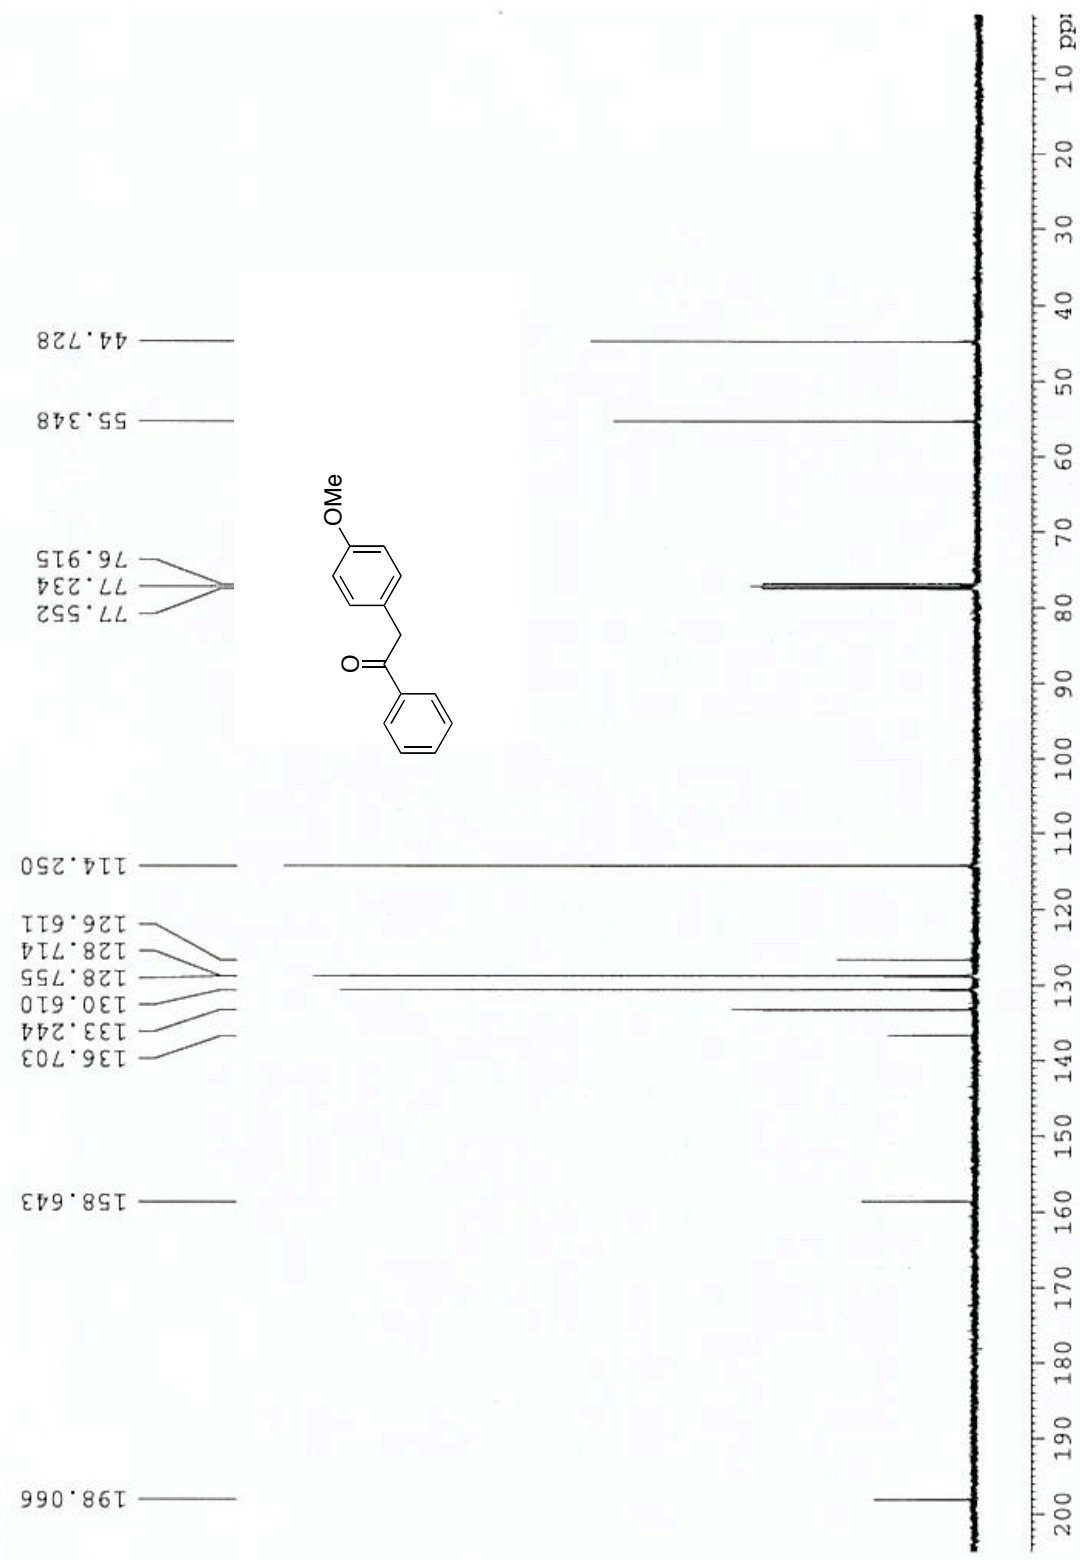

Table 2, Entry 2

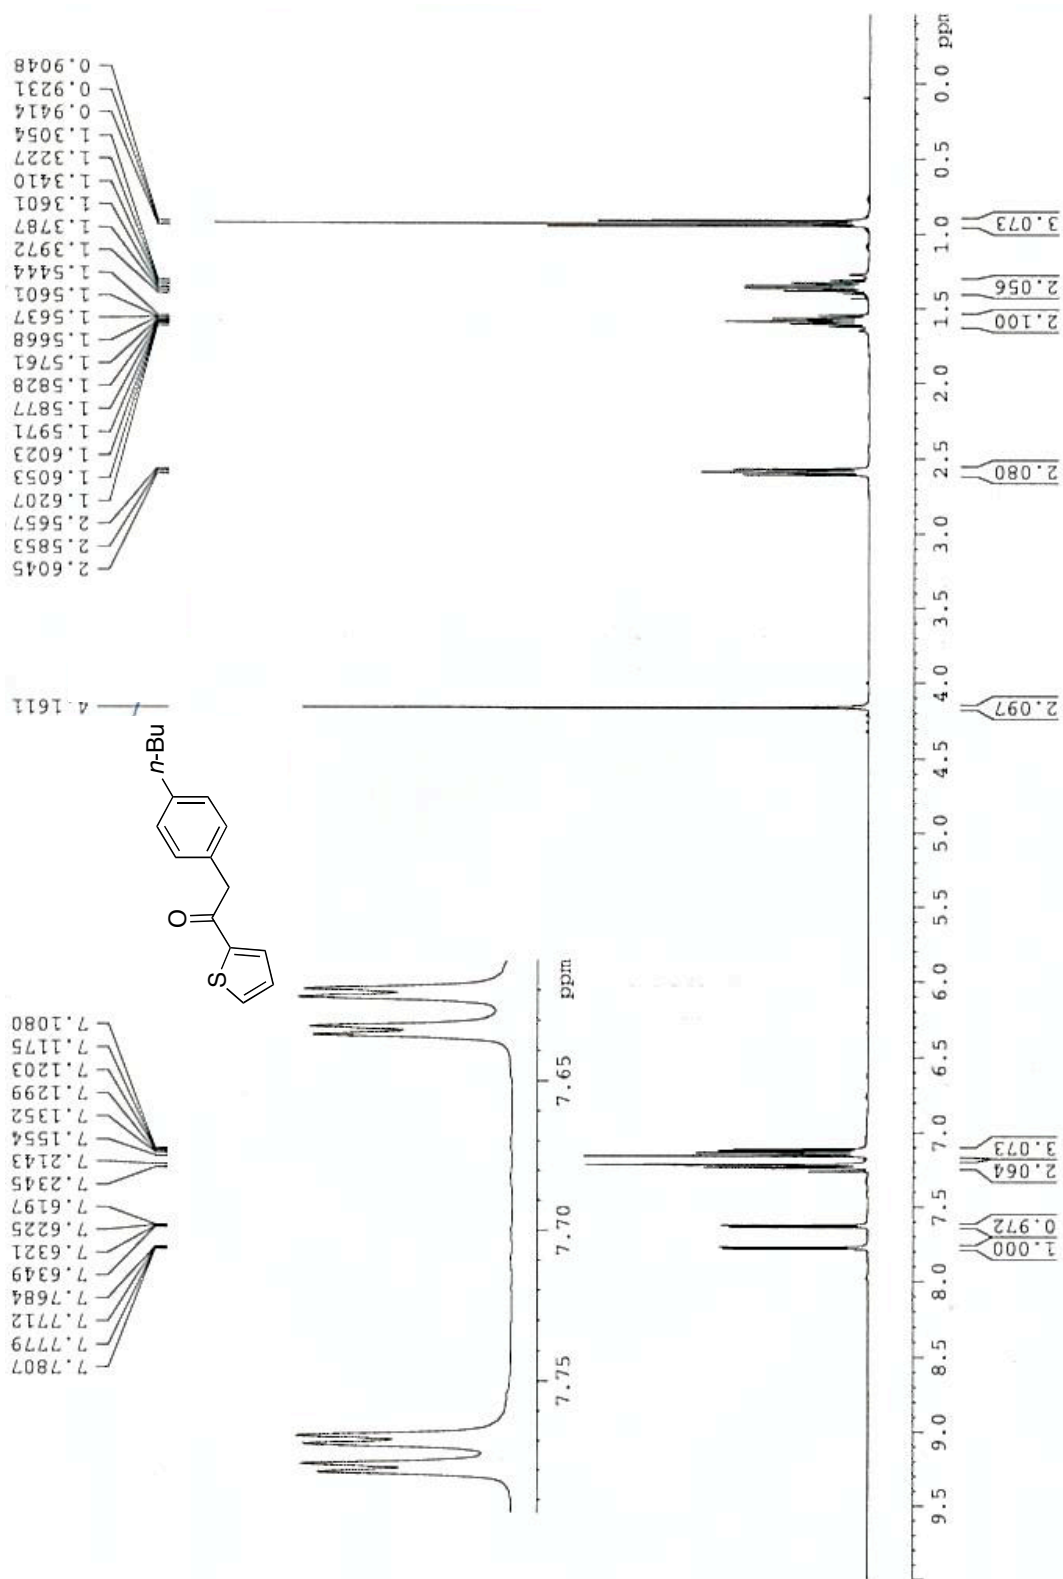

Table 2, Entry 2

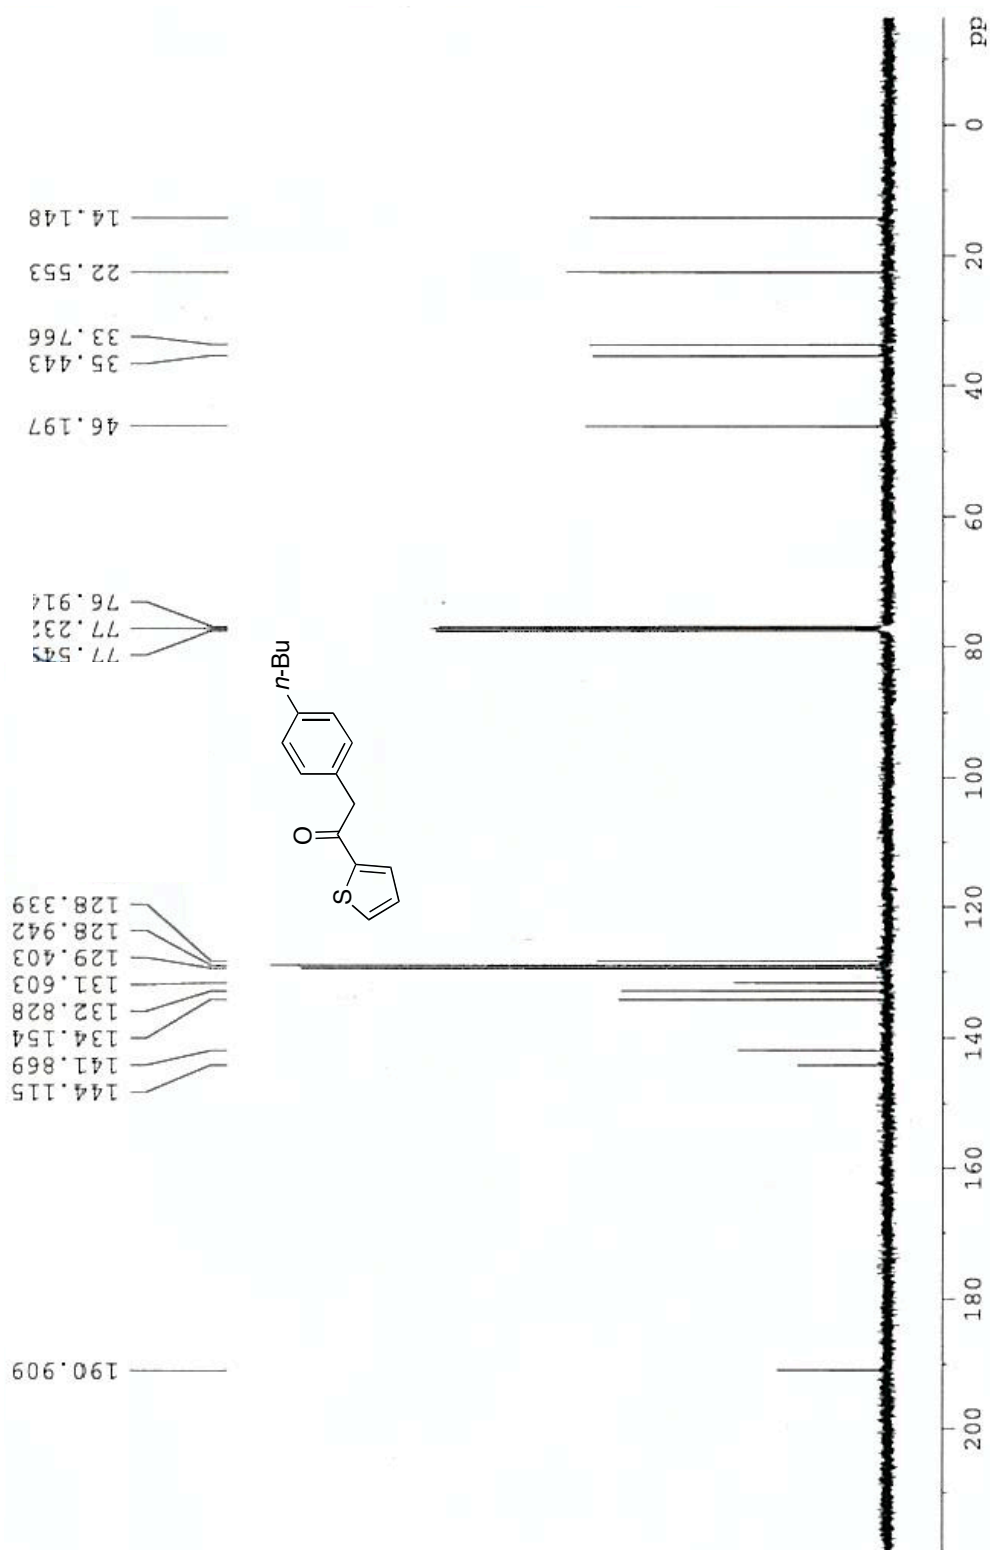



Table 2, Entry 3

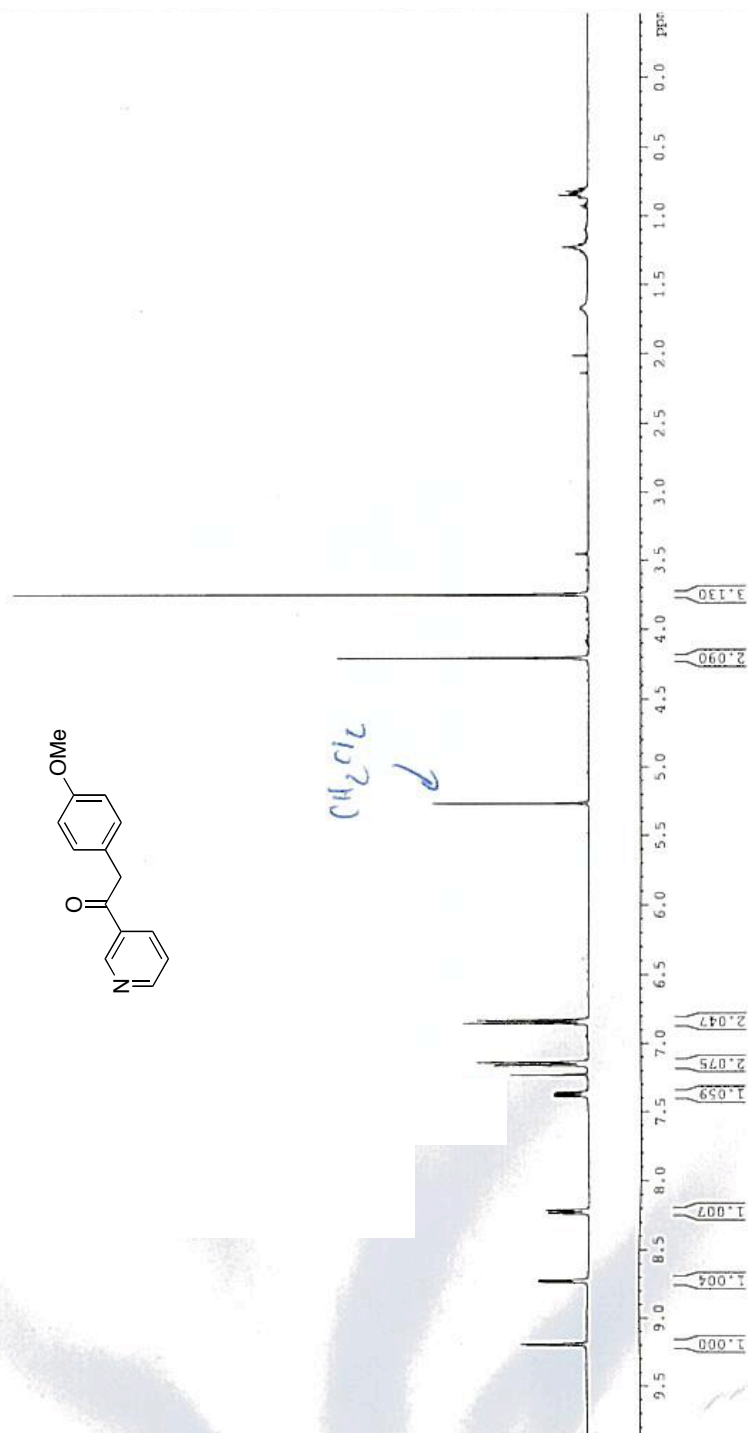

Table 2, Entry 3

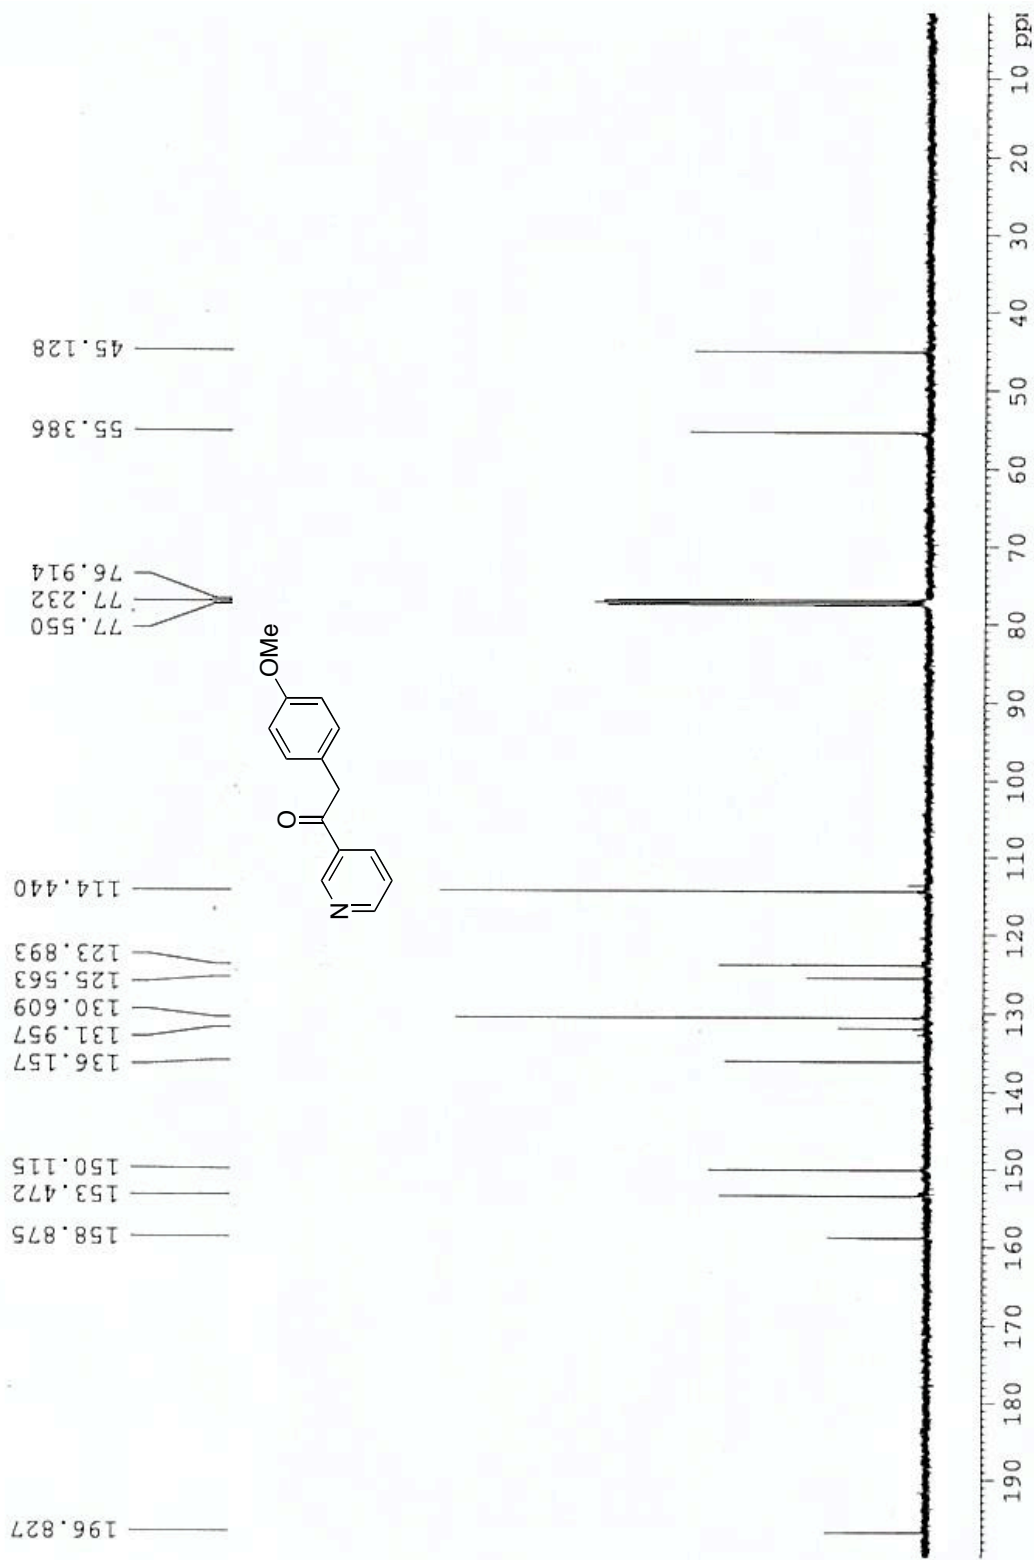

Table 2, Entry 4

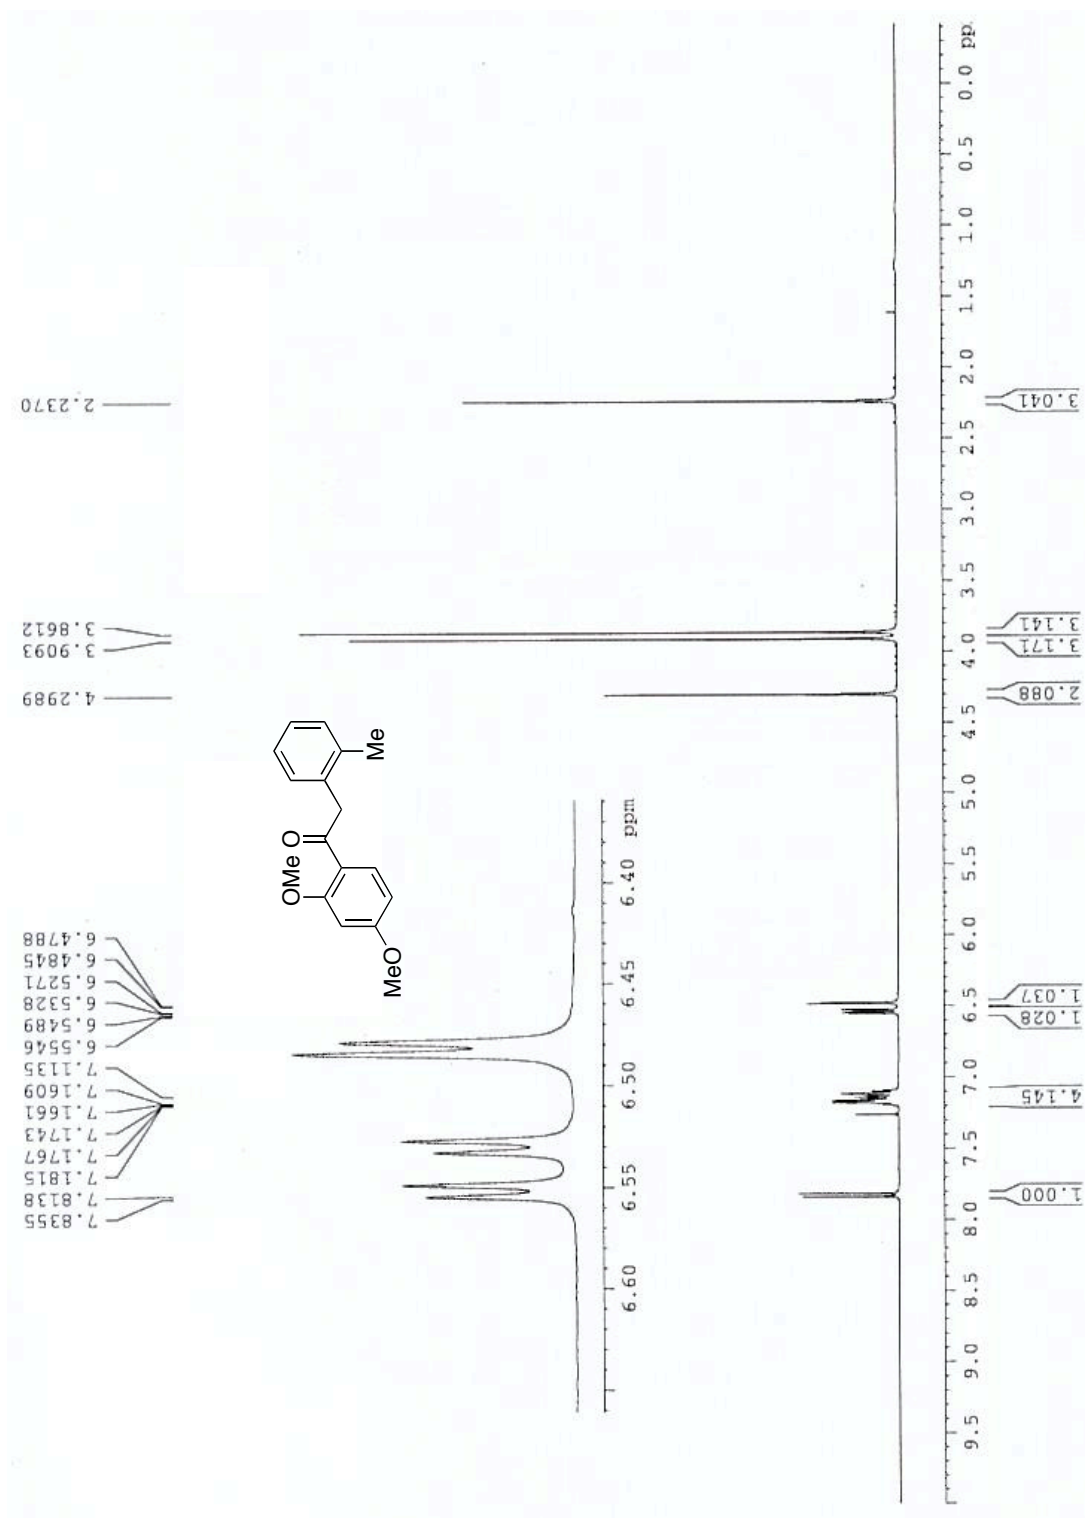

Table 2, Entry 4

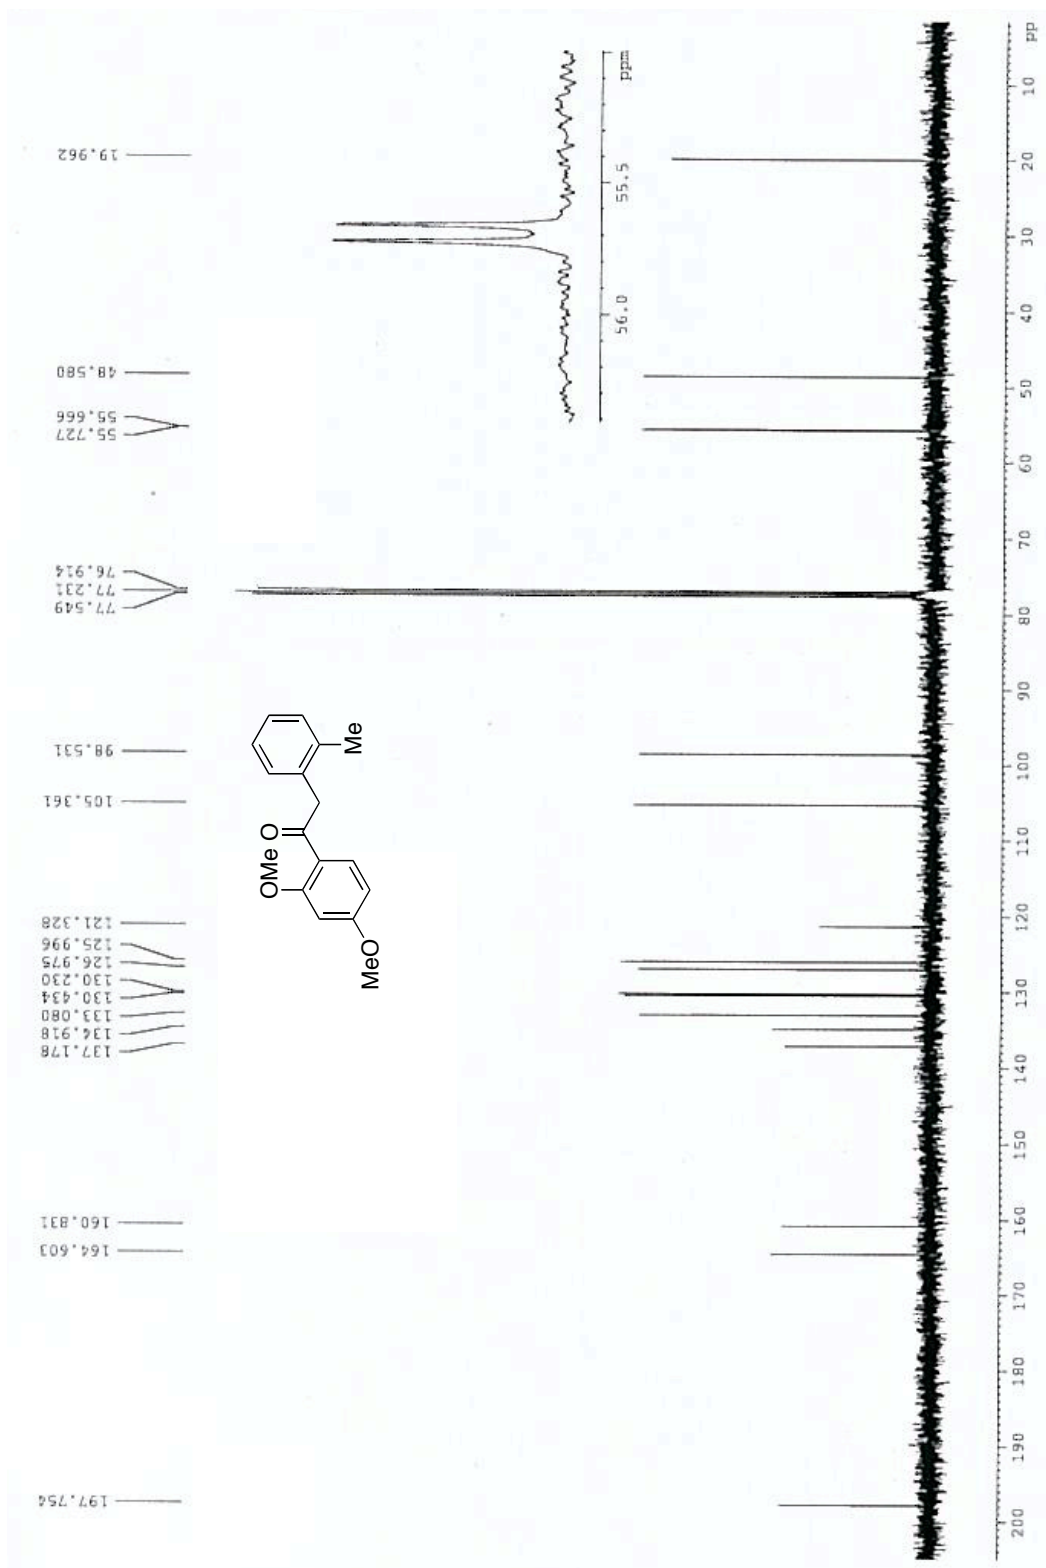

Table 2, Entry 5

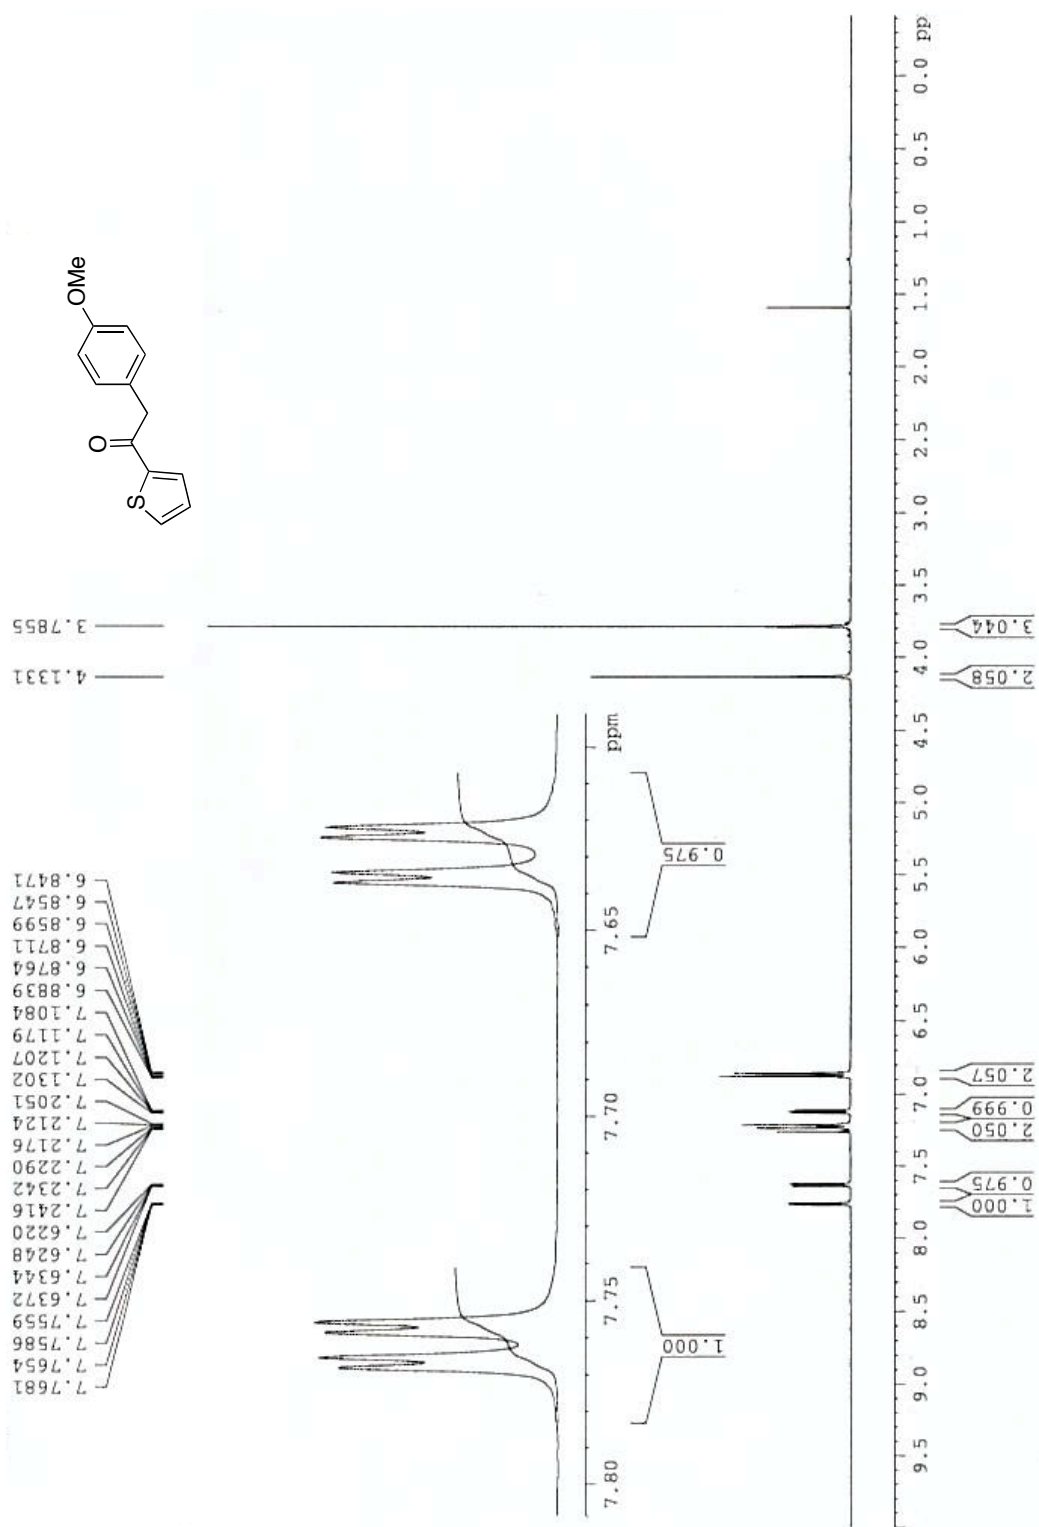

Table 2, Entry 5

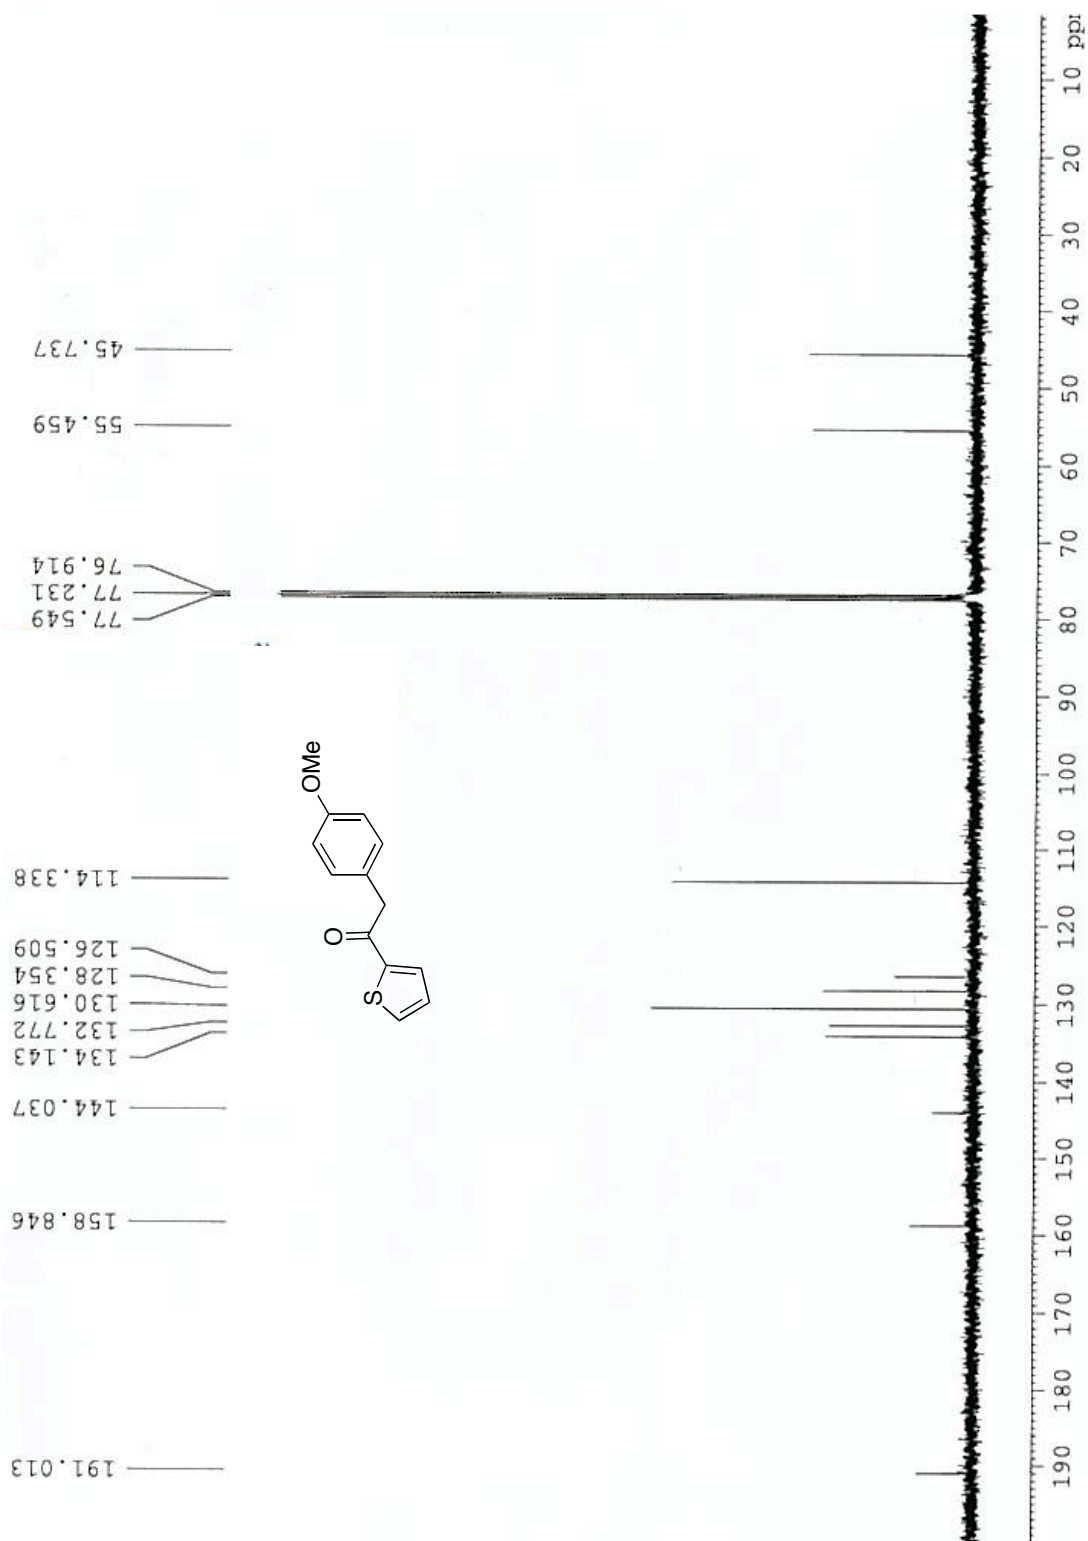

Table 2, Entry 6

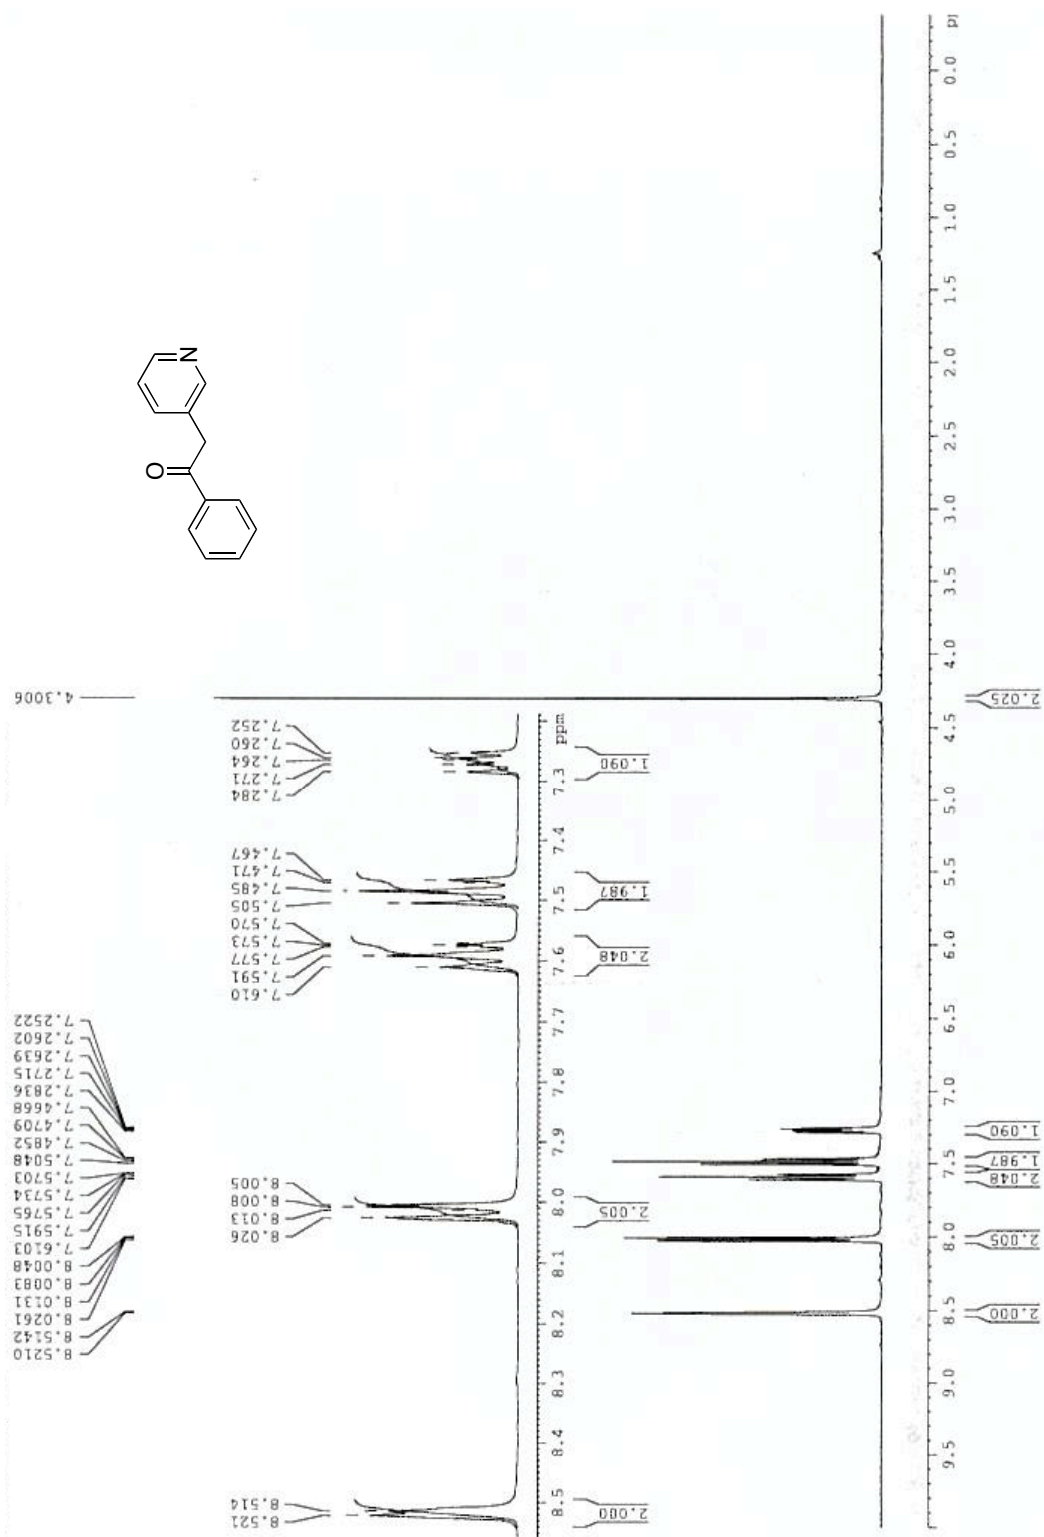

Table 2, Entry 6

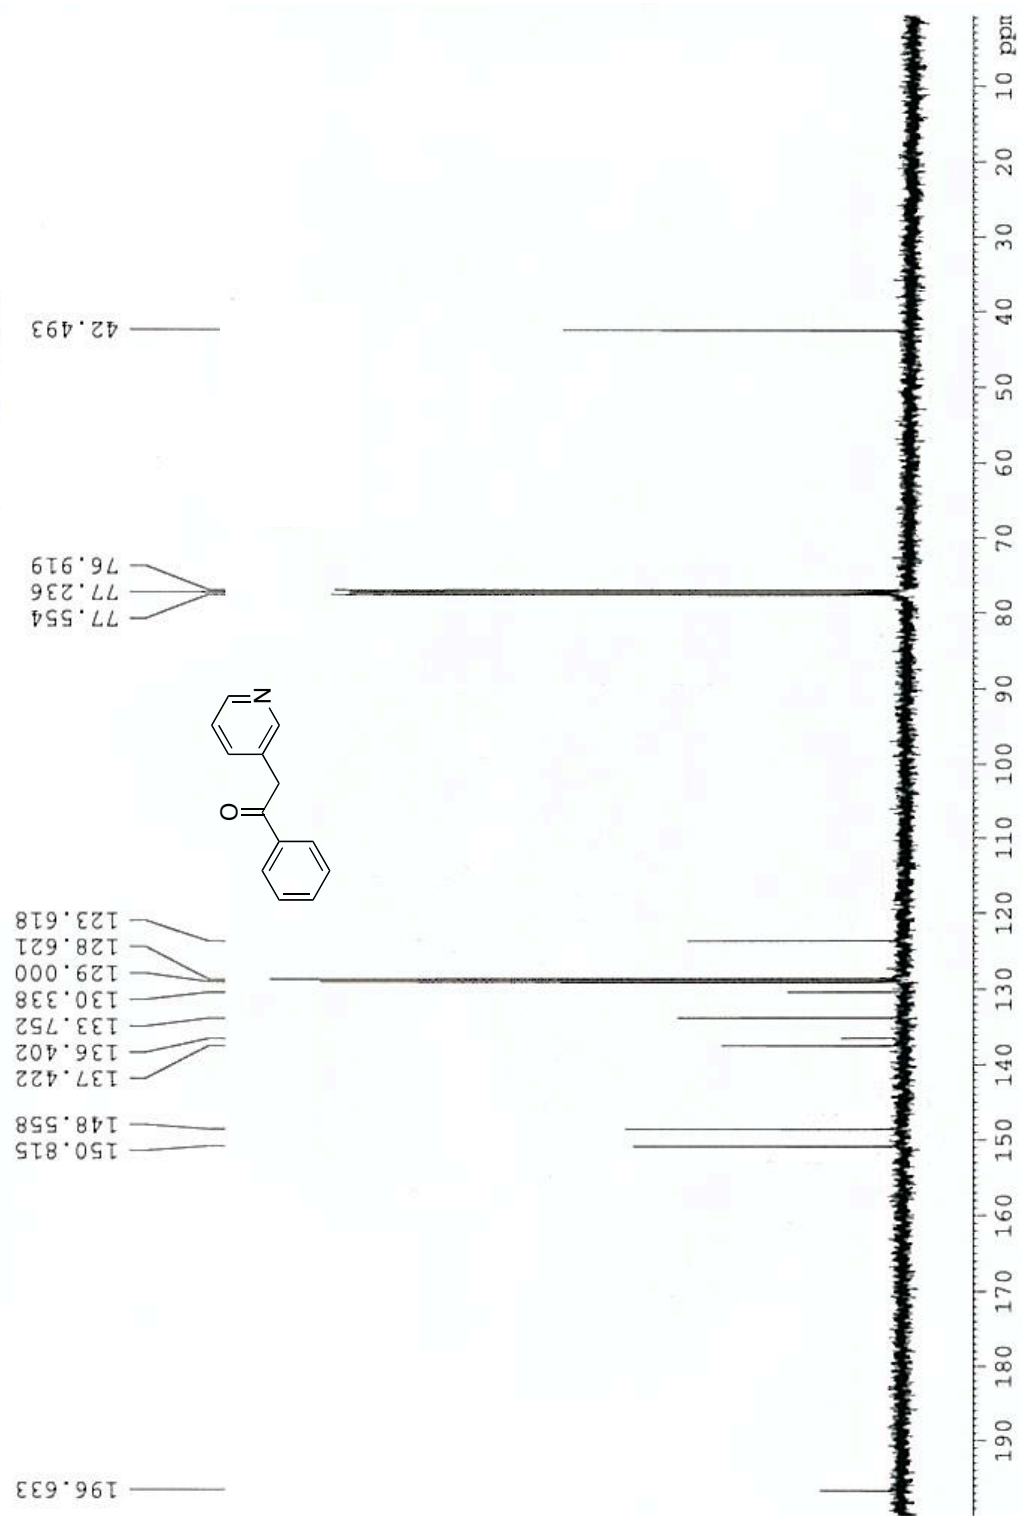



Table 2, Entry 7

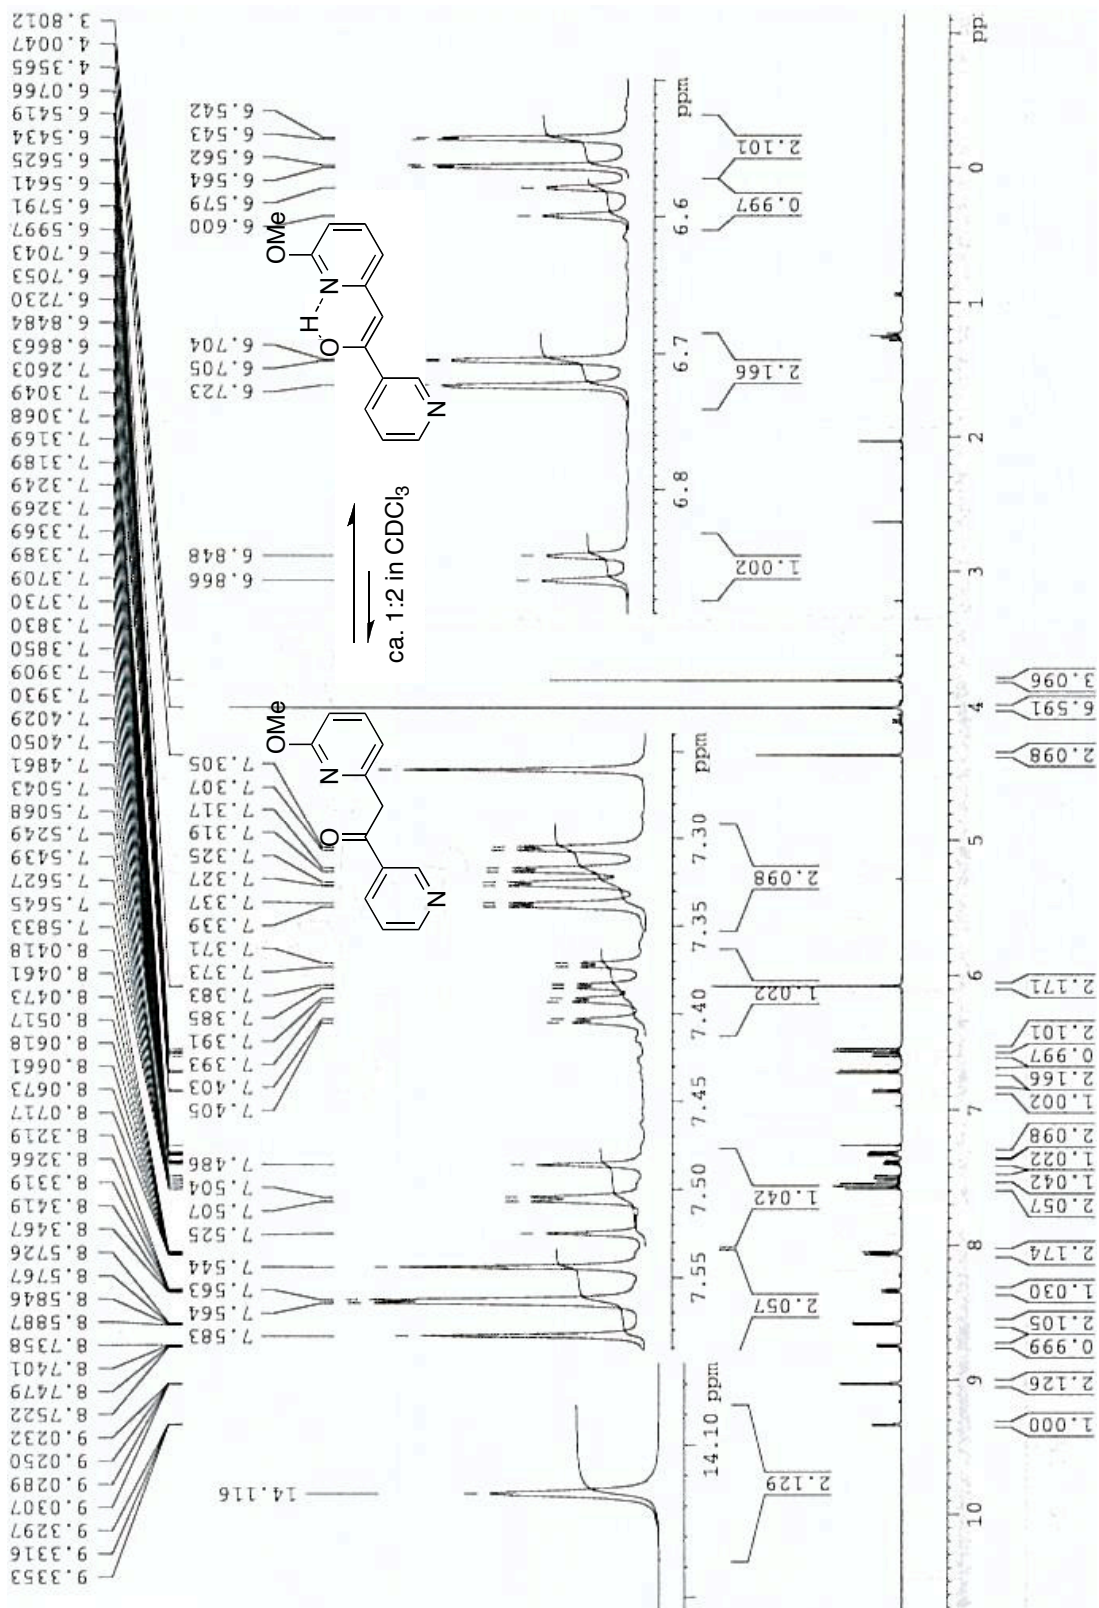

Table 2, Entry 7

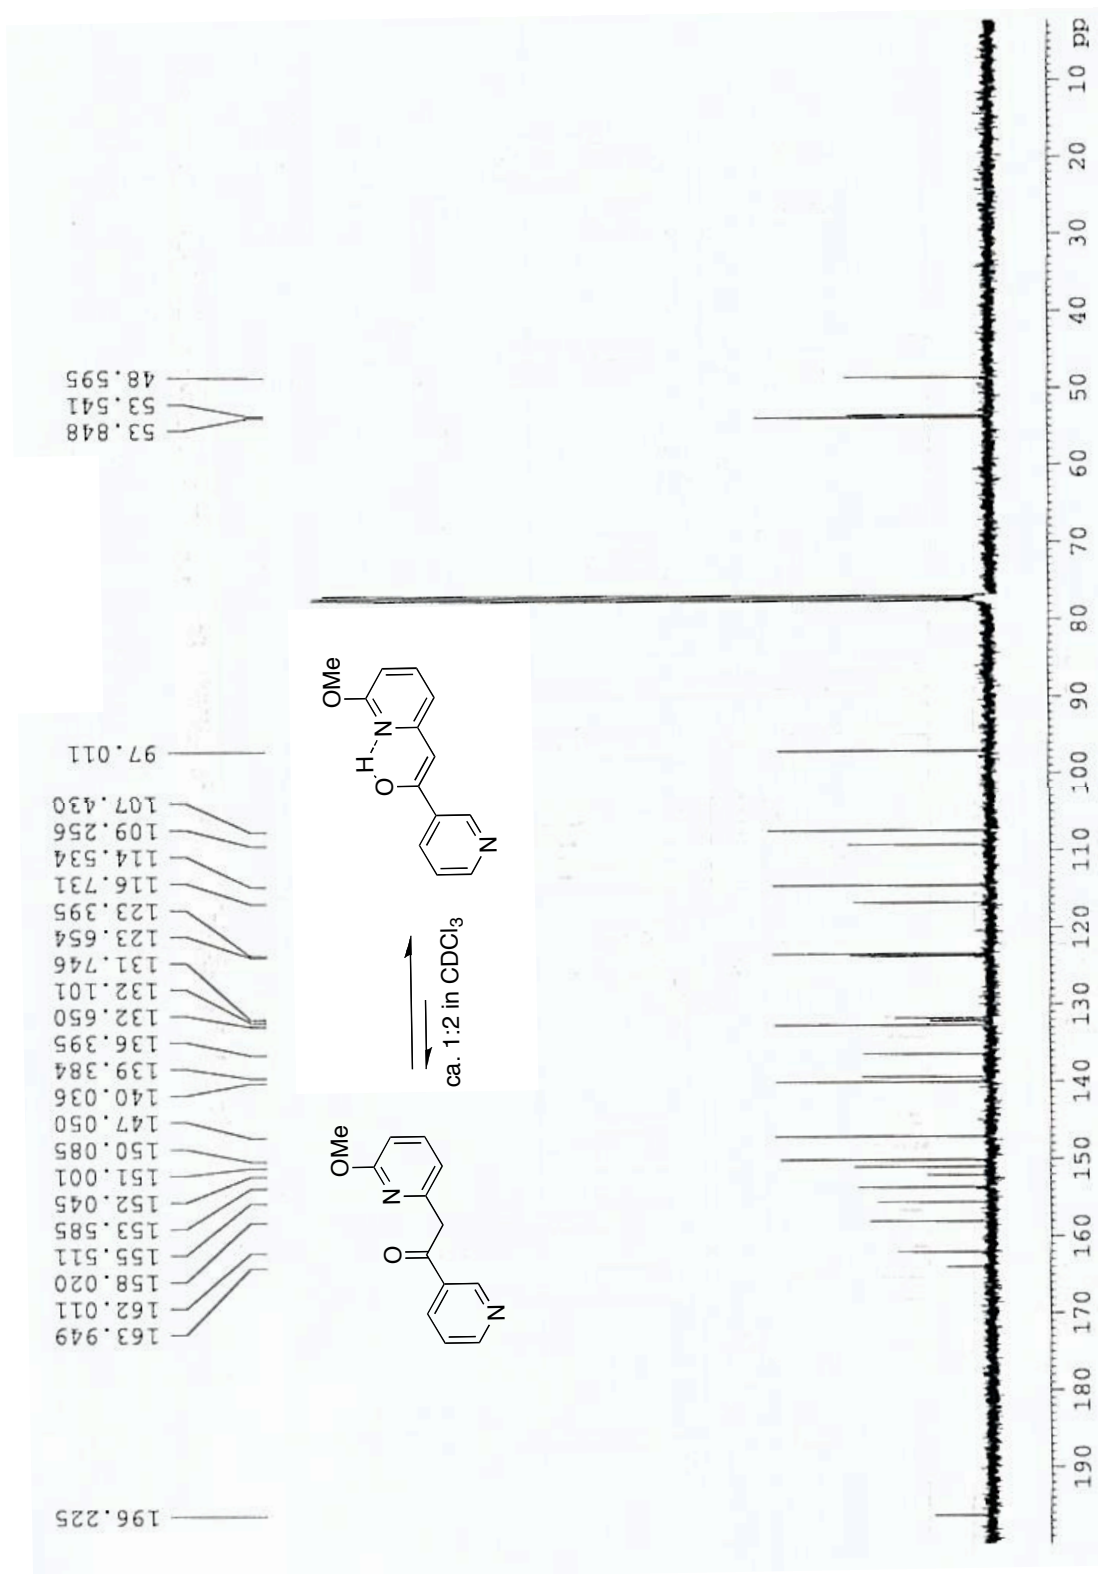

Table 2, Entry 8

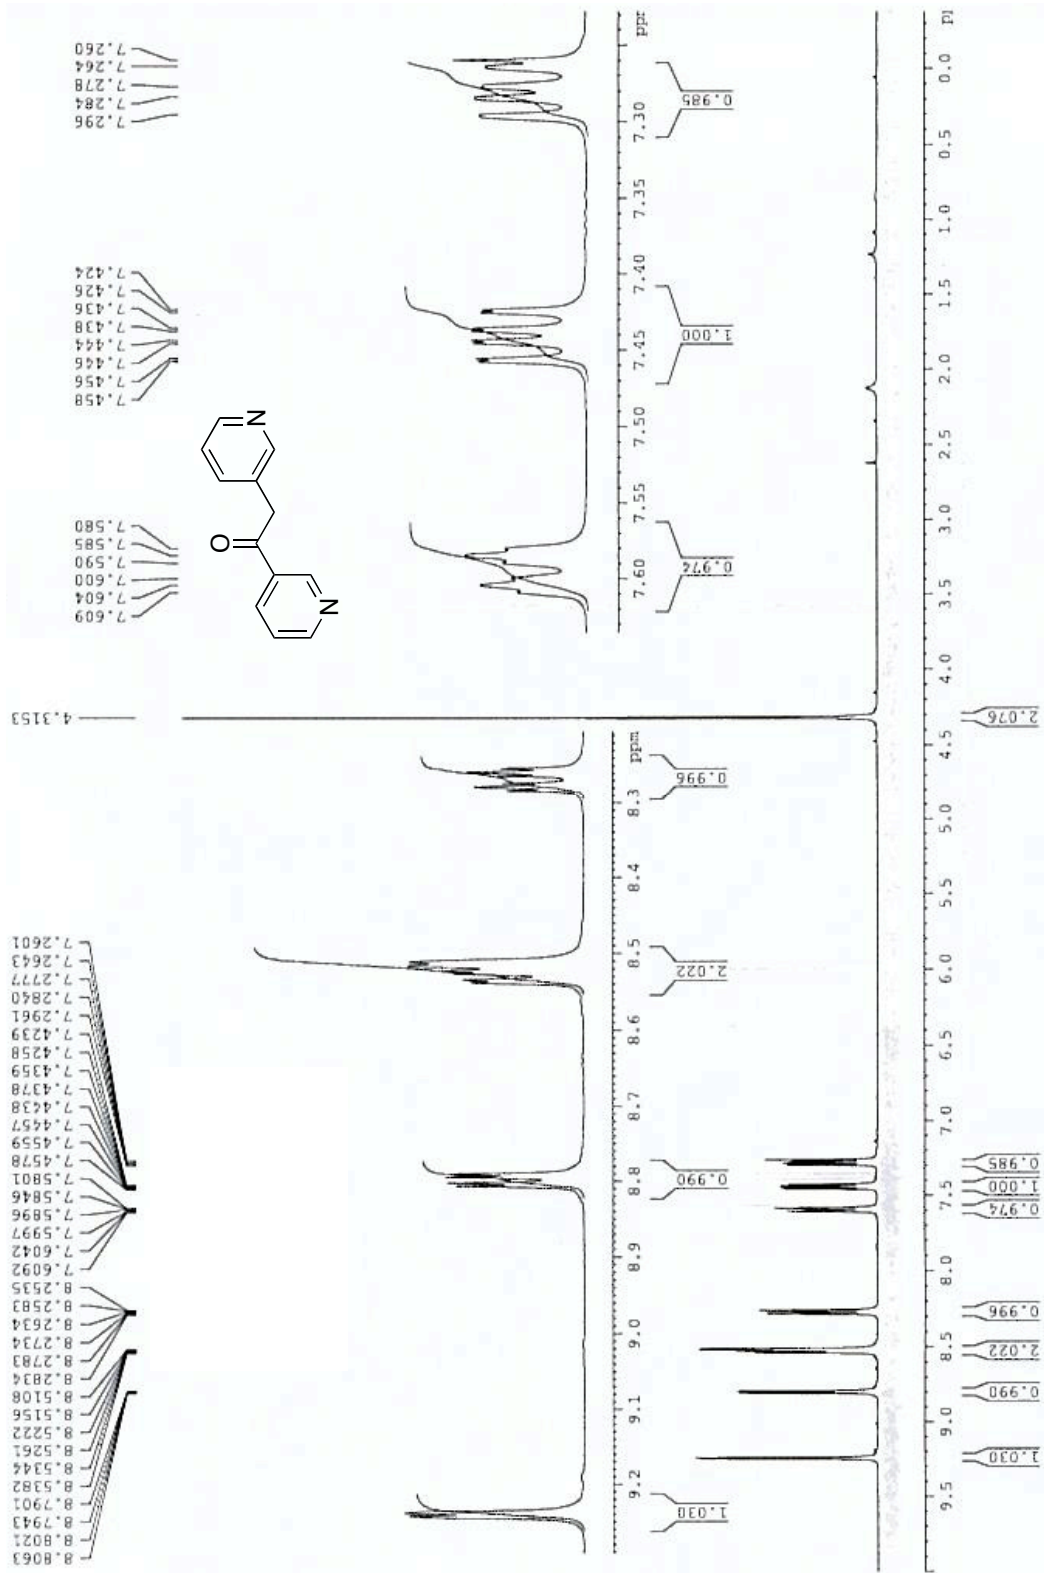

Table 2, Entry 8

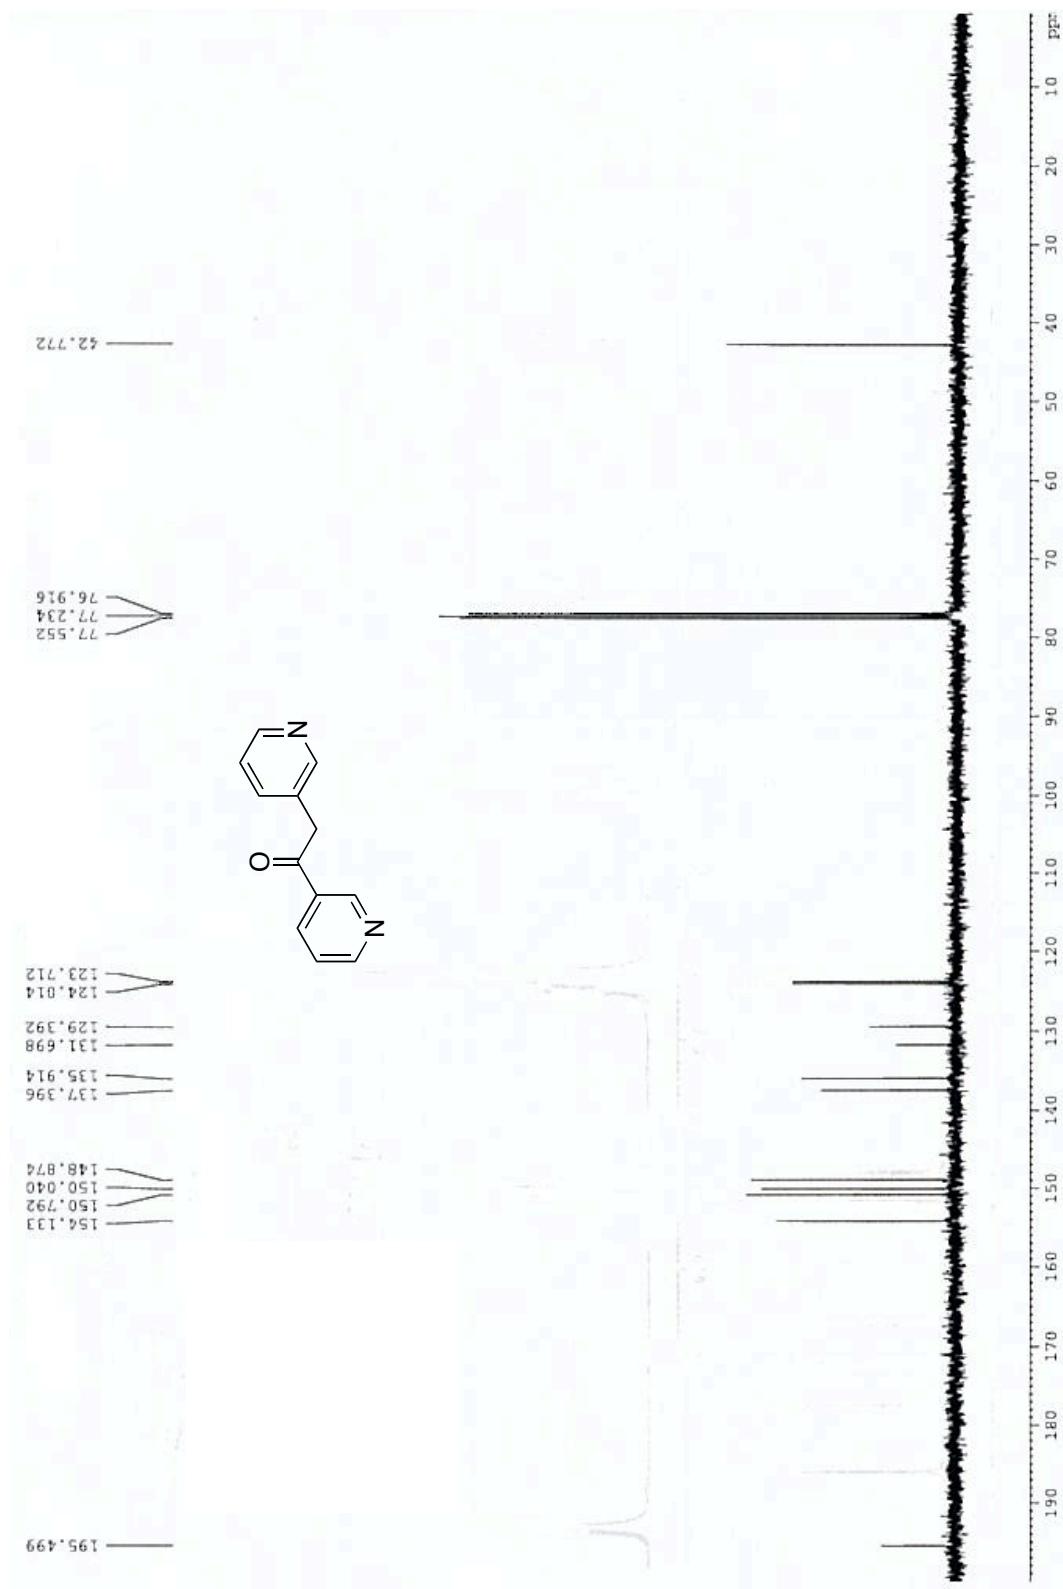

Table 2, Entry 9

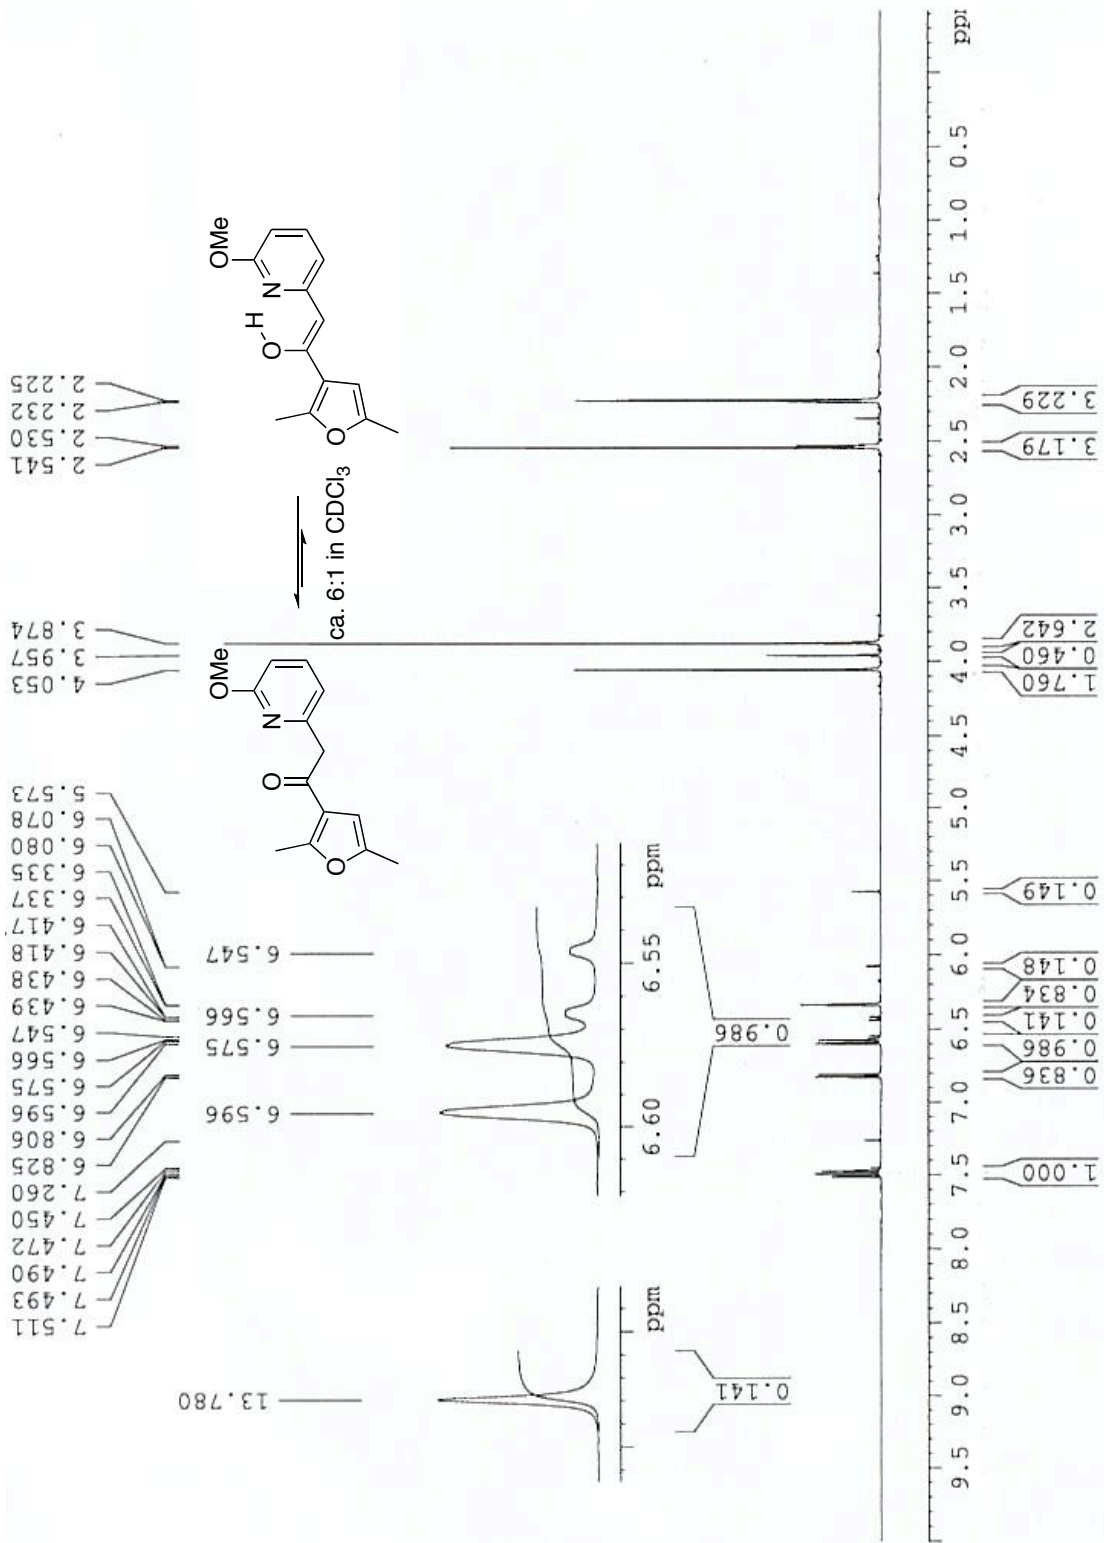



Table 2, Entry 9

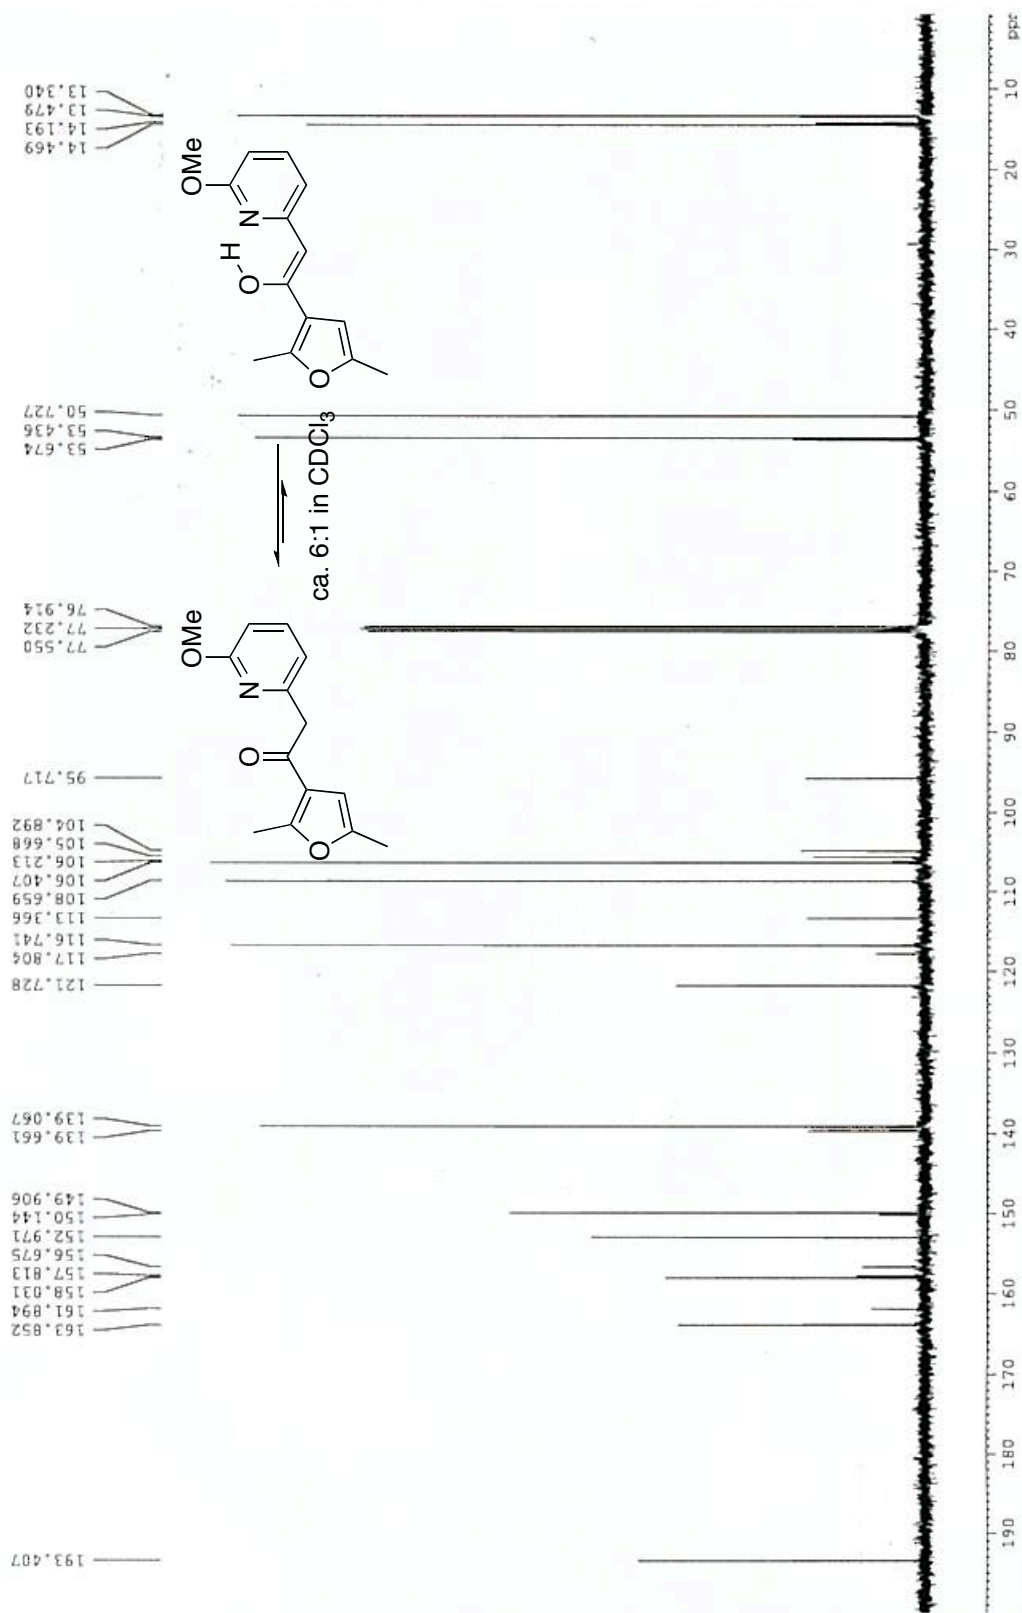

Table 2, Entry 10

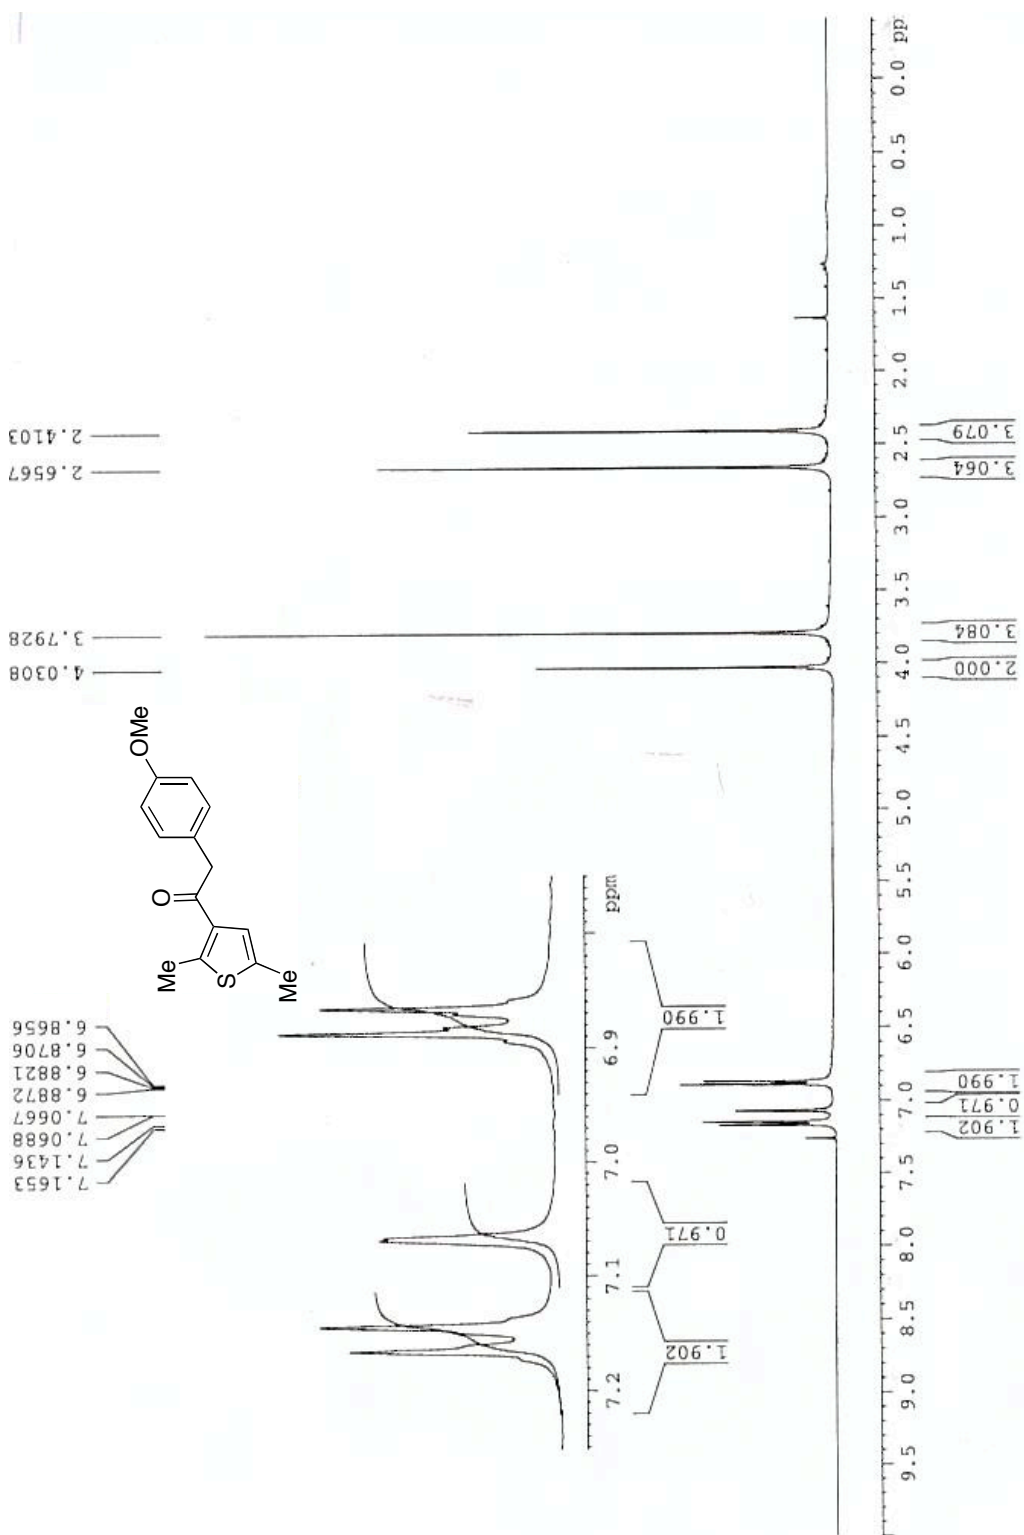

Table 2, Entry 10

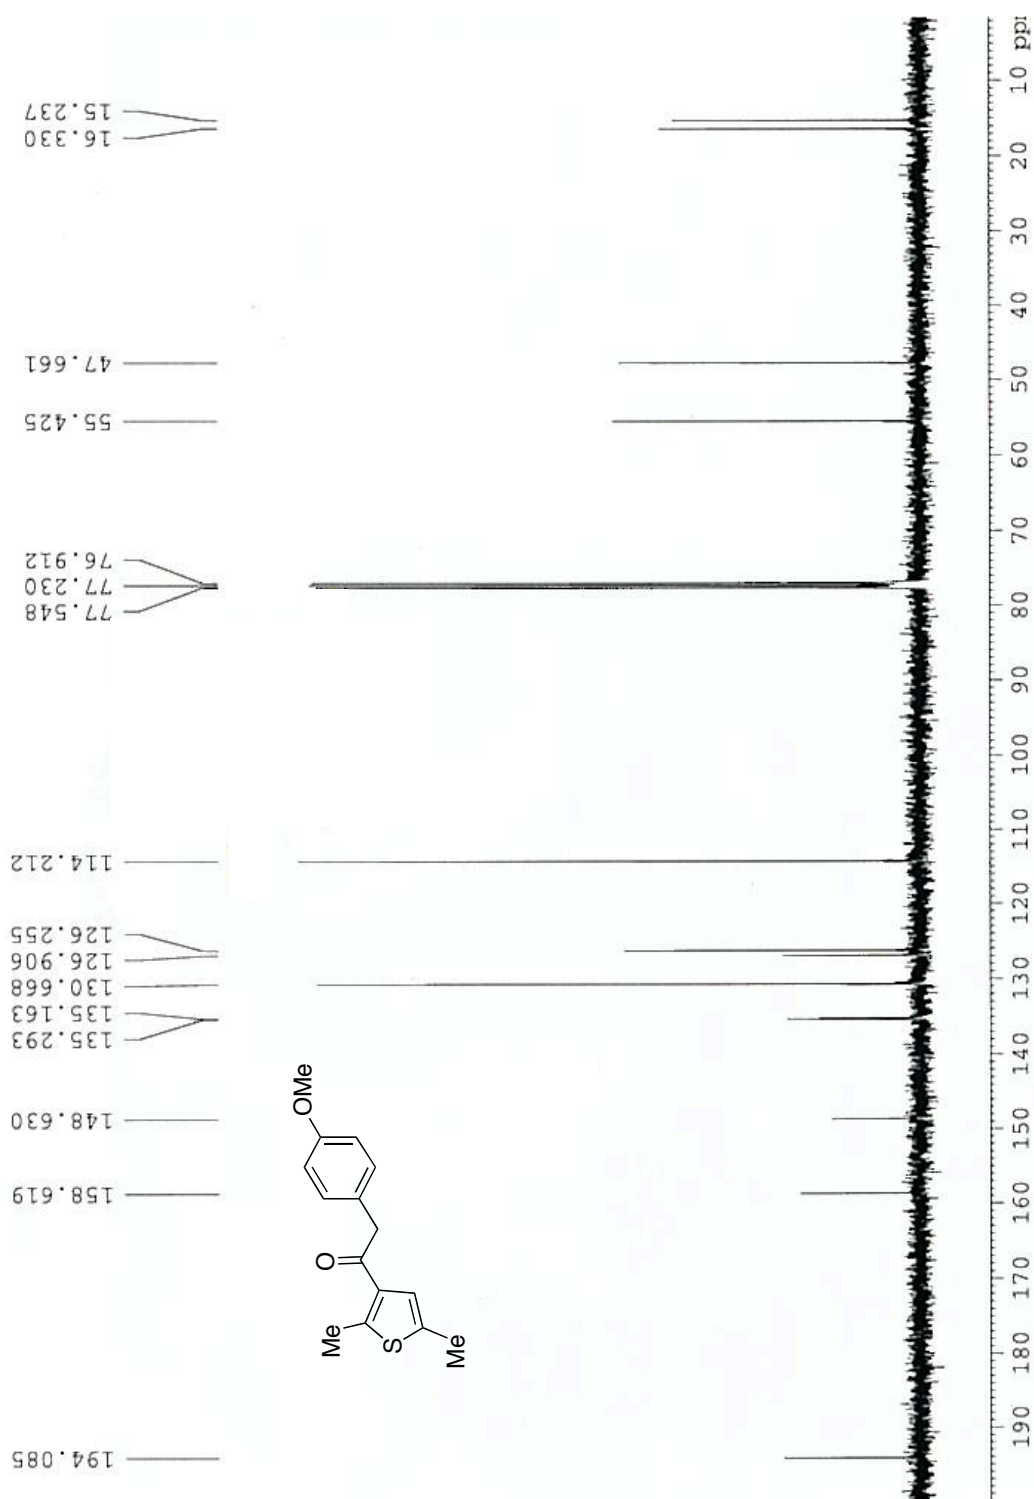



Table 2, Entry 11

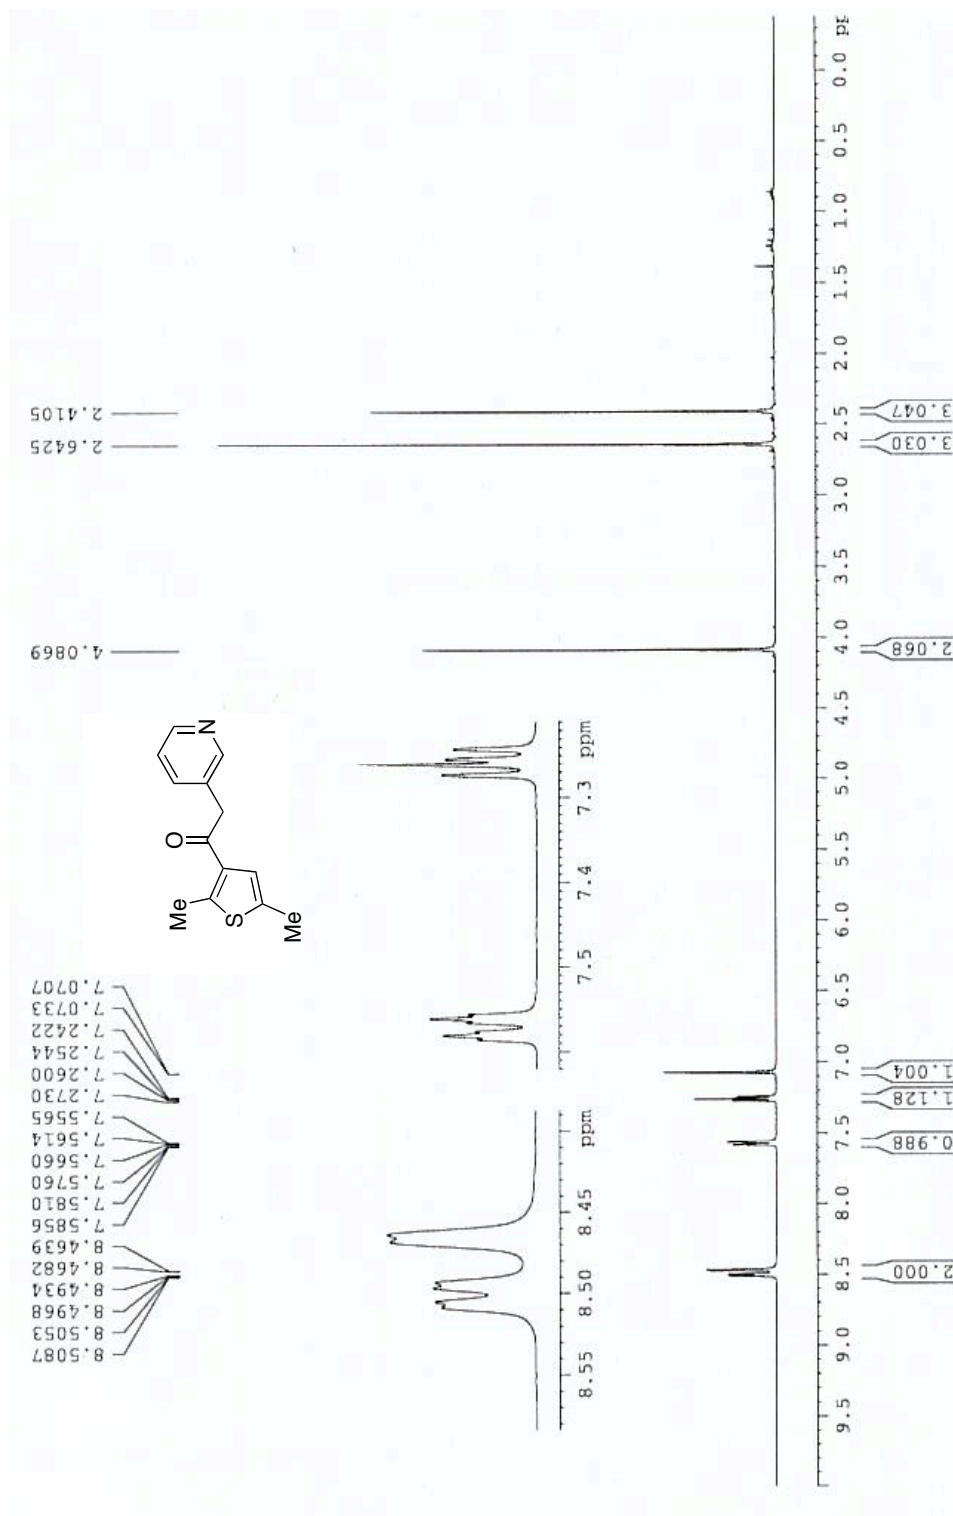

Table 2, Entry 11

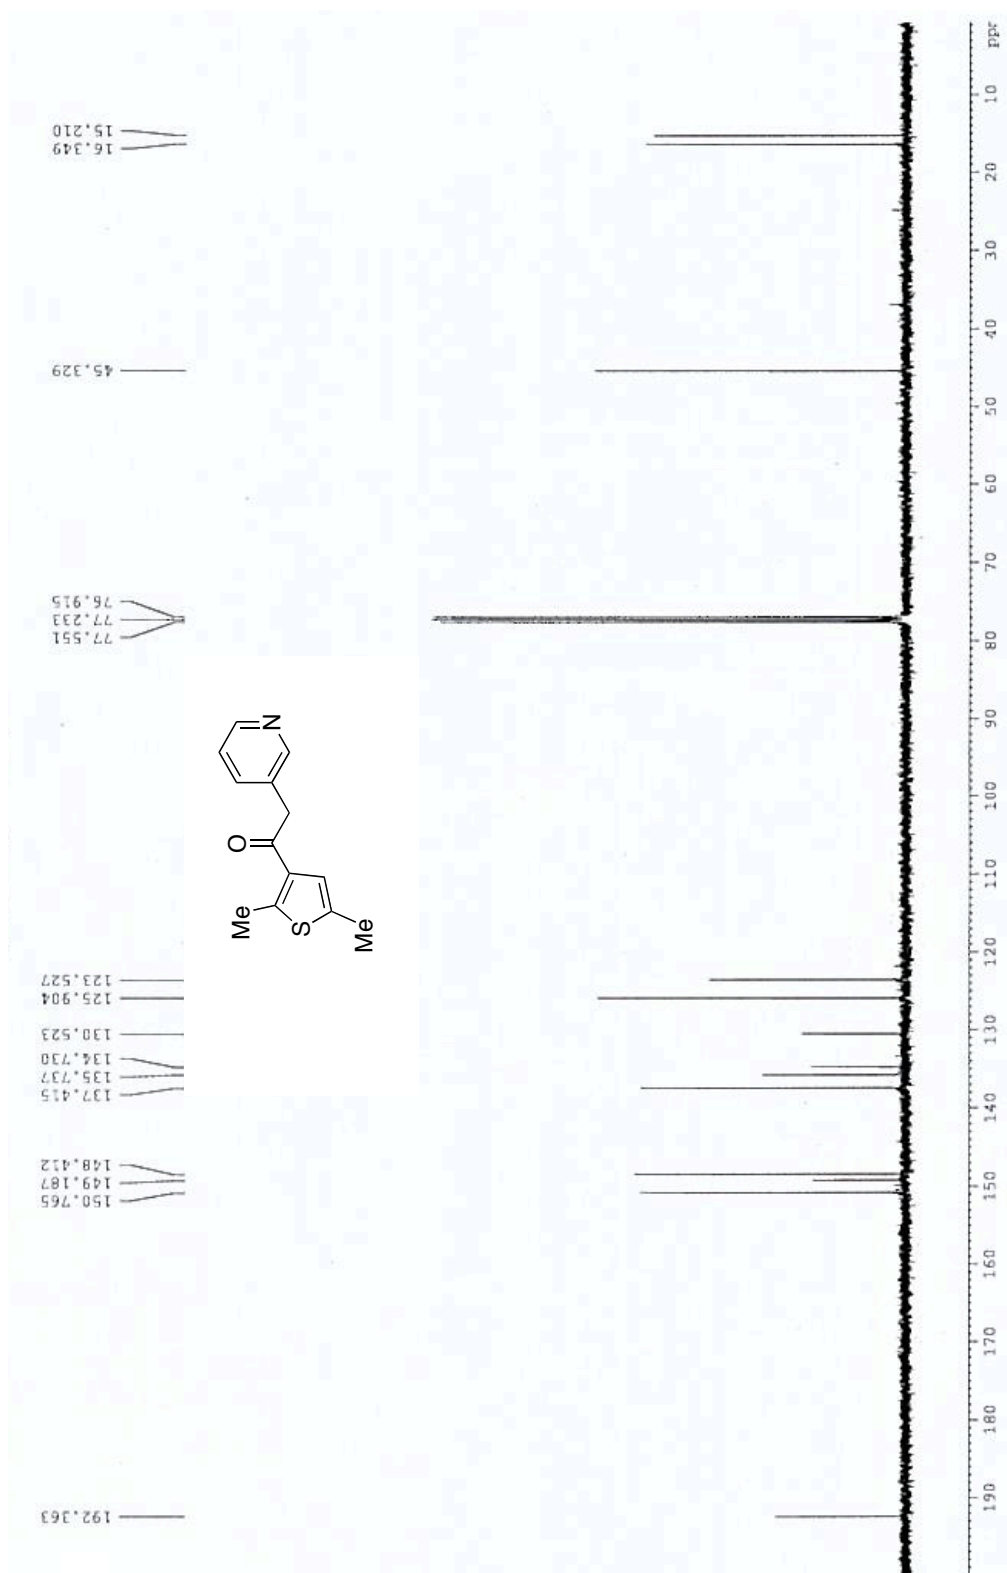

Table 2, Entry 12

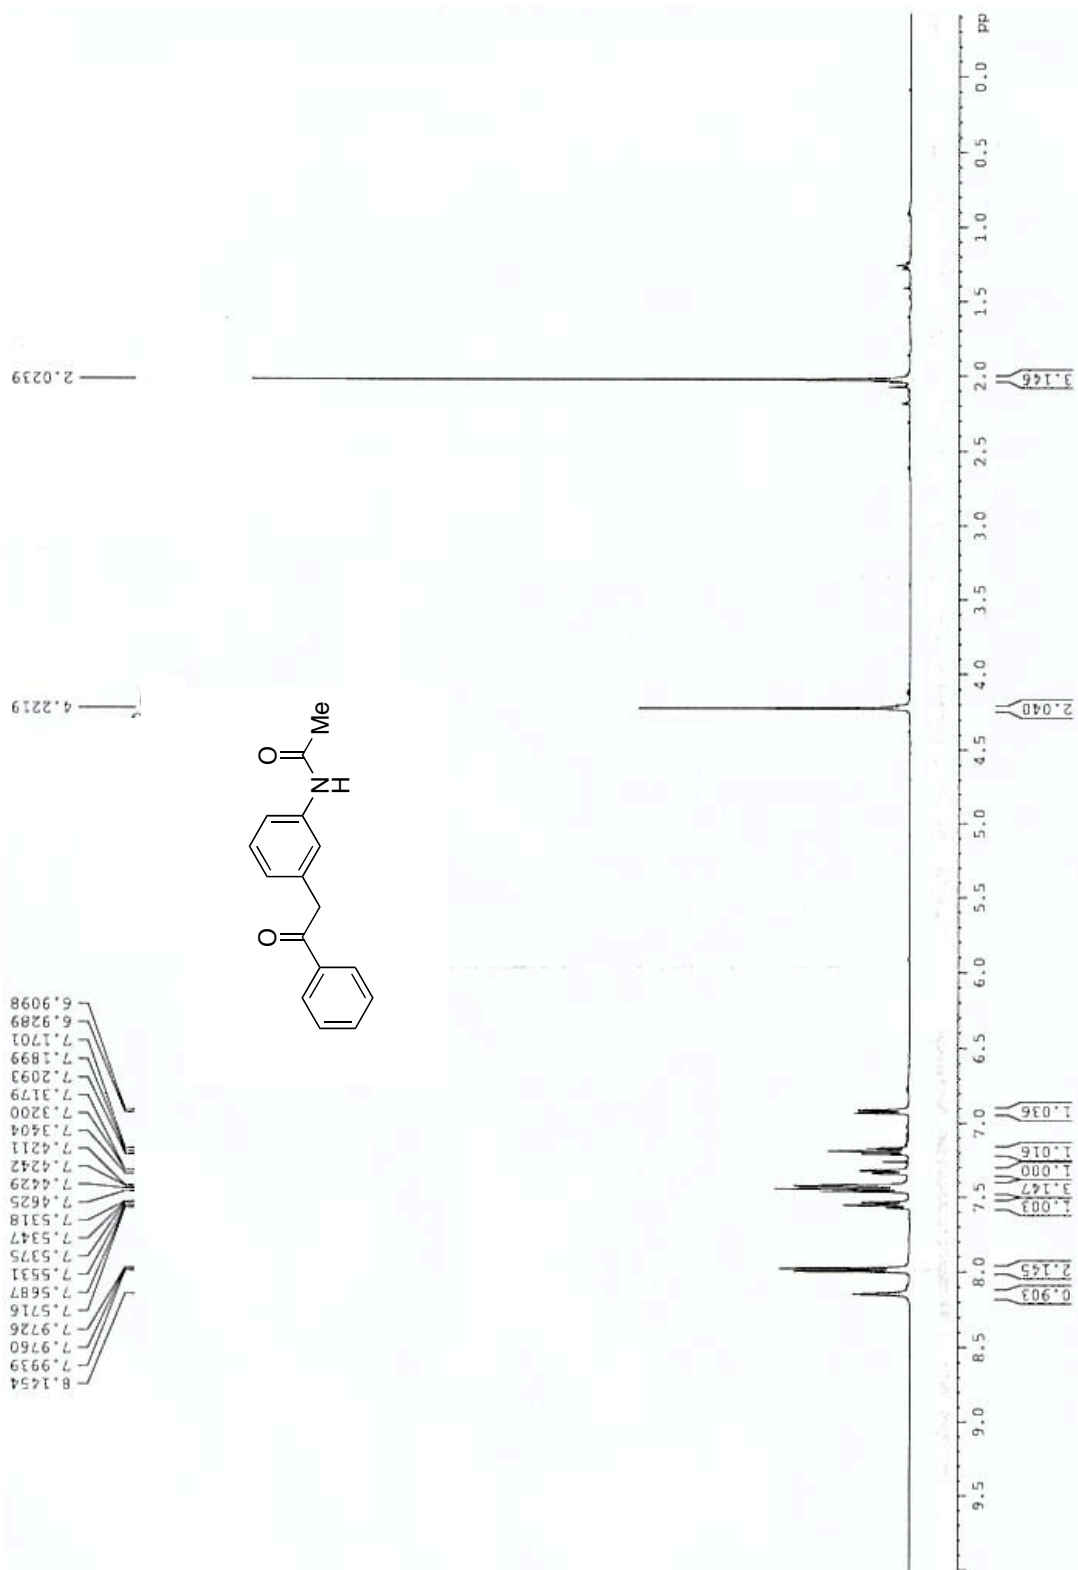

Table 2, Entry 12

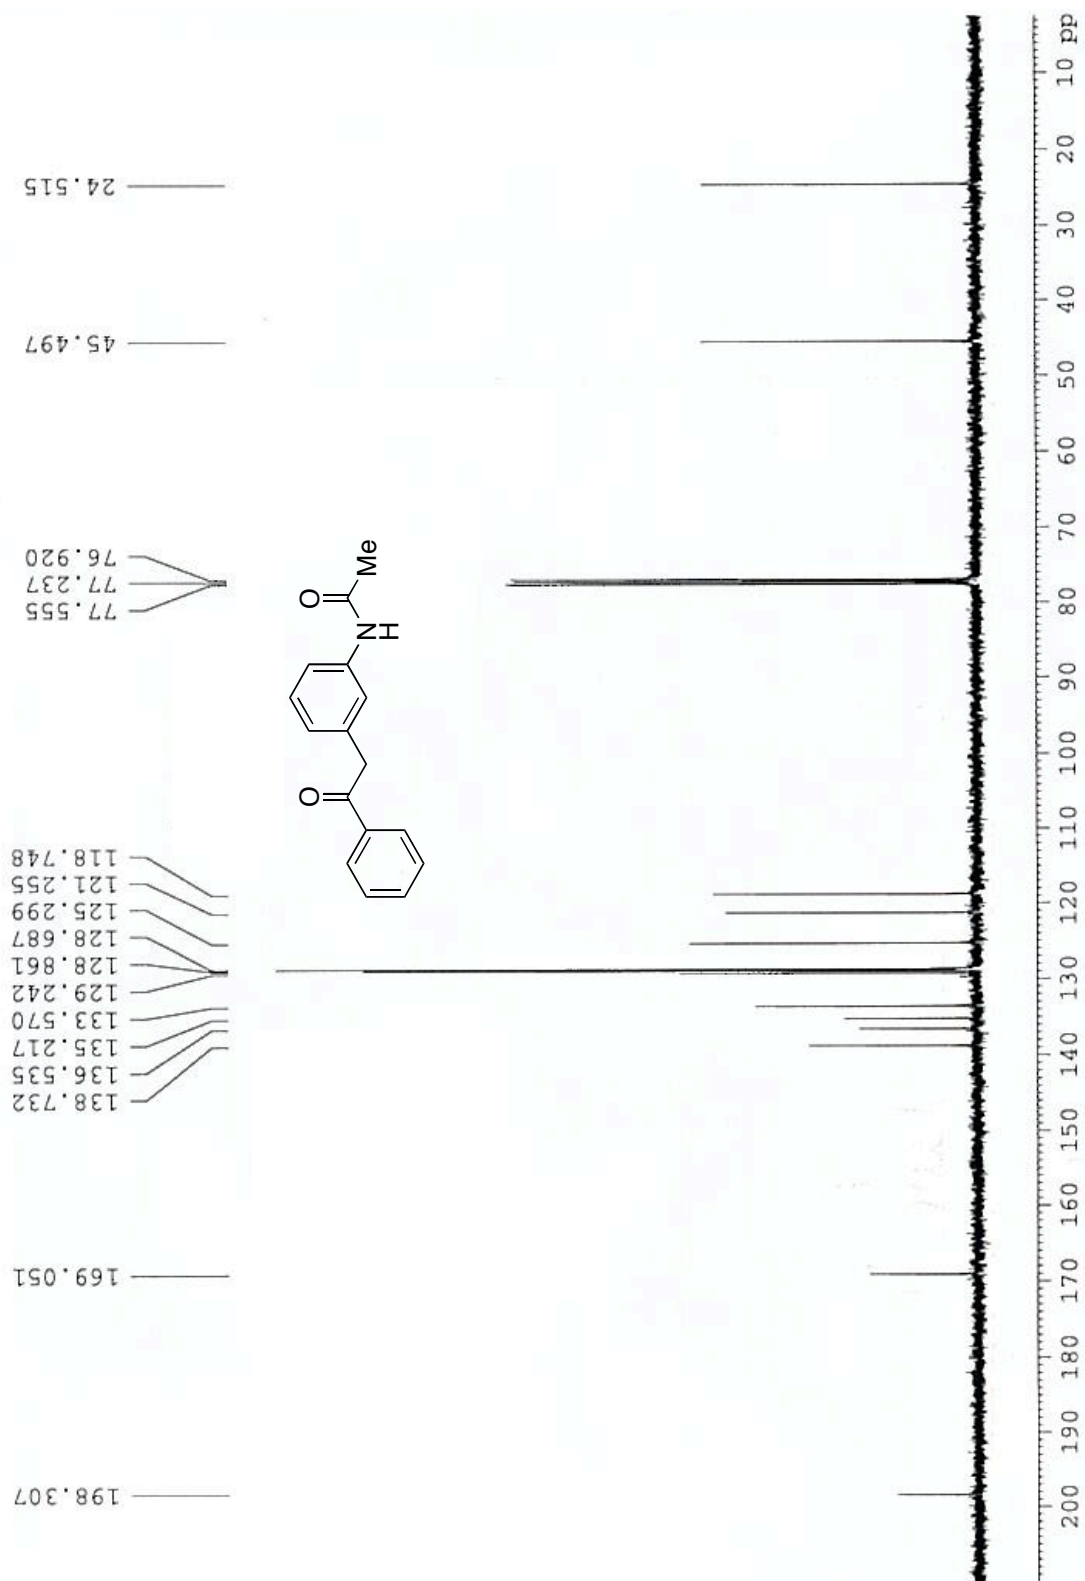

Supplement: NIHMS110655-supplement-SI.pdf [file NIHMS110655-supplement-SI.pdf]
